15 **Abstract**

16 The daily organisation of most mammalian cellular functions is attributed to circadian regulation of  
17 clock-controlled protein expression, driven by daily cycles of CRYPTOCHROME-dependent  
18 transcriptional feedback repression. To test this, we compared the circadian proteome and  
19 phosphoproteome of wild type and CRY-deficient fibroblast cells. Strikingly, CRY-deficient cells  
20 showed a two-fold increase in circadian-regulated proteins, phosphopeptides, and K<sup>+</sup> transport. This  
21 was accompanied by extensive remodelling of the cellular proteome overall, including reduced  
22 phosphatase and proteasome subunit expression. These adaptations rendered CRY-deficient cells  
23 more sensitive to stress, which may account for their reduced circadian robustness and contribute to  
24 the wide-ranging phenotypes of CRY-deficient mice. We suggest that CRY ultimately functions to  
25 suppress, rather than generate, daily rhythms in cellular protein abundance, thereby maintaining  
26 protein and osmotic homeostasis.

27

## 28 **Introduction**

29 From transcriptional activation and RNA processing, to protein synthesis, folding and degradation,  
30 multiple mechanisms operate at every stage of gene expression to ensure that each cellular protein is  
31 maintained in a concentration range appropriate to its biological function<sup>1–3</sup>. Proteome homeostasis  
32 is essential for cell viability and osmotic homeostasis, with the correct temporal regulation of protein  
33 activity being critical to every biological process—too much or too little at the wrong time underlies  
34 most pathological states<sup>4,5</sup>.

35  
36 In mammals, cellular physiology is temporally orchestrated around daily cycles that regulate most  
37 biological functions and much of the proteome to a circadian rhythm, whereas circadian dysregulation  
38 is strongly associated with pathological states<sup>6</sup>. On any given day, the circadian cycle is expressed  
39 by more cells of the human body than the cell division cycle, with daily rhythms in clock-controlled  
40 protein abundance thought to be the fundamental basis by which cell biology anticipates and  
41 accommodates the predictable demands of day and night<sup>6,7</sup>. Individual cellular rhythms are  
42 synchronised by endocrine cues such as insulin and glucocorticoid signalling, which function *in vivo*  
43 to align internal cellular timing with environmental cycles<sup>8</sup>. Daily rhythms in proteome composition  
44 are readily observed *in vivo* and persist in cultured cells under constant conditions *ex vivo*<sup>9,10</sup>. The  
45 average daily variation of rhythmically abundant proteins across a range of cellular contexts is ~10-  
46 20%<sup>9–12</sup>. There is little direct evidence that such modest variation would necessarily elicit rhythms  
47 in protein function, however, given that protein abundance is rarely rate-limiting for protein activity  
48 under physiological conditions<sup>13–16</sup>.

49  
50 Circadian regulation of a protein's abundance is most frequently attributed to cycling transcription of  
51 the encoding gene, despite recent investigations having revealed that mRNA and protein abundances  
52 correlate quite poorly, and that post-transcriptional and post-translational regulatory processes are at  
53 least as important<sup>17–21</sup>. Global transcriptional oscillations are facilitated by daily cycles of

54 transcriptional repression and derepression effected by products of the *Period1/2* and  
55 *Cryptochrome1/2* genes, and fine-tuned by various auxiliary but non-essential transcriptional  
56 feedback mechanisms<sup>17,18</sup>. The transcription of *Period*, *Cryptochrome* and other genes is stimulated  
57 by complexes containing the activating transcription factor BMAL1. The stability, interactions, and  
58 nucleocytoplasmic shuttling of the encoded PER and CRY proteins is regulated post-translationally  
59 until, many hours later, they repress the activity of BMAL1-containing complexes in a  
60 transcriptional-translation feedback loop (TTFL).

61

62 Within the TTFL circuit, CRY proteins are the essential repressors of BMAL1 complex activity<sup>22,23</sup>,  
63 whereas, PER proteins play critical signalling and scaffolding roles, required for the nuclear import  
64 and targeting of CRY to BMAL1-containing complexes<sup>23</sup>. CRY proteins also function as adaptors  
65 for the recruitment of E3 ubiquitin ligase complexes that target many proteins, including transcription  
66 factors, for ubiquitin-mediated proteolysis<sup>24</sup>. According to the current widely-accepted paradigm  
67 therefore, CRY-mediated transcriptional feedback repression is indispensable for the cell-  
68 autonomous circadian regulation of gene expression<sup>25-29</sup>, with resultant rhythms in clock-controlled  
69 protein abundance driving the daily co-ordination of cellular activity<sup>30</sup>.

70

71 Critically though, CRY-deficient cells and tissues remain competent to sustain circadian timing in  
72 the absence of TTFL function<sup>31-33</sup>, with a mechanism that is dependent on casein kinase 1 and protein  
73 degradation, as in wild type controls, as well as in naturally anucleate red blood cells<sup>34-36</sup>. Similarly,  
74 circadian oscillations persist in cells and tissue slices lacking BMAL1<sup>37,38</sup>. Since BMAL1 and CRY  
75 proteins are required for normal circadian regulation *in vivo*, and also required for TTFL function, it  
76 was thought that the complex phenotype of BMAL1- or CRY-deficient mice arises because circadian  
77 timekeeping is crucial for cellular and organismal physiology more generally<sup>39,40</sup>. The emerging  
78 observation that BMAL1 and CRY-deficient cells and tissues are competent to sustain certain  
79 elements of circadian regulation challenges this interpretation and suggests an alternative hypothesis:



80 that some or all phenotypic complexity associated with deletion of a ‘clock gene’ arises from  
81 additional functions of the encoded protein beyond the canonical TTFL model. Supporting this,  
82 several recent reports imply that various pathophysiological consequences of CRY-deficiency might  
83 be directly attributable to the absence of CRY function rather than impairment of circadian  
84 transcriptional regulation <sup>12,41–44</sup>. Overall then, current evidence suggests that whilst CRY-mediated  
85 circadian transcriptional feedback repression is crucial for cycling TTFL activity, rhythmic  
86 robustness and co-ordinating outputs <sup>7,23,26,28,29,36</sup>, it is not essential for the cell-intrinsic capacity to  
87 maintain daily timekeeping <sup>33</sup>.

88

89 To test this alternative hypothesis, and thereby gain insight into how CRY confers rhythmic  
90 robustness, we investigated the molecular consequences of CRY deficiency on cellular protein  
91 expression over several days using an unbiased whole cell (phospho)proteomic strategy. Our findings  
92 reveal a crucial role for CRY in the maintenance of protein and osmotic homeostasis, with CRY-  
93 deficient cells exhibiting a chronic stress-like state that may underlie their reduced robustness as well  
94 as the complex and numerous consequences of CRY deletion in mice and their tissues.

95

## 96 **Results**

### 97 **Cell-autonomous rhythms in the proteome and phosphoproteome persist in the absence of CRY**

98 To understand the proteomic and phosphoproteomic consequences of CRY deletion, we used  
99 confluent primary mouse fibroblasts, a classic model of cellular circadian timekeeping where contact  
100 inhibition prevents any interference from the cell division cycle <sup>9</sup>. Wild-type (WT) and CRY1<sup>-/-</sup>;  
101 CRY2<sup>-/-</sup> (CKO) mouse fibroblasts in cell culture were isolated from otherwise isogenic mice and  
102 synchronised using daily temperature cycles then sampled under constant conditions (Figure 1A).  
103 Quantitative proteomics detected over 6000 proteins and around 4000 phosphopeptides in both cell  
104 types. We were surprised to find that, averaging across the time course, the overall abundance and  
105 relative phosphorylation of most detected proteins was significantly altered in CKO cells compared  
106 with WT controls (Figure 1B, C), by an average of 21%. This striking CRY-dependent change in  
107 overall proteome composition was similar to previous findings in CKO mouse liver <sup>12</sup> (Figure S1A).

108  
109 In our cellular time course, as expected <sup>26,28,45</sup>, CRY1 was selectively detected in WT, but not CKO  
110 cells, and displayed a ~24h rhythmic abundance profile across the time course with delayed phase  
111 relative to a PER2 luciferase reporter (PER2::LUC) recorded from parallel replicate cultures (Figure  
112 S1B). Heatmaps visualising the rhythmic proteins are shown in Figure S1D/E; with examples of  
113 rhythmic and arrhythmic (phospho)proteins shown in Figure S1F/G. Based on estimates of intrinsic  
114 noise of gene expression <sup>46-50</sup>, we chose a threshold of 10% relative amplitude to define biological  
115 significance for protein abundance oscillations; no such studies were available for protein  
116 phosphorylation.

117  
118 In WT cells, 7% of detected proteins and 8% of detected phosphopeptides showed significant  
119 circadian abundance rhythms. Unexpectedly, 17% of detected proteins and 14% of phosphopeptides  
120 in CKO cells were rhythmically abundant (Figure 1D, E). Using an independent statistical tool to test

121 for rhythmicity (eJTK cycle), we found that similarly, more rhythmic species were present in CKO  
122 cells compared with WT, and with small overlap (Figure S1C).

123

### 124 **CRY suppresses the cell-autonomous rhythmic proteome and phosphoproteome**

125 Amongst the minority of proteins that were rhythmically abundant in both genotypes (Figure 1D),  
126 there was a modest but significant increase of median relative amplitude in CKO cells compared with  
127 WT (Figure 2A). We calculated the mean abundance of each detected protein over time and divided  
128 them into deciles of abundance. We then plotted the proportion of proteins within each decile that  
129 were rhythmic against the abundance mid-point of each decile. In this way we found that more  
130 abundant proteins were more likely to be rhythmic than less abundant proteins, but crucially, this  
131 relationship was stronger for CKO cells compared to WT cells (Figure 2B). Although part of this  
132 correlation may be due to preferential and more accurate detection of oscillating high abundance  
133 proteins, this explanation cannot account for the different relationships in WT and CKO cells. As  
134 with proteins, we found that CKO rhythmic phosphopeptides were significantly increased in relative  
135 amplitude and abundance compared with WT (Figure 2C, D). Therefore, the TTFL-independent  
136 circadian rhythm seen in CKO cells drives oscillations of higher relative amplitude and acts  
137 preferentially towards more abundant proteins and phosphopeptides.

138

139 The phase distribution of rhythmic proteins in both genotypes was clustered at experimental time 0 h  
140 (Figure 2E, F), when PER2::LUC activity in wild type cells was maximal (Figure S1A). This phase  
141 clustering was also true for proteins that were only rhythmic in CKO cells (Figure 2H), and for most  
142 proteins that were only rhythmic in WT cells (Figure 2G). A subset of proteins and phosphopeptides  
143 that were rhythmic in WT only, including CRY1, were clustered at a later circadian phase (Figure  
144 2G). This cluster was not present in proteins and phosphopeptides that were rhythmic in CKO only  
145 (Figure 2H). In WT cells we observed clustering of protein phosphorylation to an earlier phase (by 3  
146 h) compared to rhythmically abundant proteins and PER2::LUC (Figure 2I) with higher relative

147 amplitude (Figure 1E); this phase relationship has strong similarities with observations in mouse liver  
148 *in vivo*<sup>51</sup>. Whilst the same was true for CKO cells, there was a much broader distribution of phase  
149 among rhythmic phosphopeptides across 9 h that preceded peak rhythmic protein abundance (Figure  
150 2J).

151

152 These observations demonstrate that cell-autonomous rhythmic regulation of protein abundance and  
153 phosphorylation occurs independently of CRY. Instead, the primary role of CRY appears to be two-  
154 fold. First, consistent with its function as a rhythmic repressor of gene expression, CRY suppresses  
155 the amplitude of cellular protein and phosphopeptide abundance rhythms. Greater amplitudes were  
156 observed in the absence of CRY, coupled with more than twice the number of rhythmic proteins  
157 detected in WT cells, and with most rhythmic CKO (phospho)proteins not being detectably rhythmic  
158 in WT cells (Figure 1D, E). Secondly, in WT cells, CRY regulates the phase of rhythmicity for a sub-  
159 population of proteins and phosphopeptides whose abundance peaks around the same phase as CRY 1  
160 and in antiphase with the majority of the rhythmic (phospho)proteome.

161

162 Overall, we observed that a remarkable 82% of detected proteins in CKO cells were altered in  
163 abundance compared with WT (Figure S2A, Abundance up + down), suggesting that the respective  
164 synthesis and degradation rates of many proteins are altered by CRY deficiency. We postulated that  
165 CRY deletion might unmask rhythmicity in proteins that normally exhibit matched rhythms of  
166 synthesis and degradation in WT cells, i.e. constitutively present with rhythmic turnover. Supporting  
167 this, there was a significant association between changes in average protein abundance and changes  
168 in rhythmicity: we found that proteins that changed in overall abundance were more likely to change  
169 in rhythmicity: from arrhythmic to become rhythmic, or *vice versa* (Figure S2A). In this case, our  
170 observations would indicate that the cell-autonomous circadian clock regulates ~ 30% of the  
171 fibroblast proteome (Figure S2A, green + blue + brown), with CRY primarily acting to suppress  
172 rhythms in the abundance of most of these proteins (Figure S2A, green).

173

174 In fact, we found that there was greater overall variation in abundance of proteins detected in CKO  
175 cells (Figure S2B), suggesting that CRY may suppress changes in protein levels more generally. To  
176 verify this finding using an independent dataset, we calculated the fold-change in abundance for  
177 proteins detected by Mauvoisin *et al.* from WT and CKO mouse liver samples<sup>12</sup>. There was greater  
178 variation in protein abundance in CKO compared with WT (Figure S2C). Therefore, CRY also  
179 functions to suppress variation in protein abundance in mouse liver *in vivo* under diurnal conditions.

180

181 To test the effects of CRY deletion on the phosphoproteome, we performed the same analysis with  
182 detected phosphopeptides. As with the proteome, we found a strong link between changes in  
183 abundance and rhythmicity of phosphopeptides between the two genotypes (Figure S2D), as well as  
184 greater variation in phosphopeptide abundance in CKO compared with WT cells (Figure S2E).

185

186 We also observed an increase in overall protein phosphorylation in CKO cells (Figure 1C, S3A). We  
187 therefore considered whether CRY deletion might impact upon the abundance or activity of protein  
188 kinases and phosphatases, which act in dynamic equilibrium to determine the phosphorylation level  
189 of each peptide we detected. In our proteomics dataset there was no significant overall change in  
190 abundance of protein kinases (Figure S3B). To validate this, we employed the PHOSIDA database  
191<sup>52,53</sup> to infer rhythmic kinase activity; and found that targets of kinases typically associated with  
192 circadian regulation were not over-represented in WT or CKO rhythmic datasets compared to  
193 background, nor in the set of phosphopeptides that were rhythmic in both genotypes (Figure S3C-E).  
194 CKO cells did show an overall decrease in abundance of protein phosphatases however (Figure S3B),  
195 which may plausibly account for both increased overall phosphorylation and increased rhythmic  
196 phosphorylation in CKO compared with WT cells. This would suggest that CRY normally functions  
197 to globally suppress steady-state protein phosphorylation, as well as rhythms in protein  
198 phosphorylation, in part through regulation of phosphatase abundance.

199

200 Bringing these observations together we suggest that the synthesis and degradation of many proteins,  
201 as well as the phosphorylation and dephosphorylation of many phosphosites, may be coupled through  
202 a mechanism that requires CRY to be present. CRY deletion therefore elicits a significant change in  
203 dynamic steady-state abundance for most of the (phospho)proteome, including a sub-set of proteins  
204 that are normally circadian-regulated, thereby revealing more than twice the number of rhythmic  
205 proteins and phosphopeptides detected in WT cells. The altered protein stoichiometries of CKO  
206 compared with WT cells and tissues would be described as a state of proteome imbalance if it  
207 occurred in the context of cancer cells<sup>54</sup> and is normally associated with altered protein homeostasis.  
208 That such proteome imbalance is observed in primary cells and tissues suggests the presence of  
209 widespread changes in the cellular determinants of proteome composition<sup>4,5</sup>.

210

### 211 **CRYPTOCHROME regulates proteasome activity and translation rate**

212 We explored potential mechanisms for the widespread proteome changes in CKO cells by searching  
213 our dataset for key factors regulating protein synthesis and degradation. We did not interrogate the  
214 transcriptome of CKO cells, which has been adequately addressed elsewhere, and since there is now  
215 overwhelming consensus that mRNA abundance is poorly predictive of protein abundance<sup>10–12,55–64</sup>.  
216 We found a striking reduction in the abundance of catalytic proteasomal subunits (Figure 3A) which  
217 we validated by western blot and enzymatic assays of proteasome activity (Figure 3B-D, S4A).

218

219 Whilst there was no consistent change in ribosomal subunit abundance, we also observed a significant  
220 increase in cytosolic protein synthesis rate by <sup>35</sup>S-methionine incorporation (Figure 3E, S4B, C), as  
221 observed previously by puromycin incorporation<sup>33</sup>. We considered that the combined effect of  
222 reduced proteasomal activity and increased translation rate would affect the overall steady state levels  
223 of cellular protein. We found this to be the case, with a modest but significant increase in overall  
224 protein per CKO cell compared with WT (Figure 3F).

225

226 These cultured CKO cells express more protein than WT cells, with increased translation and  
227 decreased proteasomal degradation. Altogether, and in light of previous observations<sup>65-67</sup>, our data  
228 suggest that CKO cells likely maintain a different set point for protein homeostasis, as also occurs in  
229 many pathological states<sup>4,5</sup>.

230

### 231 **Rhythmic regulation of ion transport and protein content is CRY-independent**

232 Mammalian and other eukaryotic cells devote significant resources to ensuring osmotic equilibrium  
233 over the plasma membrane, in order to maintain cell volume and prevent protein aggregation<sup>67-70</sup>.  
234 Changes in cytosolic macromolecule content are balanced by compensatory ion transport, primarily  
235 mediated by K<sup>+</sup>, the major cellular osmolyte<sup>67,68</sup>. Two independent lines of evidence suggested that  
236 CKO cells would exhibit altered osmotic homeostasis.

237

238 First, we searched for rhythmically regulated cellular processes in CKO and WT cells using gene  
239 ontology (GO) analysis. Of the rhythmically abundant proteins, ranked GO analysis revealed  
240 consistent enrichment for processes associated with ion transport, both in wild type and CKO cells  
241 when analysed separately or combined (Figure 4A-C). Interrogation of the proteomics dataset then  
242 revealed altered expression levels and increased rhythmic amplitudes of many ion transporters in  
243 CKO compared with WT cells (Figure S5A, B). This included several members of the SLC12A  
244 family of electroneutral transporters (Figure 4F), that contribute to the maintenance of osmotic  
245 homeostasis against variations in cytosolic protein concentration in wild type cells over the circadian  
246 cycle<sup>71</sup>. Second, since many proteins are cytoplasmic, we considered that if CRY normally  
247 suppresses rhythms in the abundance of many individual proteins that normally peak around the same  
248 circadian phase (Figure 2E-H) then the consequence of CRY deletion would be to increase the overall  
249 amplitude of daily rhythms in soluble cytosolic protein content.

250

251 To validate this, we measured the  $K^+$  content of cells across the circadian cycle. Consistent with  
252 previous investigations <sup>71</sup>, in WT cells,  $K^+$  and digitonin-extracted cytosolic protein concentrations  
253 exhibited antiphasic circadian rhythms (Figure 4D, Figure S5C), with no significant daily variation  
254 in total cellular protein. The same was observed in CKO cells (Figure 4E), but with higher relative  
255 amplitudes for soluble protein and  $K^+$  (Figure 4G, H). Considering previous observations <sup>71</sup>, the  
256 higher amplitude cytosolic protein rhythm in CKO cells likely drives the higher amplitude  $K^+$  rhythms.  
257 This is facilitated by increased expression and amplitude of SLC12A transporter activity (Figure 4F),  
258 which buffers cellular osmotic potential in response to greater changes in cytosolic macromolecular  
259 content over the circadian cycle <sup>71</sup>.

260

261 Previous work has suggested that compensatory  $K^+$  transport is a fundamental feature of eukaryotic  
262 cell biology allowing cells to accommodate changes in cytosolic macromolecular content whilst  
263 maintaining osmotic homeostasis <sup>67,71</sup>. Our present observations suggest that this occurs  
264 independently of CRY-mediated transcriptional feedback repression. Indeed, it is plausible that an  
265 important role of CRY may be to suppress daily changes in cytosolic macromolecular content and  
266 thus maintain osmotic balance more efficiently over the circadian cycle. This would effectively  
267 increase the capacity of WT cells to respond appropriately to any acute stimulus that requires change  
268 in proteome composition e.g. insulin/IGF-1 signalling <sup>8</sup>.

269

### 270 **CRY-deficient cells are more sensitive to proteotoxic stress**

271 The viability of CKO cells and mice clearly suggests that they do maintain protein homeostasis  
272 overall, despite proteome imbalance and an altered set point for protein homeostasis compared with  
273 WT controls. Proteome imbalance typically renders cells more sensitive to stress <sup>3</sup>. Using ranked GO  
274 analysis of overall protein fold-changes compared with WT, we found that the expression of proteins  
275 involved in “response to stress” was increased in CKO cells (Figure S6A), suggesting that the  
276 proteostasis network in CKO cells is in an activated state <sup>66,72,73</sup>.



277

278 We therefore hypothesised that CKO cells may be more susceptible to proteotoxic stress. To test this,  
279 we probed WT and CKO cells for phosphorylation of eIF2 $\alpha$ , a well-characterised marker of the  
280 integrated stress response (ISR). As a control we treated cells with tunicamycin, which gradually  
281 induces the integrated stress response *via* inhibition of secretory pathway protein glycosylation<sup>74,75</sup>.  
282 We observed increased eIF2 $\alpha$  phosphorylation in CKO compared with WT cells, at all timepoints  
283 (Figure 5A-B). This is strongly indicative of increased proteotoxic stress in these CKO cells.

284

285 We note that in most cases eIF2 $\alpha$  phosphorylation is known to acutely suppress translation<sup>72</sup>, yet we  
286 observed a net increase of protein synthesis in CKO cells (Figure 3C, S4D-E). This may be reconciled  
287 by our observation that density regulated protein (DENR) and eIF2A, additional alternative subunits  
288 of the translation initiation complex, were significantly upregulated in CKO cells compared with WT  
289 (Figure S6B-C); and suggests a mechanism whereby chronically stressed CKO cells may overcome  
290 increased basal eIF2 $\alpha$  phosphorylation, that normally only occurs under acute stress<sup>76-79</sup>.

291

292 We next sought to test whether increased stress was associated with CRY-deficiency in mouse tissues.  
293 STAT3 is a transcription factor that whose phosphorylation on Tyr705 is a well-established  
294 inflammatory marker for both chronic and acute cellular stress *in vivo*, across a range of cell types<sup>80-</sup>  
295<sup>82</sup>. We therefore probed for phosphorylated STAT3 in mouse lungs 5 hours after intraperitoneal  
296 injection of bortezomib (BTZ, proteasome inhibitor) or vehicle (control). Compared with WT tissue,  
297 we observed increased STAT3 phosphorylation in control CKO mouse lungs, which was further  
298 elevated above WT upon BTZ treatment (Figure 5C-D). This shows CRY-deficiency is associated  
299 with increased stress and increased sensitivity to stress in mouse tissue, as well as cultured primary  
300 cells.

301

302 **Proteotoxic stress impairs rhythmic robustness**

303 Daily rhythms of PER2 activity in CKO cells (as measured by PER2::LUC bioluminescence) are less  
304 robust than in WT cells, being more variable in their expression and damping more rapidly<sup>33</sup>. At the  
305 outset of this investigation, we asked how CRY confers increased robustness upon cellular circadian  
306 rhythms observed in WT cells, and found evidence suggesting that proteome imbalance in CRY-  
307 deficient cells renders them more sensitive to stress. Noting that several different cellular stressors  
308 (reductive, oxidative, metabolic, transcriptional inhibition) have previously been reported to  
309 reversibly attenuate the expression of cellular circadian rhythms<sup>83,84</sup>, our observations suggested the  
310 hypothesis that the altered set point of protein homeostasis in CKO renders them more susceptible to  
311 stress, which in turn leads to their reduced rhythmic robustness. This informed the prediction that  
312 circadian rhythms in WT cells would be less robust, and therefore damp more rapidly, when subject  
313 to chronic proteotoxic stress. To test this we monitored PER2::LUC rhythms in WT cells where  
314 proteotoxic stress was elicited by sustained inhibition of three different pathways: with epoxomicin  
315 (proteasome inhibitor), tunicamycin (unfolded protein ER stress response) or radicicol (HSP90  
316 inhibitor). Consistent with our hypothesis, we observed significantly increased damping rate in  
317 treated cells compared with controls, which was reversible upon drug removal by a media change  
318 (Figure 6A-F). Thus, chronic proteotoxic stress is sufficient to impair robustness of circadian rhythms,  
319 and in principle this may contribute to the reduced robustness and timekeeping fidelity of CKO cells  
320 and tissues, as well as diverse CKO mouse phenotypes (Figure 6G, S6D-G, S7).

321

322

323 **Discussion**

324 **CRY defends cellular homeostasis, which is permissive for robust circadian rhythms**

325 In order to understand the reduced robustness of circadian rhythms in CRY-deficient cells we used  
326 several complementary mass spectrometry techniques. We found the abundance of most cellular  
327 proteins and protein phosphorylation, as well as the major cellular osmolyte ( $K^+$ ), to be profoundly  
328 perturbed by CRY-deficiency. This was associated with adaptations such as reduced proteasome  
329 activity and phosphatase abundance that alter the relative rates of protein synthesis/degradation, and  
330 phosphorylation/dephosphorylation, respectively. This results in altered osmotic homeostasis and a  
331 state of proteome imbalance compared with WT cells. Proteome imbalance is established as  
332 predisposing cells to stress<sup>54,85,86</sup> and is therefore very likely responsible for the increased proteotoxic  
333 stress and sensitivity to stress observed in CKO cells. Increased proteotoxic stress by three different  
334 mechanisms was sufficient to impair robustness of WT cellular circadian rhythms. Our data therefore  
335 suggest that proteome imbalance and associated stress are most likely responsible for the impaired  
336 timekeeping fidelity and reduced robustness of CKO cells and tissues *ex vivo*.

337

338 CRY proteins are well-characterised as rather promiscuous transcriptional repressors<sup>42,45,87</sup> as well  
339 as being selective E3 ubiquitin ligase adaptors<sup>24,88</sup>. Considering the diverse phenotypes, pathologies  
340 and proteome changes reported for other E3 ligase adaptor and transcriptional repressor knockout  
341 mice<sup>89-93</sup>, it is not surprising that the deletion of both *Cryptochrome* genes results in a similarly  
342 diverse range of phenotypes; especially when considering the very many identified targets and  
343 interacting proteins of CRY1 and CRY2<sup>24,42,45,87,88</sup>.

344

345 Proteome imbalance is already very strongly, and in some cases causally, linked to a range of  
346 pathological conditions including chronic inflammation, various cancers, metabolic disorders and  
347 neurodegeneration<sup>4,54,94-99</sup>. It is therefore quite plausible that proteome imbalance underlies the  
348 diverse range of phenotypes exhibited by CKO mice, including impaired body growth<sup>100,101</sup>,

349 increased susceptibility to multiple cancers<sup>102–105</sup>, chronic inflammation<sup>106–108</sup> and dysregulated  
350 insulin secretion/fat deposition on high fat diets<sup>109</sup>. Indeed, during the course of this research we  
351 observed that not only do CKO mice eat more and gain less weight than their isogenic WT  
352 counterparts, but they also succumbed to spontaneous mortality/morbidity with a much higher  
353 frequency (Figure S6D-G).

354

### 355 **CRY suppresses circadian rhythms in protein abundance and osmotic balance**

356 We also noticed that the profound alteration of cellular (phospho)proteome and ionic composition of  
357 CKO cells included a complete reorganisation of the subset of proteins and phosphoproteins that are  
358 subject to circadian regulation. To our surprise, roughly twice as many proteins and phosphopeptides  
359 were rhythmic in CKO cells compared with WT, but only a small minority of rhythmic species were  
360 common to both genotypes. We also found that significant changes in the overall abundance of a  
361 given protein or phosphopeptide were associated with a change in rhythmicity. The parsimonious  
362 interpretation of our findings is that, directly or indirectly, CRY normally functions to suppress  
363 rhythms in the abundance of a substantial proportion (19%) of detected cellular proteins, possibly by  
364 coupling rhythms of their synthesis and degradation to maintain a dynamic steady state with rhythmic  
365 flux (Figure S2A). Removing CRY unmasks the circadian rhythm for these proteins, with most  
366 (>80%) changing in overall abundance, due to the new steady state equilibrium that results from a  
367 change in the average rate of protein synthesis relative to degradation.

368

369 Importantly, we did observe a smaller proportion of cellular proteins (6% total), upon which CRY  
370 normally confers rhythmic abundance and which lose that rhythm when CRY is absent; consistent  
371 with the more canonical view of CRY function within the TTFL model for circadian rhythms. The  
372 majority of these proteins detected (>80% of 6%) also changed in overall abundance when CRY is  
373 absent, achieving a new equilibrium concentration for the same reason as those proteins where  
374 rhythmic abundance is suppressed by CRY (Figure S2A).

375

376 The hypothesis that CRY proteins primarily function to suppress, not generate, variation in protein  
377 abundance is further supported by *post-hoc* analysis of published data from mouse liver collected  
378 under diurnal cycles and quantified by an independent method <sup>12</sup>. If this hypothesis is correct, it  
379 informs the explicit prediction that, in wild type cells, a much greater proportion of proteins are  
380 subject to phase-coherent circadian regulation of synthesis/degradation than is apparent from their  
381 steady state abundance (Figure S7B). The same logic applies for protein (de)phosphorylation, and  
382 these predictions will be a major focus of our future investigations.

383

384 We also found that, compared to WT, CKO cells have increased protein abundance and reduced K<sup>+</sup>  
385 levels overall, as well as higher amplitude rhythms of cytosolic protein and K<sup>+</sup>. Changes in soluble  
386 protein concentration require stoichiometrically larger changes in ion concentration to maintain  
387 osmotic homeostasis <sup>69</sup>. We therefore suggest that CKO cells may have an impaired ability to buffer  
388 changes in intracellular osmolarity, particularly in response to external stimuli, which may contribute  
389 to their increased sensitivity to stress <sup>110,111</sup> and attenuated but prolonged response to growth factor  
390 stimulation <sup>8</sup>. Overall, our findings have significant implications for the role of CRY proteins  
391 specifically, and the canonical TTFL more generally, as well as opening several important avenues  
392 for future investigation.

393

#### 394 **The utility of circadian rhythms for cellular proteostasis**

395 It is frequently suggested that the adaptive advantage of cellular circadian clocks is to anticipate the  
396 differential demands of day and night, by turning on genes to accommodate the anticipated increase  
397 in demand for the activity of the encoded protein <sup>112</sup>. Protein synthesis is the most energetically  
398 expensive process that most cells undertake however, and multiple mechanisms exist to inactivate  
399 and sequester proteins that are not required <sup>1,86</sup>. Moreover, recent reports favour the view that changes  
400 in cellular transcriptomes function to buffer cellular proteomes, not perturb them <sup>19,20,113</sup>. Rather than

401 synthesise proteins as and when needed, it makes evolutionary sense that cells would expend energy  
402 to ensure a constant abundance of most proteins, which could then be mobilised on demand.

403

404 However costly though, damaged/misfolded proteins and activated signal transducers do need to be  
405 degraded and replaced to avoid deleterious consequences, such as aggregation and sustained pathway  
406 activation. We therefore hypothesise that, rather than rhythm generation, a fundamental advantage  
407 conferred on mammalian cells by the daily regulation of CRY activity, within and beyond the  
408 canonical TTFL circuit, is the temporal consolidation of proteome renewal, matching synthesis and  
409 degradation rates to keep protein concentrations constant and maintain protein homeostasis overall.  
410 Indeed, synchronised daily increases in protein synthesis and degradation are likely to be a  
411 prerequisite for the efficient assembly of macromolecular protein complexes<sup>114</sup>. Supporting this  
412 hypothesis, temporal consolidation of proteome renewal has been observed in yeast cells during their  
413 metabolic cycle, a biological oscillation that shares many key features with circadian rhythms in  
414 mammalian and other eukaryotic cells<sup>67</sup>. This hypothesis leads to the direct prediction that  
415 macromolecular complex assembly will be less efficient and more energetically expensive in cells  
416 and tissues that lack the capacity for daily regulation of gene expression cycles, such as *Cry1/2*, *Per1/2*  
417 and *Bmal1*-knockouts.

418

#### 419 **Caveats to our findings**

420 In this investigation, we specifically addressed how the steady state circadian cellular  
421 (phospho)proteome adapts to CRY deficiency in order to understand the impairment to cellular  
422 timekeeping. For this reason, we did not investigate transcriptional regulation in CKO cells, which  
423 we believe has been adequately characterised in excellent previous work<sup>25,26,28,33,115–118</sup>. Moreover  
424 the generally poor correlation between changes in transcript abundance with protein activity<sup>19,119–122</sup>  
425 means that causal relationships cannot be reliably inferred in any case. Thus, we do not exclude that  
426 circadian regulation of transcription occurs in CRY-deficient cells, indeed we have observed rhythms

427 in the activity of the *Nr1d1* promoter in CKO cells, albeit under very specific culture conditions with  
428 <5% the amplitude of WT controls<sup>33</sup>. Rather, the increased number and amplitude of protein  
429 abundances and phosphorylation we observed in CRY-deficient cells simply cannot be attributed to  
430 canonical CRY/PER-mediated transcriptional feedback repression, since CRY is not present and PER  
431 does not repress BMAL1 complexes without CRY<sup>22,23</sup>. We also have not addressed the nature of the  
432 post-translational mechanism postulated to generate circadian rhythms in mammalian cells, which is  
433 discussed elsewhere<sup>7,33</sup>.

434

435 A further caveat to our study is that, for technical reasons, the primary fibroblasts used for  
436 (phospho)proteomics came from a single, but otherwise isogenic, WT and CKO mouse. In our  
437 previous work, we have demonstrated circadian rhythms in many independently generated CKO  
438 fibroblast lines and tissues, isolated from many different mice<sup>33</sup>. Furthermore, analysis of published  
439 mouse liver data provides an independent validation of our finding that CRY primarily functions to  
440 suppress, not generate, daily protein variation. Moreover, the null hypothesis for this aspect of our  
441 analysis was either no rhythms or severely attenuated rhythms in CKO cells, as opposed to higher  
442 amplitude rhythms in more proteins, which was subsequently validated by independent methods in  
443 separate experiments (cytosolic [protein], & [K<sup>+</sup>]). Therefore, the most parsimonious interpretation  
444 of our findings is that CRY functions primarily to oppose daily protein abundance rhythms, rather  
445 than generate them, and thereby buffer cellular protein homeostasis over each daily cycle. We are not  
446 aware of any evidence to contradict this interpretation and have no reason to believe that there was  
447 anything special about the particular primary CKO fibroblasts used in this study.

448

449 It is quite plausible, however, that the numbers and specific identity of many rhythmic  
450 (phospho)proteins would vary between independently isolated lines due to stochastic heterogeneity  
451 and clonal expansion effects, as also occurs with wild type cells<sup>123,124</sup>. It is also true that the numbers,  
452 identities and amplitudes of rhythmic proteins will inevitably vary somewhat, dependent on the

453 method of analysis used to determine rhythmicity (Figure S1B). It is not plausible, however, that a  
454 different method of rhythmicity analysis would yield a qualitatively different result. Moreover, our  
455 findings have a clear precedent in that oscillations of protein synthesis and degradation stimulate  
456 facilitatory metabolism and compensatory ion transport to maintain osmotic and protein homeostasis  
457 during the metabolic cycle of yeast cells <sup>67</sup>. Indeed, the many mechanistic features shared between  
458 mammalian circadian rhythms and yeast respiratory oscillations may indicate a common ancestral  
459 origin <sup>125</sup>.

460

461 In our kinase inference analysis, we were surprised not to find evidence supportive of circadian  
462 phosphorylation by casein kinase 1 or any of the other kinases implicated in the post-translational  
463 circadian regulation. Indeed, the very poor overlap in rhythmically phosphorylated proteins between  
464 the two genotypes, and between rhythmic phosphorylation and rhythmic protein in either genotype,  
465 suggests that the circadian functions of this post-translational modification are likely to be context-  
466 dependent. As with the proteome, however, we did notice a highly significant association between  
467 change in rhythmicity and change in phosphopeptide abundance. If a similar interpretation to that  
468 which we propose for the proteome were true, it would imply that as much as 20% of protein  
469 phosphorylation is subject to cell-autonomous circadian regulation (Figure S2D), and in most cases  
470 it is matched by a dephosphorylation rhythm of similar phase and amplitude. Given the consolidation  
471 of phosphorylation rhythms around a temporal window that anticipates the active phase (Figure 2G),  
472 we speculate that the co-ordinated phase-coherent circadian regulation of phosphorylation and  
473 dephosphorylation at many phosphosites, without change in their steady state phosphorylation level,  
474 might confer more sensitive and rapid transduction of a given extracellular stimulus when received  
475 around the rest-to-active transition compared with 12 hours later. Future work will be required to test  
476 this hypothesis experimentally.

477

478 **Conclusion**



479 In conclusion, we have shown that CRY-dependent feedback mechanisms are not required for cell-  
480 autonomous circadian rhythms of protein abundance or phosphorylation in mammalian cells.  
481 Moreover, when CRY is present, it functions to suppress more abundance rhythms than it facilitates  
482 both *ex vivo* and *in vivo*. CRY-deficiency was associated with an overall imbalance of the proteome,  
483 through changes in protein stoichiometries, reduced proteasome activity, increased protein synthesis  
484 and overall protein levels. Cells adapt to this genetic insult by altering osmotic balance and proteome  
485 composition to achieve a different set point for protein homeostasis, with increased basal stress and  
486 sensitivity to proteotoxic stress. This likely accounts for the impairment of circadian timekeeping in  
487 CKO cells, tissues and mice, and may also contribute to the (patho)physiological consequences of  
488 CRY-deficiency in mice. We speculate that the principal utility of CRY-mediated feedback  
489 repression is to couple global protein synthesis with degradation rates for most proteins, to minimise  
490 changes in protein abundance. This would ensure the energetically efficient temporal consolidation  
491 of proteome renewal during each day, whilst defending protein and osmotic homeostasis.  
492

493 **Methods**

494 **Mammalian cell culture**

495 All animal work was licensed by the Home Office under the Animals (Scientific Procedures) Act  
496 1986, with Local Ethical Review by the Medical Research Council and the University of Cambridge,  
497 UK. Fibroblasts homozygous for PER2::LUCIFERASE<sup>126</sup> were extracted from adult mouse lung  
498 tissue and then serial passage was used as described previously to induce spontaneous  
499 immortalisation<sup>125,127</sup>. Fibroblasts were cultured in Dulbecco's Modified Eagle Medium (DMEM),  
500 supplemented with 100 units/ml penicillin, 100 µg/ml streptomycin (Gibco) and 10% FetalClone III  
501 serum (HyClone, Thermo Fisher). All cells were confirmed to be free of Mycoplasma. Unless stated  
502 otherwise, confluent cell cultures up to a maximum of 30 passages were used during experiments to  
503 abolish any effects of cell division, since these cells display contact inhibition.

504

505 **General statistics**

506 P values are annotated in figures with asterisks, where the number of asterisks indicates the  
507 significance: Ns = not significant; \* = p≤0.05; \*\* = p≤0.01, \*\*\* = p≤0.001; \*\*\*\* = p≤0.0001.  
508 Technical replicates are denoted as “n” in the figures or figure legends (e.g. n=3), and biological  
509 replicates are denoted as “N”. Statistical tests were carried out using Prism Graphpad 8 (San Diego,  
510 Ca) or R v4.0.3.

511

512 **Longitudinal bioluminescent reporter experiments**

513 Data from longitudinal bioluminescence recordings were analysed using Prism Graphpad 8 (San  
514 Diego, Ca). A 24-hour moving average was used to detrend data, and a circadian damped cosine wave  
515 was fitted by least-squares regression to determine period, phase and amplitude:

516 
$$y = (mx + c) + a e^{-kx} \cos\left(\frac{2\pi x - r}{p}\right)$$

517

518 Where  $m$  is the baseline gradient,  $c$  is the displacement in the  $y$  axis,  $k$  is the damping rate,  $a$  is the  
519 amplitude,  $r$  is the phase and  $p$  is the period. The first 24 hours of each recording were omitted because  
520 this represents the transient effects of medium change on clock gene expression. Rhythmicity of  
521 bioluminescence recordings was assessed by comparing the fit of this equation to the null hypothesis  
522 of a straight line using the Extra sum-of-squares F test in Prism Graphpad 8 (San Diego, CA). If  
523 fitting to the damped cosine was preferred ( $p \leq 0.05$ ) then the recording was deemed “rhythmic”.

524

### 525 **Timecourse experiments: general structure**

526 Cells were plated at a near-confluent density (roughly 27,000 cells per  $\text{cm}^2$ ) and cultured in DMEM  
527 with 10% FetalClone III serum for one week in a temperature-controlled incubator that was  
528 programmed to oscillate between 32°C and 37°C, with transitions every 12 hours. The cells received  
529 a medium change at the transition between 37°C and 32°C after 4 days. After another 3 days the cells  
530 received another medium change at the same transition time into medium containing either 10% or  
531 1% serum, and the incubator was programmed to remain at 37°C constantly. At this time, a subset of  
532 cells received medium containing 1 mM luciferin, and these were placed into an ALLIGATOR for  
533 bioluminescent recording. After 24 hours, sampling began, with 3 hour intervals, and continuing for  
534 3 days. The time point of the first sample is known as “Experimental time 0”, and all time points are  
535 reported relative to this. The nature of the sampling varied according to the specific experiment, and  
536 details are presented in separate sections.

537

### 538 **Proteomics and phosphoproteomics**

#### 539 *Sample preparation*

540 A timecourse was carried out as described above. At each timepoint cells were washed twice in ice  
541 cold PBS and then lysed at room temperature in 100  $\mu\text{L}$  lysis buffer (8 M urea, 20 mM Tris, pH 8)  
542 for 20 minutes. The lysis buffer was prepared the day before sampling began, and frozen in 1 mL  
543 aliquots. At each timepoint, one aliquot was defrosted at room temperature (23°C) whilst shaking at

544 700 rpm for 5 minutes. After lysis the cells were scraped and technical replicates were combined  
545 before flash freezing in liquid nitrogen and storage at -80°C. After defrosting, the samples were  
546 sonicated for 2 minutes and the protein concentration was measured using a BCA assay (Pierce). 12  
547 pooled samples were created by combining a portion of each experimental sample such that each  
548 sample/pool contained an equal amount of protein. All samples were then flash frozen in liquid  
549 nitrogen and stored at -80°C.

550

### 551 *Enzymatic Digestion*

552 Each sample (256 µg) was reduced with 5 mM DTT at 56°C for 30 minutes and then alkylated with  
553 10 mM iodoacetamide in the dark at room temperature for 30 minutes. They were then digested with  
554 mass spectrometry grade Lys-C (Promega) at a protein:Lys-C ratio of 100:1 (w/w) for 4 hours at  
555 25°C. Next, the samples were diluted to 1.5 M urea using 20 mM HEPES (pH 8.5) and digested at  
556 30°C overnight with trypsin (Promega) at a ratio of 70:1 (w/w). Digestion was quenched by the  
557 addition of trifluoroacetic acid (TFA) to a final concentration of 1%. Any precipitates were removed  
558 by centrifugation at 13000g for 15 minutes. The supernatants were desalted using homemade C18  
559 stage tips containing 3M Empore extraction disks (Sigma) and 5 mg of Poros R3 resin (Applied  
560 Biosystems). Bound peptides were eluted with 30-80% acetonitrile (MeCN) in 0.1% TFA and  
561 lyophilized.

562

### 563 *TMT (Tandem mass tag) peptide labelling*

564 The lyophilized peptides from each sample were resuspended in 100 µl of 2.5% MeCN, 250 mM  
565 triethylammonium bicarbonate. According to manufacturer's instructions, 0.8 mg of each TMT  
566 10plex reagent (Thermo) was reconstituted in 41 µl of anhydrous MeCN. The peptides from each  
567 time point and pooled sample were labelled with a distinct TMT tag for 75 minutes at room  
568 temperature. The labelling reaction was quenched by incubation with 8 µl 5% hydroxylamine for 30  
569 min. For each set of 10-plex TMT reagent, the labelled peptides from 8 time point samples + 2 pools

570 were combined into a single sample and partially dried to remove MeCN in a SpeedVac (Thermo  
571 Scientific). After this, the sample was desalted as before and the eluted peptides were lyophilized.

572

### 573 ***Basic pH Reverse-Phase HPLC fractionation***

574 The TMT labelled peptides were subjected to off-line High Performance Liquid Chromatography  
575 (HPLC) fractionation, using an XBridge BEH130 C18, 3.5  $\mu$ m, 4.6 mm x 250 mm column with an  
576 XBridge BEH C18 3.5  $\mu$ m Van Guard cartridge (Waters), connected to an Ultimate 3000  
577 Nano/Capillary LC System (Dionex). Peptide mixtures were resolubilized in solvent A (5% MeCN,  
578 95% 10 mM ammonium bicarbonate, pH 8) and separated with a gradient of 1-90% solvent B (90%  
579 MeCN, 10% 10 mM ammonium bicarbonate, pH 8) over 60 minutes at a flow rate of 500  $\mu$ l/min. A  
580 total of 60 fractions were collected. They were combined into 20 fractions and lyophilized and  
581 desalted as before. 5% of the total eluate from each fraction was taken out for proteome LC-MS/MS  
582 analysis and the rest was used for phosphopeptide enrichment.

583

### 584 ***Enrichment of phosphopeptides***

585 All 20 fractions of peptide mixture were enriched first using PHOS-Select iron affinity gel, an Iron  
586 (III) Immobilised Metal Chelate Affinity Chromatography (IMAC) resin (Sigma). Desalted peptides  
587 were resuspended in 30% MeCN, 0.25 M acetic acid (loading solution) and 30  $\mu$ l of IMAC beads,  
588 previously equilibrated with the loading solution, was added. After 60 minutes incubation at room  
589 temperature, beads were transferred to a homemade C8 (3M Empore) stage tip and washed 3 times  
590 with loading solution. Phosphopeptides were eluted sequentially with 0.4 M  $\text{NH}_3$ , 30% MeCN, 0.4  
591 M  $\text{NH}_3$  and 20  $\mu$ l of 50% MeCN, 0.1% TFA.

592

593 The flow-through from the C8 stage tips was collected and combined into 10 fractions and used for  
594 titanium dioxide ( $\text{TiO}_2$ ) phosphopeptide enrichment. For this, the total volume of flow-through was  
595 made up to 50% MeCN, 2 M lactic acid (loading buffer) and incubated with 1-2 mg  $\text{TiO}_2$  beads

596 (Titansphere, GL Sciences, Japan) at room temperature for 1 hour. The beads were transferred into  
597 C8 stage tips, washed in the tip twice with the loading buffer and once with 50% MeCN, 0.1% TFA.  
598 Phosphopeptides were then eluted sequentially with 50 mM K<sub>2</sub>HPO<sub>4</sub> (pH 10) followed by 50%  
599 MeCN, 50 mM K<sub>2</sub>HPO<sub>4</sub> (pH 10) and 50% MeCN, 0.1% TFA.

600

601 The first 10 fractions of IMAC and the 10 fractions of TiO<sub>2</sub> enriched phosphopeptides were combined,  
602 and the other 10 fractions from IMAC enrichment were combined into 5 fractions, thus making a  
603 total of 15 fractions for phosphoproteomics analysis. Phosphopeptide solution from these fractions  
604 were acidified, partially dried, and desalted with a C18 Stage tip that contained 1.5 µl of Poros R3  
605 resin. These were then partially dried again and thus ready for mass spectrometry analysis.

606

#### 607 ***LC MS/MS***

608 The fractionated peptides were analysed by LC-MS/MS using a fully automated Ultimate 3000 RSLC  
609 nano System (Thermo) fitted with a 100 µm x 2 cm PepMap100 C18 nano trap column and a 75 µm  
610 × 25 cm reverse phase C18 nano column (Acclaim PepMap, Thermo). Samples were separated using  
611 a binary gradient consisting of buffer A (2% MeCN, 0.1% formic acid) and buffer B (80% MeCN,  
612 0.1% formic acid), and eluted at 300 nL/min with an acetonitrile gradient. The outlet of the nano  
613 column was directly interfaced via a nanospray ion source to a Q Exactive Plus mass spectrometer  
614 (Thermo). The mass spectrometer was operated in standard data-dependent mode, performing a MS  
615 full-scan in the m/z range of 350-1600, with a resolution of 70000. This was followed by MS2  
616 acquisitions of the 15 most intense ions with a resolution of 35000 and Normalised Collision Energy  
617 (NCE) of 33%. MS target values of 3e6 and MS2 target values of 1e5 were used. The isolation  
618 window of precursor ion was set at 0.7 Da and sequenced peptides were excluded for 40 seconds.

619

620

621

622 ***Spectral processing and peptide and protein identification***

623 The acquired raw files from LC-MS/MS were processed using MaxQuant (Cox and Mann) with the  
624 integrated Andromeda search engine (v1.6.3.3). MS/MS spectra were quantified with reporter ion  
625 MS2 from TMT 10plex experiments and searched against the *Mus musculus* UniProt Fasta database  
626 (Dec 2016). Carbamidomethylation of cysteines was set as fixed modification, while methionine  
627 oxidation, N-terminal acetylation and phosphorylation (STY) (for phosphoproteomics group only)  
628 were set as variable modifications. Protein quantification requirements were set at 1 unique and razor  
629 peptide. In the identification tab, second peptides and match between runs were not selected. Other  
630 parameters in MaxQuant were set to default values.

631

632 The MaxQuant output file was then processed with Perseus (v1.6.2.3). Reporter ion intensities were  
633 uploaded to Perseus. The data was filtered: identifications from the reverse database were removed,  
634 only identified by site, potential contaminants were removed, and we only considered proteins with  
635  $\geq 1$  unique and razor peptide. Then all columns with an intensity “less or equal to zero” were converted  
636 to “NAN” and exported. The MaxQuant output file with phosphor (STY) sites table was also  
637 processed with Perseus software (v1.6.2.3). The data was filtered: identifications from the reverse  
638 database were removed, only identified by site, potential contaminants were removed and we only  
639 considered phosphopeptides with localization probability  $\geq 0.75$ . Then all columns with intensity  
640 “less or equal to zero” were converted to “NAN” and exported.

641

642 ***Bioinformatics***

643 All data handling was done using R v3.6.3. Since the sample for timepoint 12 was missing for CRY1<sup>-</sup>  
644 <sup>-</sup>; CRY2<sup>-</sup>, abundance values were inferred for each protein by taking the mean of the two  
645 neighbouring timepoints. WT and CKO datasets were analysed either combined or independently.  
646 The combined analysis was used to directly compare protein and phosphopeptide abundances  
647 between genotypes, since the internal reference scaling normalisation accounts for batch effects. The

648 independent method was used for all other analysis that did not require comparison of abundance,  
649 thus allowing the detection of proteins that were present in one genotype but not the other.

650

651 Proteins and phosphopeptides were only accepted for further analysis if present in all timepoints and  
652 pooled samples. Hence in the combined analysis, proteins/phosphopeptides had to be present in all  
653 timepoints for both genotypes, as well as all pooled samples. In the independent analysis,  
654 proteins/phosphopeptides had to be present in all timepoints and pools for one genotype only. Sample  
655 loading normalisation was carried out by taking the sum of all intensities for each time point and  
656 normalising to the mean of these, since an equal amount of protein was used for each TMT labelling  
657 reaction. This was followed by internal reference scaling (IRS) to allow for comparisons between  
658 TMT experiments <sup>128</sup>: for each TMT 10plex set the mean abundance for each protein in both pools  
659 was calculated. Then the mean of these means was calculated and used to normalise the values for  
660 each protein for all the samples.

661

662 Rhythmicity was tested using the RAIN (Rhythmicity Analysis Incorporating Non-parametric  
663 methods) algorithm <sup>129</sup>, and multiple testing was corrected for using the adaptive Benjamini-  
664 Hochberg method. Proteins with a corrected  $p \leq 0.05$  were deemed significant. Relative amplitude of  
665 rhythmic proteins was calculated by detrending the data using a 24-hour moving average and dividing  
666 the resultant range by the average normalised protein abundance. To include only proteins with a  
667 biologically relevant level of oscillation, only those with relative amplitude  $\geq 10\%$  were taken for  
668 further analysis (see text for details). Phosphoproteomics data were handled in the same way, except  
669 that normalised phosphopeptide abundances were adjusted according to the changes in abundance of  
670 the corresponding protein from the normalised total proteome data, and no threshold for relative  
671 amplitude was used.

672



673 Gene ontology analysis was performed using the GOrilla online tool <sup>130,131</sup>. Analysis was performed  
674 either as a single ranked list of gene names, or as a target dataset compared to background (all proteins  
675 detected in the experiment). Kinase recognition motifs were screened using a custom script written  
676 in Python v2.7, which used the PHOSIDA database <sup>52,53</sup>. Scripts and processed data are available on  
677 GitHub (<https://github.com/davwong47/Circadian-proteomics>). Mass spectrometry data have been  
678 deposited to the ProteomeXchange Consortium <sup>132</sup> via the PRIDE <sup>133</sup> partner repository with the  
679 dataset identifier PXD019499.

680

### 681 **Western blotting**

682 For Western blots, proteins were run on NuPAGE<sup>TM</sup> Novex<sup>TM</sup> 4-12% Bis-Tris Protein Gels (Thermo  
683 Fisher) before transferring to nitrocellulose membranes. For transfer, the iBlot system (Thermo Fisher)  
684 was used. Membranes were blocked using 5% milk powder (Marvel) or 0.125% BSA (Sigma) and  
685 0.125% milk powder (Marvel) in TBS containing 0.1% Tween-20 (TBST) for 30 minutes at room  
686 temperature then incubated with primary antibody at 4°C overnight. HRP-conjugated secondary  
687 antibodies (Thermo Fisher) diluted 1:10000 in blocking buffer were incubated with the blots for 1  
688 hour at room temperature. Chemiluminescence was detected in a Biorad chemidoc using Immobilon  
689 reagent (Millipore). Protein loading was checked by staining gels with Colloidal Coomassie Blue  
690 Stain (Severn Biotech). Densitometric analysis was carried out using Image Lab 4.1 (Biorad  
691 Laboratories 2012).

692

### 693 **Measurement of cellular protein content**

694 At specified time points, confluent monolayers of cells were washed twice with ice-cold PBS. Cells  
695 were then incubated with 200 µL digitonin lysis buffer (50 mM Tris pH 7.4, 0.01% digitonin, 5 mM  
696 EDTA, 150 mM NaCl, 1 U/mL Benzonase, protease and phosphatase inhibitors) on ice for 15 minutes  
697 before lysates were collected. For total protein extraction, cells were instead incubated with 200 µL  
698 RIPA buffer (50 mM Tris pH 7.4, 1% SDS, 5 mM EDTA, 150 mM NaCl, 1 U/mL Benzonase,

699 protease and phosphatase inhibitors), on ice for 15 minutes. Cells lysed with RIPA buffer were then  
700 scraped and collected and all samples were flash frozen in liquid nitrogen. After thawing, RIPA  
701 lysates were sonicated at high power for 10 seconds at 4°C to shear genomic DNA. RIPA lysates and  
702 digitonin lysates were clarified by centrifugation at 21,000 g for 15 minutes at 4°C.

703

704 Intrinsic tryptophan fluorescence was used to measure protein concentrations. 10 µL of each sample  
705 was transferred into a UV-transparent 384 well plate (Corning 4681) in quadruplicate. After brief  
706 centrifugation of the plate, quantification was carried out using a Tecan Spark 10M microplate reader,  
707 with excitation at 280 nm and emission at 350 nm. Standards were made using bovine serum albumin  
708 (Fisher Scientific), dissolved using the same lysis buffer as the lysates being measured. Standard  
709 curves were fitted to a quadratic curve using Prism Graphpad 8 (San Diego, Ca), and protein  
710 concentrations were interpolated.

711

### 712 **Measurement of intracellular ion content by Inductively Coupled Plasma - Mass Spectrometry** 713 **(ICP-MS)**

714 Confluent monolayers of cells were washed on ice with iso-osmotic buffer A (300 mM sucrose, 10  
715 mM Tris base, 1 mM EDTA, pH 7.4 adjusted with phosphoric acid, 330-340 mOsm adjusted with  
716 sucrose/HPLC water), followed by iso-osmotic buffer B (300 mM sucrose, 10 mM Tris base, 1 mM  
717 EDTA, pH 7.4 adjusted with acetic acid, 330-340 mOsm adjusted with sucrose/HPLC water). Iso-  
718 osmotic buffer A contains phosphoric acid which displaces lipid bound ions. Iso-osmotic buffer B  
719 contains acetic acid which removes traces of phosphates. Cells were then incubated for 30 minutes at  
720 room temperature in 200 µL ICP-MS cell lysis buffer (65% nitric acid, 0.1 mg/mL (100 ppb) cerium).  
721 Lysates were then collected and stored at -80°C. All samples were thawed simultaneously and diluted  
722 using HPLC water to a final concentration of 5% nitric acid. Diluted samples were analysed by  
723 Inductively Coupled Plasma - Mass Spectrometry (ICP-MS) using the NexION 350D ICP-MS  
724 (PerkinElmer Inc.) as described previously<sup>134</sup>.

725

726 **Proteasome activity assays**

727 20,000 cells per well were plated in a 96-well plate using standard culture medium, and on the  
728 following day the medium was changed. 10  $\mu$ M epoxomicin in the medium was used as negative  
729 control. 3 hours later, the ProteasomeGlo Cell-Based Assay (Promega) was used to measure  
730 proteasome catalytic activity. Chymotrypsin-like, trypsin-like and caspase-like activities were  
731 measured separately using the relevant substrates from Promega (Suc-LLVY-Glo, Z-LRR-Glo, Z-  
732 nLPnLD-Glo respectively). Assay reagents were prepared according to the manufacturer's  
733 instructions. The 96-well plate was equilibrated to room temperature, and a volume of assay reagent  
734 equal to the volume of medium was added to each well before shaking at 700 rpm for 2 minutes. The  
735 plate was incubated at room temperature for a further 10 minutes, and then luminescence was  
736 measured using the Tecan Spark 10M microplate reader, recording counts for 1 second. The  
737 luminescence readings from the epoxomicin controls represent background protease activity, and so  
738 this was subtracted from all other recordings.

739

740 **Measurement of translation rate**

741 WT and CKO mouse lung fibroblasts were grown to confluence in 48-well plates, and medium was  
742 changed 24h before the experiment to either low (1%) or high (10%) serum. The cells were pulsed  
743 with 0.1 mCi/ml  $^{35}$ S-L-methionine/ $^{35}$ S-L-cysteine mix (EasyTag™ EXPRESS35S Protein Labeling  
744 Mix, Perkin Elmer) in cysteine/methionine-free DMEM for 15 min at 37°C, with or without serum  
745 supplement. Afterwards, cells were washed with ice-cold PBS and lysed in digitonin-based buffer  
746 (with protease inhibitor tablet, added freshly) on ice. Lysates were reduced with LDS buffer and run  
747 on 4-12% Bis-Tris SDS-PAGE using MES buffer. Gels were then dried at 80°C and exposed  
748 overnight to a phosphorimager screen. Images were acquired with Typhoon FLA700 gel scanner and  
749 quantified using Fiji.

750

751 For the puromycin pulse experiment, cells were seeded (in the presence of 1 mM luciferin) in  
752 fibronectin-coated dishes at high density one day before starting the experiment. Separate 6-well  
753 plates were used for each time point. 30 minutes before the start of the experiment, cells were  
754 synchronised by a dexamethasone pulse (10 nM), after which cells were exchanged into Air medium  
755 (DMEM without glucose, L-glutamine, phenol red, sodium pyruvate and sodium bicarbonate (Sigma).  
756 The following were added: 0.35 g/L sodium bicarbonate (Sigma), 5 g/L glucose (Sigma), 20 mM  
757 MOPS (VWR), penicillin/streptomycin solution (as above), Glutamax (Thermo Fisher), B27  
758 (Thermo Fisher), 1 mM potassium luciferin solution (Biosyth), 1% FetalClone III serum. The medium  
759 was adjusted to pH 7.6 at room temperature, and osmolality adjusted to 350-360 mOsm/kg using  
760 sodium chloride). At the indicated time points, 10 µg/mL puromycin was added while keeping cells  
761 warm on a hot plate, after which the plate was incubated in tissue culture incubator for exactly 10  
762 minutes. Timepoint 0 represents cells just before the dexamethasone pulse. Cells were then washed  
763 with ice-cold PBS, after which they were lysed in lysis buffer (50 mM tris, pH 7.5, 1% Triton X-  
764 100, 0.1% SDS, 1.5 mM MgCl<sub>2</sub>, 100 mM NaCl, cOmplete protease inhibitor cocktail (Roche)) and  
765 flash frozen. For Western blot analysis, samples were spun down, diluted in Laemmli sample buffer,  
766 ran on 4-20% gradient gels, and blots were probed for ATF4 and tubulin.

767

## 768 **Animal work**

769 All animals were maintained in 12:12 hour light:dark conditions. Post-mortem histopathology  
770 examinations were carried out by Abbey Veterinary Services, UK. For the *in vivo* stress marker  
771 experiment, animals received an IP injection of bortezomib (Generon) (2.5 mg/kg) or vehicle control  
772 (1% DMSO in sterile PBS) 2 hours after the transition to the light phase. 5 hours later, the animals  
773 were culled and lungs were immediately flash frozen in liquid nitrogen. Tissues were homogenised  
774 on ice in RIPA buffer (as above) and flash frozen. After thawing these samples on ice, they were  
775 sonicated briefly at 4°C. Samples were clarified by centrifugation and protein diluted to 2 mg/mL.  
776 Bolt/NuPage loading buffer with 50 mM TCEP (final concentration) was added and reduced for 10

777 minutes at 70°C. Western blots were then carried out as described above, probing against phospho-  
778 STAT3 (Tyr705) or actin. One female mouse and one male mouse of each genotype were used in this  
779 experiment.

780

781 **Antibodies**

| <b>Antibody</b>             | <b>Host</b> | <b>Cat. #</b> | <b>Manufacturer</b>         | <b>Dilution</b> |
|-----------------------------|-------------|---------------|-----------------------------|-----------------|
| Anti-mouse-HRP              | Goat        | A4416         | Sigma                       | 1:10000         |
| Anti-rabbit-HRP             | Goat        | A6154         | Sigma                       | 1:10000         |
| Anti-rat-HRP                | Goat        | 629520        | Thermo                      | 1:10000         |
| Tubulin YL1-2               | Rat         |               | in-house                    | 1:100           |
| $\beta$ -Actin              | Mouse       | sc-47778      | Santa-Cruz<br>Biotechnology | 1:1000          |
| Proteasome 20S $\alpha$ 1-7 | Mouse       | ab22674       | Abcam                       | 1:2000          |
| EIF2 $\alpha$               | Mouse       | AhO0802       | Thermo                      | 1:1000          |
| P-EIF2 $\alpha$ (S51)       | Rabbit      | ab32157       | Abcam                       | 1:1000          |
| P-STAT3 (Tyr705)            | Rabbit      | D3A7          | Cell Signaling              | 1:1000          |
| Histone H3                  | Rabbit      | ab1791        | Abcam                       | 1:10000         |

782

783 **Acknowledgements**

784 We thank biomedical technical staff at Medical Research Council (MRC) Ares facility and LMB  
785 facilities for assistance; G.T. van der Horst and J.S. Takahashi for sharing rodent models; Y-G. Suh,  
786 M.H. Hastings and E.S. Maywood for providing reagents and input; M. Hegde, E. Zavodszky, R.  
787 Edgar, N. Hoyle, M. Coetzee, J. Chesham, A. Hufnagel, P. Crosby, D.S. Tourigny, J.E. Chambers,  
788 H.C. Causton and Tim Stevens for assistance with analysis and experiments as well as valuable  
789 discussion. DCSW was supported by the MRC Doctoral Training Programme and the Frank Edward  
790 Elmore Fund. AS was supported by the AstraZeneca Blue Skies Initiative. NMR was supported by  
791 the Medical Research Council (MR/S022023/1). MP was supported by the Dutch Cancer Foundation  
792 (KWF, BUIT-2014-6637) and EMBO (ALTF-654-2014). JON was supported by the Medical  
793 Research Council (MC\_UP\_1201/4) and the Wellcome Trust (093734/Z/10/Z).

794

795 **Contributions**

796 DCSW, ES and JON designed the study, analysed the data and wrote the manuscript; DCSW, ES,  
797 AS, AZ and MP performed cell experiments; SPC and JD performed mass spectrometry analyses;  
798 DCSW, NMR, ADB and JON performed mouse studies; MR performed tissue collection and  
799 husbandry. All authors commented on the manuscript.

800

801 **Conflicts of interest**

802 The authors declare that they have no conflict of interest.

803

804 **References**

- 805 1. Wolff, S., Weissman, J. S. & Dillin, A. Differential Scales of Protein Quality Control. *Cell*  
806 **157**, 52–64 (2014).
- 807 2. Juskiewicz, S. & Hegde, R. S. Quality Control of Orphaned Proteins. *Molecular Cell* vol. 71  
808 443–457 (2018).
- 809 3. Harper, J. W. & Bennett, E. J. Proteome complexity and the forces that drive proteome  
810 imbalance. *Nature* **537**, 328–338 (2016).
- 811 4. Labbadia, J. & Morimoto, R. I. The Biology of Proteostasis in Aging and Disease. *Annu. Rev.*  
812 *Biochem.* **84**, 435–464 (2015).
- 813 5. Balchin, D., Hayer-Hartl, M. & Hartl, F. U. In vivo aspects of protein folding and quality  
814 control. *Science* **353**, aac4354 (2016).
- 815 6. Cederroth, C. R. *et al.* Medicine in the Fourth Dimension. *Cell Metabolism* vol. 30 238–250  
816 (2019).
- 817 7. Wong, D. C. & O’Neill, J. S. Non-transcriptional processes in circadian rhythm generation.  
818 *Curr. Opin. Physiol.* **5**, 117–132 (2018).
- 819 8. Crosby, P. *et al.* Insulin/IGF-1 Drives PERIOD Synthesis to Entrain Circadian Rhythms with  
820 Feeding Time. *Cell* **177**, 896-909.e20 (2019).
- 821 9. Hoyle, N. P. *et al.* Circadian actin dynamics drive rhythmic fibroblast mobilization during  
822 wound healing. *Sci. Transl. Med.* **9**, eaal2774 (2017).
- 823 10. Reddy, A. B. *et al.* Circadian Orchestration of the Hepatic Proteome. *Curr. Biol.* **16**, 1107–  
824 1115 (2006).
- 825 11. Robles, M. S., Cox, J. & Mann, M. In-Vivo Quantitative Proteomics Reveals a Key  
826 Contribution of Post-Transcriptional Mechanisms to the Circadian Regulation of Liver  
827 Metabolism. *PLoS Genet.* **10**, (2014).
- 828 12. Mauvoisin, D. *et al.* Circadian clock-dependent and -independent rhythmic proteomes  
829 implement distinct diurnal functions in mouse liver. *Proc. Natl. Acad. Sci. U. S. A.* **111**, 167–

- 830 72 (2014).
- 831 13. Aragón, J. J. & Sols, A. Regulation of enzyme activity in the cell: effect of enzyme  
832 concentration. *FASEB J.* **5**, 2945–2950 (1991).
- 833 14. Bulik, S., Holzhütter, H. G. & Berndt, N. The relative importance of kinetic mechanisms and  
834 variable enzyme abundances for the regulation of hepatic glucose metabolism - insights from  
835 mathematical modeling. *BMC Biol.* **14**, (2016).
- 836 15. Rocca, J. D. *et al.* Relationships between protein-encoding gene abundance and corresponding  
837 process are commonly assumed yet rarely observed. *ISME Journal* vol. 9 1693–1699 (2015).
- 838 16. Nadaraia, S., Yohrling, G. J., Jiang, G. C.-T., Flanagan, J. M. & Vrana, K. E. Enzyme Activity:  
839 Control. in *Encyclopedia of Life Sciences* (John Wiley & Sons, Ltd, 2007).  
840 doi:10.1002/9780470015902.a0000861.pub2.
- 841 17. Ukai, H. & Ueda, H. R. Systems Biology of Mammalian Circadian Clocks. *Annu. Rev. Physiol.*  
842 **72**, 579–603 (2010).
- 843 18. Takahashi, J. S. Transcriptional architecture of the mammalian circadian clock. *Nat. Rev.*  
844 *Genet.* **18**, 164–179 (2016).
- 845 19. Liu, Y., Beyer, A. & Aebersold, R. On the Dependency of Cellular Protein Levels on mRNA  
846 Abundance. *Cell* vol. 165 535–550 (2016).
- 847 20. Franks, A., Airoidi, E. & Slavov, N. Post-transcriptional regulation across human tissues. *PLoS*  
848 *Comput. Biol.* **13**, (2017).
- 849 21. Wang, S. H., Hsiao, C. J., Khan, Z. & Pritchard, J. K. Post-translational buffering leads to  
850 convergent protein expression levels between primates. *Genome Biol.* **19**, (2018).
- 851 22. Ye, R. *et al.* Dual modes of CLOCK:BMAL1 inhibition mediated by Cryptochrome and Period  
852 proteins in the mammalian circadian clock. *Genes Dev.* **28**, 1989–98 (2014).
- 853 23. Chiou, Y.-Y. *et al.* Mammalian Period represses and de-represses transcription by displacing  
854 CLOCK-BMAL1 from promoters in a Cryptochrome-dependent manner. *Proc. Natl. Acad.*  
855 *Sci. U. S. A.* **113**, E6072–E6079 (2016).



- 856 24. Correia, S. P. *et al.* The circadian E3 ligase complex SCFFBXL3+CRY targets TLK2. *Sci. Rep.*  
857 **9**, 198 (2019).
- 858 25. Kume, K. *et al.* mCRY1 and mCRY2 are essential components of the negative limb of the  
859 circadian clock feedback loop. *Cell* **98**, 193–205 (1999).
- 860 26. Sato, T. K. *et al.* Feedback repression is required for mammalian circadian clock function. *Nat.*  
861 *Genet.* **38**, 312–319 (2006).
- 862 27. van der Horst, G. T. *et al.* Mammalian Cry1 and Cry2 are essential for maintenance of circadian  
863 rhythms. *Nature* **398**, 627–30 (1999).
- 864 28. Ukai-Tadenuma, M. *et al.* Delay in feedback repression by cryptochrome 1 Is required for  
865 circadian clock function. *Cell* **144**, 268–281 (2011).
- 866 29. Ode, K. L. *et al.* Knockout-Rescue Embryonic Stem Cell-Derived Mouse Reveals Circadian-  
867 Period Control by Quality and Quantity of CRY1. *Mol. Cell* **65**, 176–190 (2017).
- 868 30. Cox, K. H. & Takahashi, J. S. Circadian clock genes and the transcriptional architecture of the  
869 clock mechanism. *J. Mol. Endocrinol.* **63**, R93–R102 (2019).
- 870 31. Maywood, E. S., Chesham, J. E., O’Brien, J. A. & Hastings, M. H. A diversity of paracrine  
871 signals sustains molecular circadian cycling in suprachiasmatic nucleus circuits. *Proc. Natl.*  
872 *Acad. Sci.* **108**, 14306–14311 (2011).
- 873 32. Ono, D., Honma, S. & Honma, K. Cryptochromes are critical for the development of coherent  
874 circadian rhythms in the mouse suprachiasmatic nucleus. *Nat. Commun.* **4**, 1666 (2013).
- 875 33. Putker, M. *et al.* CRYPTOCHROMES confer robustness, not rhythmicity, to circadian  
876 timekeeping. *EMBO J.* **e106745**, 1–15 (2021).
- 877 34. Beale, A. D. *et al.* Casein Kinase 1 Underlies Temperature Compensation of Circadian  
878 Rhythms in Human Red Blood Cells. *J. Biol. Rhythms* **34**, 144–153 (2019).
- 879 35. Cho, C.-S., Yoon, H. J., Kim, J. Y., Woo, H. A. & Rhee, S. G. Circadian rhythm of  
880 hyperoxidized peroxiredoxin II is determined by hemoglobin autoxidation and the 20S  
881 proteasome in red blood cells. *Proc. Natl. Acad. Sci.* **111**, 12043–12048 (2014).

- 882 36. Henslee, E. A. *et al.* Rhythmic potassium transport regulates the circadian clock in human red  
883 blood cells. *Nat. Commun.* **8**, 1978 (2017).
- 884 37. Ray, S. *et al.* Circadian rhythms in the absence of the clock gene *Bmal1*. *Science (80-. )*. **367**,  
885 800–806 (2020).
- 886 38. Lipton, J. O. *et al.* The Circadian Protein BMAL1 Regulates Translation in Response to S6K1-  
887 Mediated Phosphorylation. *Cell* **161**, 1138–1151 (2015).
- 888 39. Yu, E. A. & Weaver, D. R. Disrupting the circadian clock: Gene-specific effects on aging,  
889 cancer, and other phenotypes. *Aging* vol. 3 479–493 (2011).
- 890 40. Maury, E., Ramsey, K. M. & Bass, J. Circadian rhythms and metabolic syndrome: From  
891 experimental genetics to human disease. *Circulation Research* vol. 106 447–462 (2010).
- 892 41. Mauvoisin, D. *et al.* Circadian and Feeding Rhythms Orchestrate the Diurnal Liver Acetylome.  
893 *Cell Rep.* **20**, 1729–1743 (2017).
- 894 42. Kriebs, A. *et al.* Circadian repressors CRY1 and CRY2 broadly interact with nuclear receptors  
895 and modulate transcriptional activity. *Proc. Natl. Acad. Sci.* **114**, 8776–8781 (2017).
- 896 43. Papp, S. J. *et al.* DNA damage shifts circadian clock time via hausp-dependent cry1  
897 stabilization. *Elife* **2015**, 1–19 (2015).
- 898 44. Jordan, S. D. *et al.* CRY1/2 Selectively Repress PPAR $\delta$  and Limit Exercise Capacity. *Cell*  
899 *Metab.* **26**, 243-255.e6 (2017).
- 900 45. Koike, N. *et al.* Transcriptional architecture and chromatin landscape of the core circadian  
901 clock in mammals. *Science* **338**, 349–54 (2012).
- 902 46. Elowitz, M. B., Levine, A. J., Siggia, E. D. & Swain, P. S. Stochastic gene expression in a  
903 single cell. *Science (80-. )*. **297**, 1183–1186 (2002).
- 904 47. Raser, J. M. & O’Shea, E. K. Control of stochasticity in eukaryotic gene expression. *Science*  
905 *(80-. )*. **304**, 1811–1814 (2004).
- 906 48. Volfson, D. *et al.* Origins of extrinsic variability in eukaryotic gene expression. *Nature* **439**,  
907 861–864 (2006).

- 908 49. Sigal, A. *et al.* Variability and memory of protein levels in human cells. *Nature* **444**, 643–646  
909 (2006).
- 910 50. Pedraza, J. H. & Van Oudenaarden, A. Noise propagations in gene networks. *Science* (80-. ).  
911 **307**, 1965–1969 (2005).
- 912 51. Robles, M. S., Humphrey, S. J. & Mann, M. Phosphorylation Is a Central Mechanism for  
913 Circadian Control of Metabolism and Physiology. *Cell Metab.* **0**, 35–48 (2016).
- 914 52. Gnad, F., Gunawardena, J. & Mann, M. PHOSIDA 2011: The posttranslational modification  
915 database. *Nucleic Acids Res.* **39**, 253–260 (2011).
- 916 53. Gnad, F. *et al.* PHOSIDA (phosphorylation site database): Management, structural and  
917 evolutionary investigation, and prediction of phosphosites. *Genome Biol.* **8**, (2007).
- 918 54. Harper, J. W. & Bennett, E. J. Proteome complexity and the forces that drive proteome  
919 imbalance. *Nature* **537**, 328–338 (2016).
- 920 55. Fortelny, N., Overall, C. M., Pavlidis, P. & Freue, G. V. C. Can we predict protein from mRNA  
921 levels? *Nature* **547**, E19–E20 (2017).
- 922 56. Stitt, M. & Gibon, Y. Why measure enzyme activities in the era of systems biology? *Trends*  
923 *in Plant Science* vol. 19 256–265 (2014).
- 924 57. Brunner, A.-D. *et al.* Ultra-high sensitivity mass spectrometry quantifies single-cell proteome  
925 changes upon perturbation. *bioRxiv* 2020.12.22.423933 (2021)  
926 doi:10.1101/2020.12.22.423933.
- 927 58. Deery, M. J. *et al.* Proteomic analysis reveals the role of synaptic vesicle cycling in sustaining  
928 the suprachiasmatic circadian clock. *Curr. Biol.* **19**, 2031–6 (2009).
- 929 59. Rey, G. *et al.* Metabolic oscillations on the circadian time scale in *Drosophila* cells lacking  
930 clock genes. *Mol. Syst. Biol.* **14**, e8376 (2018).
- 931 60. Hurley, J. M. *et al.* Circadian Proteomic Analysis Uncovers Mechanisms of Post-  
932 Transcriptional Regulation in Metabolic Pathways. *Cell Syst.* **7**, 613–626.e5 (2018).
- 933 61. Vogel, C. & Marcotte, E. M. Insights into the regulation of protein abundance from proteomic

- 934 and transcriptomic analyses. *Nat. Rev. Genet.* **13**, 227–232 (2012).
- 935 62. Buccitelli, C. & Selbach, M. mRNAs, proteins and the emerging principles of gene expression  
936 control. *Nat. Rev. Genet.* **21**, 630–644 (2020).
- 937 63. Schwanhäusser, B. *et al.* Global quantification of mammalian gene expression control. *Nature*  
938 **473**, 337–342 (2011).
- 939 64. Liu, Y., Beyer, A. & Aebersold, R. On the Dependency of Cellular Protein Levels on mRNA  
940 Abundance. *Cell* **165**, 535–550 (2016).
- 941 65. Morimoto, R. I. & Cuervo, A. M. Protein homeostasis and aging: Taking care of proteins from  
942 the cradle to the grave. in *Journals of Gerontology - Series A Biological Sciences and Medical*  
943 *Sciences* vol. 64 167–170 (J Gerontol A Biol Sci Med Sci, 2009).
- 944 66. Klaips, C. L., Jayaraj, G. G. & Hartl, F. U. Pathways of cellular proteostasis in aging and  
945 disease. *Journal of Cell Biology* vol. 217 51–63 (2018).
- 946 67. O’Neill, J. S. *et al.* Eukaryotic cell biology is temporally coordinated to support the energetic  
947 demands of protein homeostasis. *Nat. Commun.* **11**, (2020).
- 948 68. Lipton, J. O. *et al.* Aberrant Proteostasis of BMAL1 Underlies Circadian Abnormalities in a  
949 Paradigmatic mTOR-opathy. *Cell Rep.* **20**, 868–880 (2017).
- 950 69. Freedman, J. *Cell Physiology Source Book.* (Academic Press, 2012).  
951 doi:<https://doi.org/10.1016/B978-0-12-387738-3.00001-9>.
- 952 70. Choe, K. P. & Strange, K. Genome-wide RNAi screen and in vivo protein aggregation  
953 reporters identify degradation of damaged proteins as an essential hypertonic stress response.  
954 *Am. J. Physiol. - Cell Physiol.* **295**, (2008).
- 955 71. Stangherlin, A. *et al.* Compensatory ion transport buffers daily protein rhythms to regulate  
956 osmotic balance and cellular physiology. *bioRxiv* 2020.05.28.118398 (2020)  
957 doi:10.1101/2020.05.28.118398.
- 958 72. Pakos-Zebrucka, K. *et al.* The integrated stress response. *EMBO Rep.* **17**, 1374–1395 (2016).
- 959 73. Kroemer, G., Mariño, G. & Levine, B. Autophagy and the integrated stress response. *Mol. Cell*

- 960           **40**, 280–93 (2010).
- 961   74.   Heifetz, A., Keenan, R. W. & Elbein, A. D. Mechanism of action of tunicamycin on the UDP-  
962   GlcNAc:dolichyl-phosphate GlcNAc-1-phosphate transferase. *Biochemistry* **18**, 2186–2192  
963   (1979).
- 964   75.   Osowski, C. M. & Urano, F. Measuring ER stress and the unfolded protein response using  
965   mammalian tissue culture system. *Methods Enzymol.* **490**, 71–92 (2011).
- 966   76.   Komar, A. A. & Merrick, W. C. A retrospective on EIF2A—and not the alpha subunit of EIF2.  
967   *International Journal of Molecular Sciences* vol. 21 (2020).
- 968   77.   Schleich, S. *et al.* DENR-MCT-1 promotes translation re-initiation downstream of uORFs to  
969   control tissue growth. *Nature* **512**, 208–212 (2014).
- 970   78.   Sendoel, A. *et al.* Translation from unconventional 5' start sites drives tumour initiation.  
971   *Nature* **541**, 494–499 (2017).
- 972   79.   Kim, J. H., Park, S. M., Park, J. H., Keum, S. J. & Jang, S. K. EIF2A mediates translation of  
973   hepatitis C viral mRNA under stress conditions. *EMBO J.* **30**, 2454–2464 (2011).
- 974   80.   Xu, S. *et al.* Phospho-Tyr705 of STAT3 is a therapeutic target for sepsis through regulating  
975   inflammation and coagulation. *Cell Commun. Signal.* **18**, (2020).
- 976   81.   Hu, D. *et al.* Essential role of IL-10/STAT3 in chronic stress-induced immune suppression.  
977   *Brain. Behav. Immun.* **36**, 118–127 (2014).
- 978   82.   Yu, H., Pardoll, D. & Jove, R. STATs in cancer inflammation and immunity: A leading role  
979   for STAT3. *Nature Reviews Cancer* vol. 9 798–809 (2009).
- 980   83.   Dibner, C. *et al.* Circadian gene expression is resilient to large fluctuations in overall  
981   transcription rates. *EMBO J.* **28262**, 123–134 (2009).
- 982   84.   Putker, M. *et al.* Mammalian circadian period, but not phase and amplitude, is robust against  
983   redox and metabolic perturbations. *Antioxid. Redox Signal.* **4523**, ars.2016.6911 (2017).
- 984   85.   Vecchi, G. *et al.* Proteome-wide observation of the phenomenon of life on the edge of  
985   solubility. *Proc. Natl. Acad. Sci. U. S. A.* **117**, 1015–1020 (2020).

- 986 86. Hipp, M. S., Kasturi, P. & Hartl, F. U. The proteostasis network and its decline in ageing. *Nat.*  
987 *Rev. Mol. Cell Biol.* **20**, 421–435 (2019).
- 988 87. Chan, A. B., Huber, A. L. & Lamia, K. A. Cryptochromes modulate E2F family transcription  
989 factors. *Sci. Rep.* **10**, (2020).
- 990 88. Huber, A. L. *et al.* CRY2 and FBXL3 Cooperatively Degrade c-MYC. *Mol. Cell* **64**, 774–789  
991 (2016).
- 992 89. Liu, H. *et al.* The GID ubiquitin ligase complex is a regulator of AMPK activity and organismal  
993 lifespan. *Autophagy* **16**, 1618–1634 (2020).
- 994 90. Hoffmann, A. & Spengler, D. Chromatin remodeling complex NuRD in neurodevelopment  
995 and neurodevelopmental disorders. *Frontiers in Genetics* vol. 10 (2019).
- 996 91. Lombardi, L. M., Baker, S. A. & Zoghbi, H. Y. MECP2 disorders: From the clinic to mice and  
997 back. *Journal of Clinical Investigation* vol. 125 2914–2923 (2015).
- 998 92. Scheffner, M. & Kumar, S. Mammalian HECT ubiquitin-protein ligases: Biological and  
999 pathophysiological aspects. *Biochim. Biophys. Acta - Mol. Cell Res.* **1843**, 61–74 (2014).
- 1000 93. Zhou, W., Wei, W. & Sun, Y. Genetically engineered mouse models for functional studies of  
1001 SKP1-CUL1-F-box-protein (SCF) E3 ubiquitin ligases. *Cell Research* vol. 23 599–619 (2013).
- 1002 94. Yerbury, J. J., Farrawell, N. E. & McAlary, L. Proteome Homeostasis Dysfunction: A Unifying  
1003 Principle in ALS Pathogenesis. *Trends in Neurosciences* vol. 43 274–284 (2020).
- 1004 95. Costa-Mattioli, M. & Walter, P. The integrated stress response: From mechanism to disease.  
1005 *Science (New York, N.Y.)* vol. 368 (2020).
- 1006 96. Hafycz, J. M. & Naidoo, N. N. Sleep, aging, and cellular health: Aged-related changes in sleep  
1007 and protein homeostasis converge in neurodegenerative diseases. *Frontiers in Aging*  
1008 *Neuroscience* vol. 11 (2019).
- 1009 97. Hadizadeh Esfahani, A., Sverchkova, A., Saez-Rodriguez, J., Schuppert, A. A. & Brehme, M.  
1010 A systematic atlas of chaperome deregulation topologies across the human cancer landscape.  
1011 *PLoS Comput. Biol.* **14**, (2018).

- 1012 98. Agyemang, A. F., Harrison, S. R., Siegel, R. M. & McDermott, M. F. Protein misfolding and  
1013 dysregulated protein homeostasis in autoinflammatory diseases and beyond. *Seminars in*  
1014 *Immunopathology* vol. 37 335–347 (2015).
- 1015 99. Yalcin, A. & Hotamisligil, G. S. Impact of ER protein homeostasis on metabolism. *Diabetes*  
1016 vol. 62 691–693 (2013).
- 1017 100. Bur, I. M. *et al.* The circadian clock components CRY1 and CRY2 are necessary to sustain sex  
1018 dimorphism in mouse liver metabolism. *J. Biol. Chem.* **284**, 9066–73 (2009).
- 1019 101. Masuki, S., Todo, T., Nakano, Y., Okamura, H. & Nose, H. Reduced  $\alpha$ -adrenoceptor  
1020 responsiveness and enhanced baroreflex sensitivity in Cry-deficient mice lacking a biological  
1021 clock. *J. Physiol.* **566**, 213–224 (2005).
- 1022 102. Chan, A. B. & Lamia, K. A. Cancer, hear my battle CRY. *J. Pineal Res.* e12658 (2020)  
1023 doi:10.1111/jpi.12658.
- 1024 103. Kettner, N. M. *et al.* Circadian Homeostasis of Liver Metabolism Suppresses  
1025 Hepatocarcinogenesis. *Cancer Cell* **30**, 909–924 (2016).
- 1026 104. Lee, S., Donehower, L. A., Herron, A. J., Moore, D. D. & Fu, L. Disrupting Circadian  
1027 Homeostasis of Sympathetic Signaling Promotes Tumor Development in Mice. *PLoS One* **5**,  
1028 e10995 (2010).
- 1029 105. Mteyrek, A. *et al.* Critical cholangiocarcinogenesis control by cryptochrome clock genes. *Int.*  
1030 *J. Cancer* **140**, 2473–2483 (2017).
- 1031 106. Cao, Q. *et al.* Circadian clock cryptochrome proteins regulate autoimmunity. *Proc. Natl. Acad.*  
1032 *Sci. U. S. A.* **114**, 12548–12553 (2017).
- 1033 107. Hand, L. E. *et al.* The circadian clock regulates inflammatory arthritis. *FASEB J.* **30**, 3759–  
1034 3770 (2016).
- 1035 108. Narasimamurthy, R. *et al.* Circadian clock protein cryptochrome regulates the expression of  
1036 proinflammatory cytokines. *Proc. Natl. Acad. Sci. U. S. A.* **109**, 12662–12667 (2012).
- 1037 109. Barclay, J. L. *et al.* High-fat diet-induced hyperinsulinemia and tissue-specific insulin



- 1038 resistance in Cry-deficient mice. *AJP Endocrinol. Metab.* **304**, E1053–E1063 (2013).
- 1039 110. Danziger, J. & Zeidel, M. L. Osmotic homeostasis. *Clin. J. Am. Soc. Nephrol.* **10**, 852–62  
1040 (2015).
- 1041 111. Hoffmann, E. K., Lambert, I. H. & Pedersen, S. F. Physiology of Cell Volume Regulation in  
1042 Vertebrates. *Physiol. Rev.* **89**, 193–277 (2009).
- 1043 112. Dunlap, J. C. Molecular Bases for Circadian Clocks. *Cell* **96**, 271–290 (1999).
- 1044 113. Wang, D. *et al.* A deep proteome and transcriptome abundance atlas of 29 healthy human  
1045 tissues. *Mol. Syst. Biol.* **15**, (2019).
- 1046 114. Shiber, A. *et al.* Cotranslational assembly of protein complexes in eukaryotes revealed by  
1047 ribosome profiling. *Nature* **561**, 268–272 (2018).
- 1048 115. Nangle, S. N. *et al.* Molecular assembly of the period-cryptochrome circadian transcriptional  
1049 repressor complex. *Elife* **3**, e03674 (2014).
- 1050 116. Jouffe, C. *et al.* The Circadian Clock Coordinates Ribosome Biogenesis. *PLoS Biol.* **11**, (2013).
- 1051 117. Lamia, K. A. *et al.* Cryptochromes mediate rhythmic repression of the glucocorticoid receptor.  
1052 *Nature* **480**, 552–556 (2011).
- 1053 118. Vollmers, C. *et al.* Time of feeding and the intrinsic circadian clock drive rhythms in hepatic  
1054 gene expression. *Proc. Natl. Acad. Sci.* **106**, 21453–21458 (2009).
- 1055 119. Feltham, J. *et al.* Transcriptional changes are regulated by metabolic pathway dynamics but  
1056 decoupled from protein levels. *bioRxiv* 833921 (2019) doi:10.1101/833921.
- 1057 120. Ohtsuki, S. *et al.* Simultaneous absolute protein quantification of transporters, cytochromes  
1058 P450, and UDP-glucuronosyltransferases as a novel approach for the characterization of  
1059 individual human liver: Comparison with mRNA levels and activities. *Drug Metab. Dispos.*  
1060 **40**, 83–92 (2012).
- 1061 121. Cheng, Z. *et al.* Differential dynamics of the mammalian mRNA and protein expression  
1062 response to misfolding stress. *Mol. Syst. Biol.* **12**, 855 (2016).
- 1063 122. Zapalska-Sozoniuk, M., Chrobak, L., Kowalczyk, K. & Kankofer, M. Is it useful to use several



- 1064 “omics” for obtaining valuable results? *Molecular Biology Reports* vol. 46 3597–3606 (2019).
- 1065 123. Smith, J. R. & Whitney, R. G. Intraclonal variation in proliferative potential of human diploid  
1066 fibroblasts: stochastic mechanism for cellular aging. *Science* (80-. ). **207**, 82–84 (1980).
- 1067 124. Phinney, D. G. Functional heterogeneity of mesenchymal stem cells: Implications for cell  
1068 therapy. *Journal of Cellular Biochemistry* vol. 113 2806–2812 (2012).
- 1069 125. Causton, H. C., Feeney, K. A., Ziegler, C. A. & O’Neill, J. S. Metabolic Cycles in Yeast Share  
1070 Features Conserved among Circadian Rhythms. *Curr. Biol.* **25**, 1056–1062 (2015).
- 1071 126. Yoo, S.-H. *et al.* PERIOD2::LUCIFERASE real-time reporting of circadian dynamics reveals  
1072 persistent circadian oscillations in mouse peripheral tissues. *Proc. Natl. Acad. Sci. U. S. A.* **101**,  
1073 5339–46 (2004).
- 1074 127. Seluanov, A., Vaidya, A. & Gorbunova, V. Establishing Primary Adult Fibroblast Cultures  
1075 From Rodents. *J. Vis. Exp.* e2033–e2033 (2010) doi:10.3791/2033.
- 1076 128. Plubell, D. L. *et al.* Extended Multiplexing of Tandem Mass Tags (TMT) Labeling Reveals  
1077 Age and High Fat Diet Specific Proteome Changes in Mouse Epididymal Adipose Tissue. *Mol.*  
1078 *Cell. Proteomics* **16**, 873–890 (2017).
- 1079 129. Thaben, P. F. & Westermark, P. O. Detecting rhythms in time series with rain. *J. Biol. Rhythms*  
1080 **29**, 391–400 (2014).
- 1081 130. Eden, E., Navon, R., Steinfeld, I., Lipson, D. & Yakhini, Z. GOrilla: A tool for discovery and  
1082 visualization of enriched GO terms in ranked gene lists. *BMC Bioinformatics* **10**, (2009).
- 1083 131. Eden, E., Lipson, D., Yogev, S. & Yakhini, Z. Discovering motifs in ranked lists of DNA  
1084 sequences. *PLoS Comput. Biol.* **3**, 0508–0522 (2007).
- 1085 132. Deutsch, E. W. *et al.* The ProteomeXchange consortium in 2020: enabling ‘big data’  
1086 approaches in proteomics. *Nucleic Acids Res.* **48**, D1145–D1152 (2019).
- 1087 133. Perez-Riverol, Y. *et al.* The PRIDE database and related tools and resources in 2019:  
1088 improving support for quantification data. *Nucleic Acids Res.* **47**, D442–D450 (2018).
- 1089 134. Feeney, K. A. *et al.* Daily magnesium fluxes regulate cellular timekeeping and energy balance.

1090 *Nature* **532**, 375–379 (2016).

1091

1092

1093 **Figure legends**

1094 **Figure 1: Cell-autonomous rhythms in the proteome and phosphoproteome persist in the**  
1095 **absence of CRY. a)** An overview of the proteomics experimental workflow. Samples were taken  
1096 every 3 hours for 3 days in constant conditions, starting 24 h after medium change (“Experimental  
1097 time 0 h”). **b), c)** Volcano plots showing the fold change in average expression of all proteins and  
1098 phosphopeptides respectively, in CKO cells compared to WT ( $q$  = Benjamini-Hochberg corrected  $p$ -  
1099 value,  $n$ = 24 time points over 3 days). Statistically significant changes ( $q \leq 0.05$ ) are shown in red.  
1100 Some proteins are labelled as space allows. **d), e)** Venn diagrams showing the numbers of rhythmic  
1101 proteins and phosphopeptides respectively, in WT cells and CKO cells, with the overlaps annotated.  
1102 Mean relative amplitude of rhythmic (phospho)peptides are also provided.

1103

1104 **Figure 2: CRY regulates relative amplitude and phase of the rhythmic proteome and**  
1105 **phosphoproteome. a)** Fold-change in relative amplitude (RA) was calculated for each of the proteins  
1106 found to be rhythmic in both genotypes by RAIN analysis (i.e. no RA cut-off). The mean fold change  
1107 (log) in RA was an increase of 14% in CKO cells compared to WT cells (One sample t-test,  $p < 0.0001$ ).  
1108 **b)** For each genotype, all proteins were divided into 10 deciles of equal number, ranked by abundance.  
1109 The mean abundance of each decile was plotted against the proportion of the decile that was rhythmic.  
1110 Linear regression lines are shown for each genotype, and the slopes were significantly non-zero (F  
1111 test, WT  $p = 0.0016$ , CKO  $p < 0.0001$ ). The slopes were also significantly different to each other (F test,  
1112  $p = 0.0001$ ). **c)** Fold-change in relative amplitude (RA) was calculated for each of the phosphopeptides  
1113 found to be rhythmic in both genotypes by RAIN. On average, the RA was increased in CKO cells  
1114 compared to WT cells by 6% (One sample t-test,  $p < 0.05$ ). **d)** The same analysis in b) was carried out  
1115 for phosphopeptides. The slopes were significantly non-zero in CKO but not WT (F test, WT  $p = 0.3$ ,  
1116 CKO  $p = 0.04$ ). The slopes were also significantly different to each other (F test,  $p < 0.0001$ ). **e, f)**  
1117 Circular histograms showing the number of proteins at each rhythmic phase. Phase is defined and  
1118 estimated by RAIN, as the time of the first predicted peak in a 24-hour period. Concentric circles

1119 represent the counts scale, with the outermost circle marking the upper end of the counts. The  
1120 distributions of rhythmic proteins in CKO cells were significantly different to WT cells (left,  $p < 0.001$ ,  
1121 Watson's two-sample test). **g), h)** This was also the case for the proteins rhythmic in only one  
1122 genotype (right,  $p < 0.001$ , Watson's two-sample test). **i), j)** Circular histograms showing the number  
1123 of phosphopeptides at each rhythmic phase. The distributions of rhythmic phosphopeptides in CKO  
1124 cells was significantly different to WT cells ( $p < 0.001$ , Watson's two-sample test).

1125

1126 **Figure 3. CRYPTOCHROME regulates proteasome activity and translation rate.**

1127 **a)** From the quantitative proteomics experiment, average abundance of catalytic proteasome subunits  
1128 was calculated and normalised to WT means. Trypsin-like ( $\beta 2$ ), chymotrypsin-like ( $\beta 3$ ) and caspase-  
1129 like ( $\beta 1$ ) catalytic subunits are shown. The average was calculated from all 24 time points of the  
1130 proteomics experiment. Mean $\pm$ SD, 2-way ANOVA with Holm-Sidak's multiple comparisons. **b)**  
1131 Representative Western blot using an antibody that recognises all 7  $\alpha$  subunits of the 20S proteasome,  
1132 with anti-histone H3 as loading control. **c)** Quantification of the blots in b), using all replicates,  
1133 normalised to WT mean. Mean $\pm$ SD, one-tailed Student's t test with Welch correction – prior  
1134 prediction from experiment in A) that CKO abundance would be lower. **d)** Proteasome activity  
1135 measured using the ProteasomeGlo Assay (Promega), normalised to WT means. Mean $\pm$ SD, 2-way  
1136 ANOVA with Holm-Sidak's multiple comparisons. N=6 experiments, representative experiment  
1137 shown (n=4 technical replicates). **e)** Translation rate was measured using  $^{35}\text{S}$ -methionine labelling  
1138 and imaging with phosphor screens. The quantification values were normalised to the total protein  
1139 concentration as measured using Coomassie stain, and then normalised to WT mean. Mean $\pm$ SD,  
1140 Student's t test with Welch correction. N=3. **f)** Total protein mass per cell in confluent WT and CKO  
1141 cultures. Cells were grown in two 12-well plates; one was used for cell counting and the other was  
1142 used for lysis in RIPA buffer prior to protein quantification by BCA assay. Quantification shown,  
1143 normalised to WT mean. Mean $\pm$ SD, Student's t test with Welch correction.

1144

1145 **Figure 4. Rhythmic regulation of ion transport in WT and CKO cells.**

1146 **a)** Gene ontology analysis for rhythmic proteins was carried out using Gene ontology enrichment  
1147 analysis and visualisation (GORilla)<sup>130,131</sup>. Significantly rhythmic WT proteins were compared  
1148 against background (all proteins identified in the experiment), and the top non-overlapping GO  
1149 Biological Process terms shown, sorted according to FDR q-value. Fold enrichment is annotated on  
1150 each bar. The same GO analysis was carried out comparing proteins rhythmic that were rhythmic in  
1151 CKO cells **(b)** and for proteins that were rhythmic across both genotypes **(c)**. **d), e)** From one time-  
1152 course experiment, ions, cytosolic proteins and total protein were extracted in parallel samples. The  
1153 presented experiment is representative of 3 separate time-course experiments that were carried out  
1154 (N=3). Blue lines highlight the antiphasic relationship between oscillations in cytosolic protein and  
1155 potassium concentration. Mean±SEM, p-values from RAIN, red lines are fits by a damped cosine  
1156 compared with a straight line (null hypothesis). Parallel PER2::LUC recordings were also performed  
1157 and plotted as a phase marker. **f)** Examples of key ion transporters are shown, as detected in the  
1158 proteomics experiment. P values show the results of an F test comparing fits of damped cosine against  
1159 straight line. All proteins except WT NKCC1 had RAIN p-values <0.05. **g), h)** Relative amplitudes  
1160 of cytosolic protein and potassium concentrations oscillations in a) and b) were greater in CKO  
1161 compared to WT (Student's t test with Welch correction, mean±SD).

1162

1163 **Figure 5. CKO cells and tissues are more sensitive to stress.**

1164 **a)** WT and CKO cells were treated with 500 nM tunicamycin (TUN) and lysed in RIPA buffer at time  
1165 points between 0-24 hours afterwards. Western blots were carried out, probing for phosphorylated  
1166 eIF2 $\alpha$ , total eIF2 $\alpha$  and actin. Representative blots shown, n=4. **b)** Quantification of all replicates  
1167 represented in (a), where phosphorylated eIF2 $\alpha$  is normalised to total eIF2 $\alpha$ . Mean±SD. 2-way  
1168 ANOVA (TWA) with Holm-Sidak's multiple comparisons. **c)** Mouse lungs were collected 7 hours  
1169 after transition to the light phase, 5 hours after intraperitoneal injection of mice with bortezomib (BTZ,  
1170 2.5 mg/kg) or vehicle (Veh, 1% DMSO in sterile PBS). Tissues were lysed in RIPA buffer and

1171 western blots were performed, probing for phosphorylated STAT3, total STAT3 and actin. All  
1172 replicates shown, N=2 mice for each condition. **d)** Quantification of the blots shown in (c), where  
1173 phosphorylated STAT3 is normalised to total STAT3. Mean±SD. 2-way ANOVA (TWA) with Holm-  
1174 Sidak's multiple comparisons.

1175

1176 **Figure 6. WT cells recapitulate the CKO phenotype upon induced chronic stress.**

1177 **a)** WT PER2::LUC cells were treated with epoxomicin or vehicle control. Blue arrows show the time  
1178 points where drug was washed off. Mean±SD. **b)** Quantification of damping rate of the PER2::LUC  
1179 recordings shown in a), for the duration of drug treatment. Mean±SD. **c)** WT PER2::LUC cells were  
1180 treated with tunicamycin or vehicle control. Mean±SD. **d)** Quantification of damping rate of the  
1181 PER2::LUC recordings shown in c), for the duration of drug treatment. Mean±SD. **e)** WT  
1182 PER2::LUC cells were treated with radicicol or vehicle control. Blue arrows show the time points  
1183 where drug was washed off. Mean±SD. **f)** Quantification of damping rate of the PER2::LUC  
1184 recordings shown in e), for the duration of drug treatment. Mean±SD. **g)** Schematic diagram:  
1185 altogether our data suggests that in the absence of CRY, proteome imbalance disrupts circadian  
1186 rhythmicity of physiology. See text for details.

1187





**FIGURE 2**

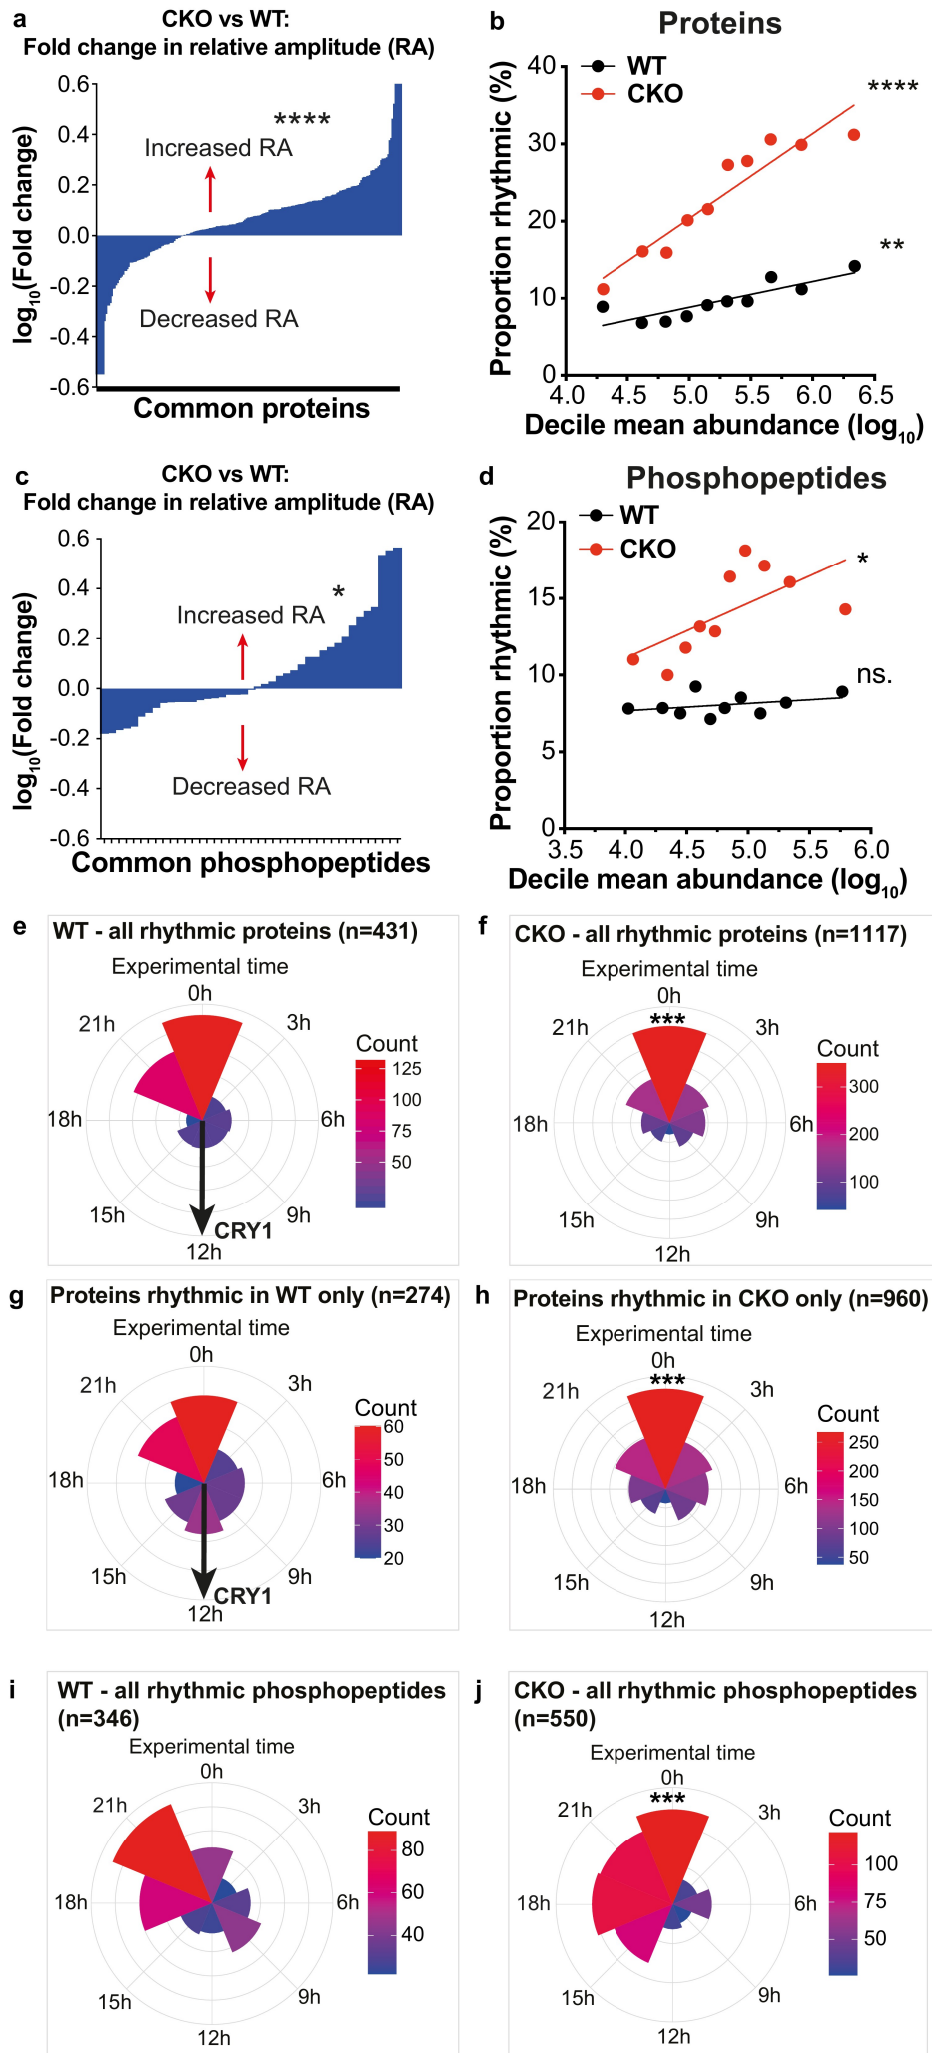



**FIGURE 3**

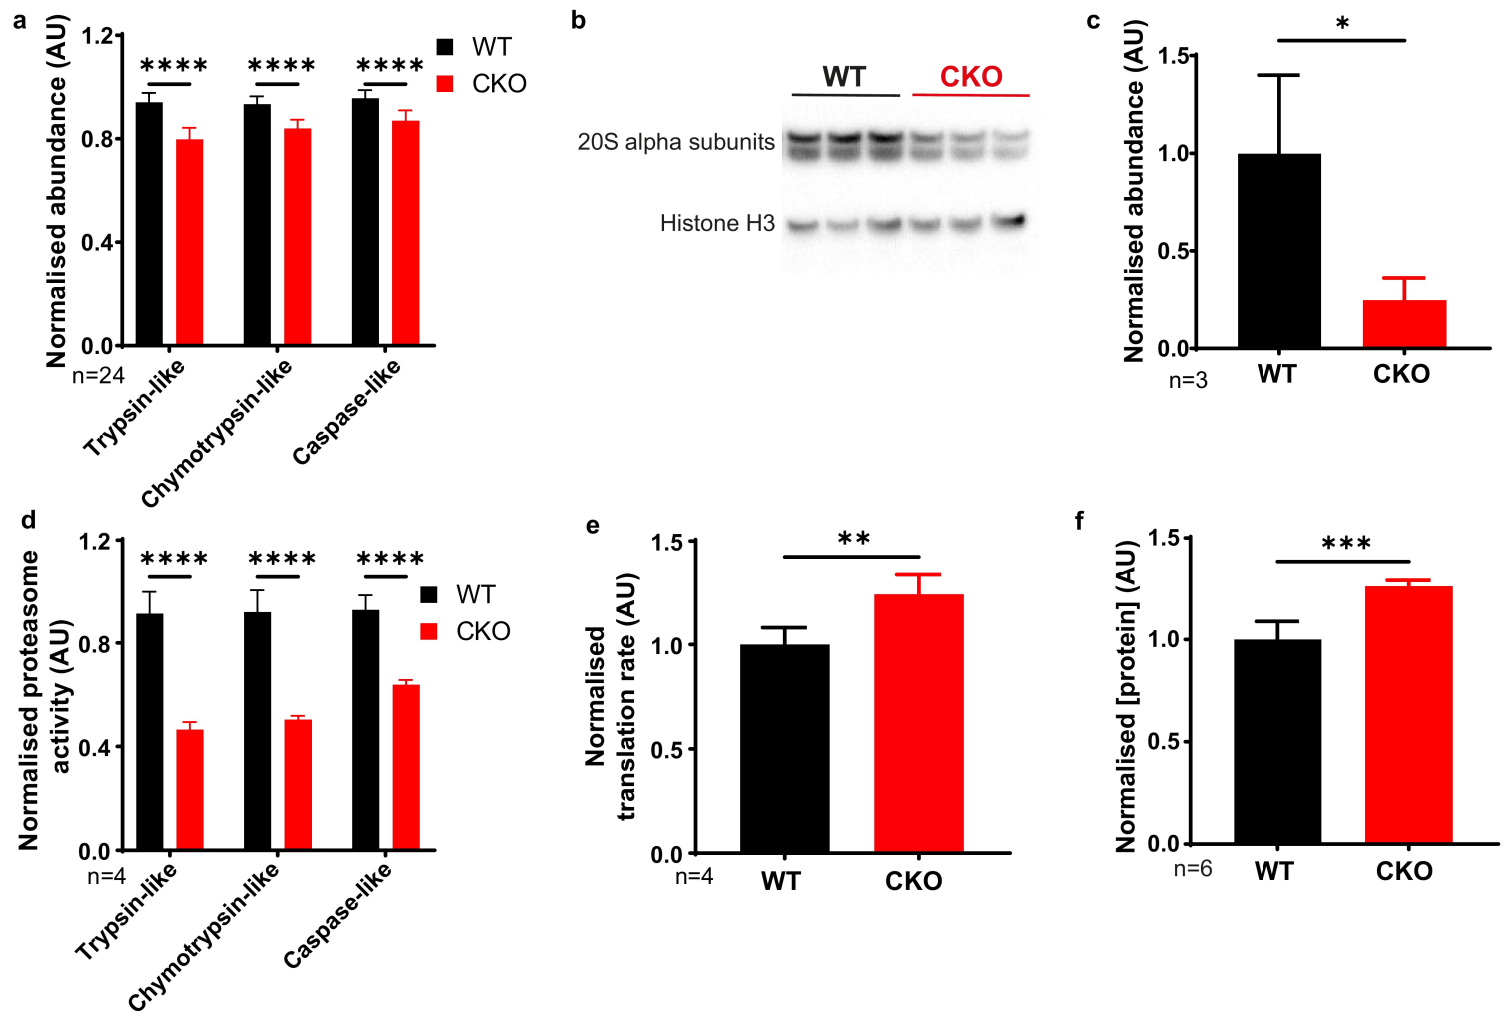

**FIGURE 4**

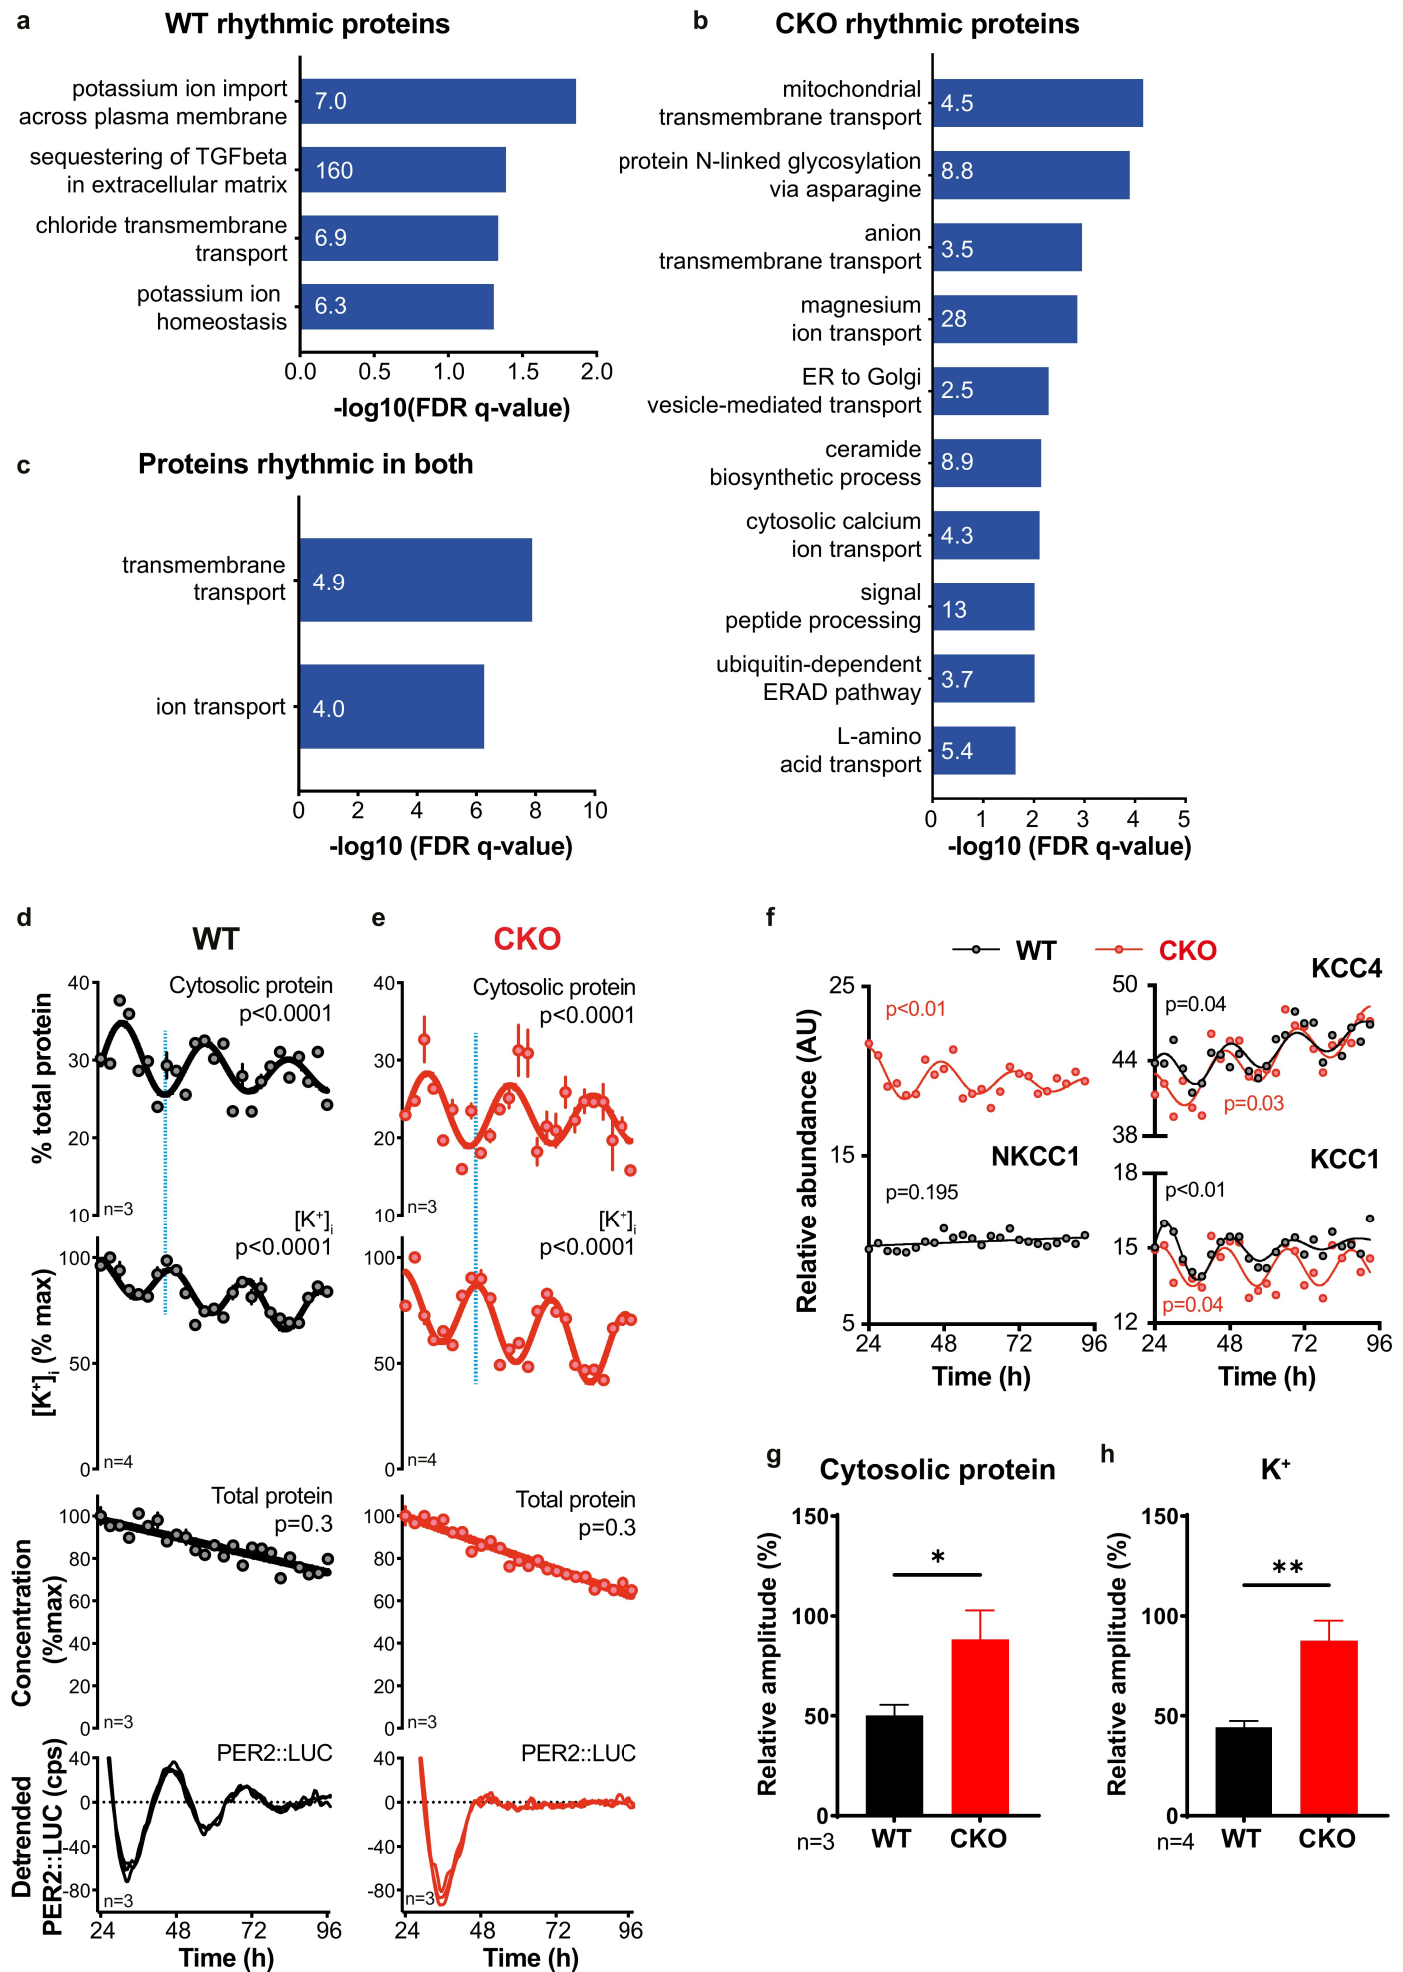

**FIGURE 5**

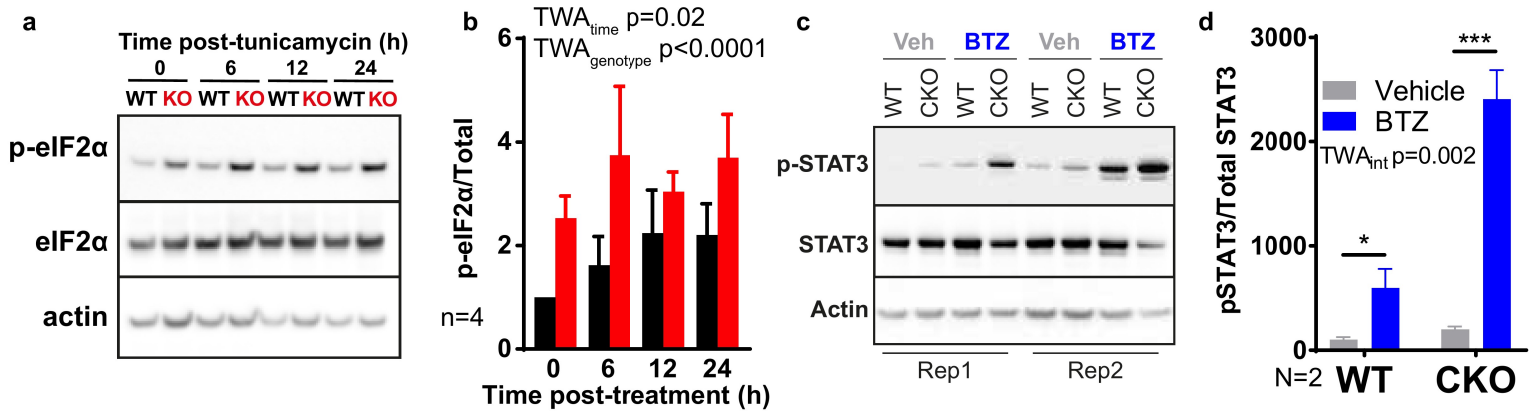

FIGURE 6

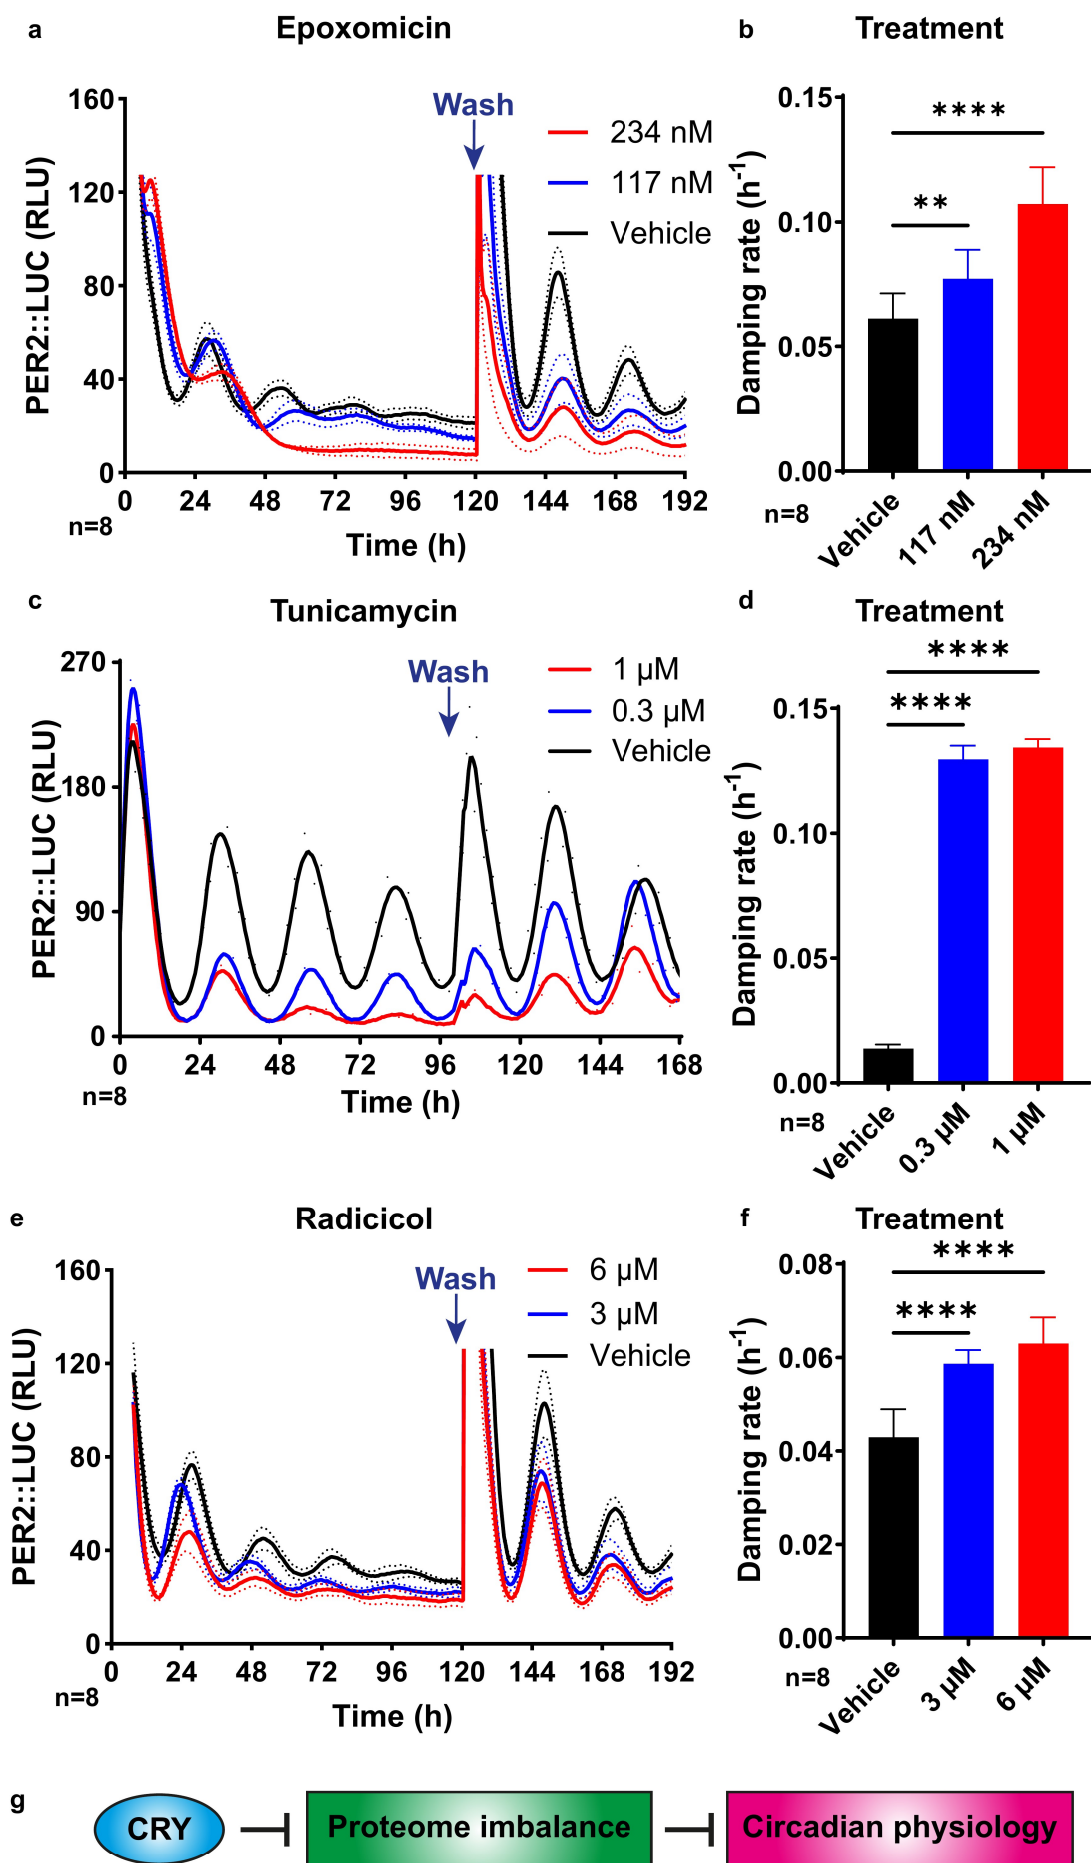

Source: http://biorxiv.org/content/10.1101/2020.05.16.099556v3.full.pdf
