13 **Abstract**

14 Circadian timekeeping in mammalian cells involves daily cycles of CRYPTOCHROME-dependent  
15 transcriptional feedback repression. Ablation of CRY in mice leads to reduced growth and numerous  
16 other phenotypes for reasons that are not well understood. Here, we find that cells adapt to CRY  
17 deficiency by extensive remodelling of the proteome, phosphoproteome and ionome, with twice the  
18 number of circadian-regulated proteins and phosphopeptides as well as increased rhythmic ion  
19 transport compared to wild-type cells. CRY-deficient cells also have increased protein synthesis and  
20 reduced proteasomal degradation, as well as an altered energetic state. These adaptations render cells  
21 more sensitive to stress, and may provide an explanation for the wide-ranging phenotypes of CRY-  
22 deficient mice. We suggest that daily rhythms in cellular protein abundance are damped by CRY-  
23 mediated repression to facilitate daily cycles of proteome renewal whilst maintaining protein  
24 homeostasis.

25

## 26 **Introduction**

27 From transcriptional activation and RNA processing, to protein synthesis, folding and degradation,  
28 multiple mechanisms operate at every stage of gene expression to ensure that each cellular protein is  
29 maintained in a concentration range appropriate for its biological function [1–3]. Proteome  
30 homeostasis is essential for cell viability and the correct temporal regulation of protein activity is  
31 critical to every biological process – too much or too little at the wrong time underlies most  
32 pathological states [4,5].

33

34 In mammals, cellular physiology is temporally orchestrated around daily cycles that regulate much  
35 of the proteome and most cellular functions to a circadian rhythm [6]. For example, global protein  
36 synthesis rates and ribosome biogenesis typically increase in anticipation of increased periods of  
37 animal activity (night-time in nocturnal mice, daytime in humans) [7,8]. Daily rhythms in proteome  
38 composition are observed *in vivo* and in cultured cells, under constant conditions, controlled by a  
39 cell-autonomous circadian clock [9,10]. In this way, circadian rhythms organise cell biology to  
40 anticipate and accommodate the predictable daily demands of day and night. Circadian dysregulation  
41 is strongly associated with pathological states [6], highlighting its importance for organismal health.  
42 Daily timekeeping is synchronised *in vivo* by systemic cues such as insulin and glucocorticoid  
43 signalling, which align internal cellular timing with environmental cycles [11]. On any given day, the  
44 circadian cycle is expressed by more cells of the human body than the cell division cycle, yet its  
45 mechanistic basis is poorly resolved [12].

46

47 Circadian rhythms in tissues and cultured cells are usually accompanied by daily oscillations in the  
48 abundance of many mRNAs [13]. These oscillations are mediated by daily cycles of transcriptional  
49 feedback repression of a core clock genetic circuit comprising the *Period1/2* and *Cryptochrome1/2*  
50 genes, and fine-tuned by various auxiliary but non-essential transcriptional feedback mechanisms  
51 [13,14]. Within this model, the transcription of *Period* and *Cryptochrome* genes is stimulated by a

52 complex containing the activating transcription factors (BMAL1 and CLOCK or NPAS2). The  
53 stability, interactions and nucleocytoplasmic shuttling of the encoded PER and CRY proteins is  
54 regulated post-translationally until, many hours later, they repress the activity of BMAL1-containing  
55 complexes. This transcriptional-translational feedback loop (TTFL) is proposed as the basis of  
56 circadian timekeeping in mammalian cells [15]. Genes whose transcription are regulated by core  
57 TTFL factors are thought to drive circadian rhythms in the encoded proteins to control myriad cellular  
58 functions [13,14].

59  
60 Within the TTFL model of circadian rhythm generation, CRY proteins are the essential repressors of  
61 CLOCK/BMAL1 activity [16,17], and have long been considered indispensable for circadian  
62 rhythms *in vivo* and cells *ex vivo* [18–22]. In contrast, PER proteins play critical signalling and  
63 scaffolding roles, required for the nuclear import and targeting of CRY to BMAL1-containing  
64 complexes [17]. Recently however, we found that CRY-deficient cells, tissues and mice retain the  
65 capacity for circadian timing, in the absence of canonical TTFL function [23]. Similarly, circadian  
66 oscillations were retained in cells and tissue slices lacking BMAL1 [24]. Whilst we cannot exclude  
67 the presence of some unknown transcriptional feedback-driven oscillation, many previous  
68 observations argue against this [12,17,19,21,22,25–28]. Recent evidence supports the hypothesis that  
69 a conserved post-translational cytosolic oscillator (PTO, or “cytoscillator”) may be responsible for  
70 generating the oscillation from which circadian transcriptional cycles derive [12,29,30]. Thus, while  
71 the TTFL is crucial for rhythmic robustness and co-ordinating outputs, it is not required for generation  
72 of rhythms.

73  
74 The complex phenotype of mice lacking CRY proteins has been interpreted to mean that circadian  
75 timekeeping is crucial for organismal physiology. The emerging observations that circadian rhythms  
76 are retained in CRY or BMAL1-deficient cells questions the basis of their respective knockout mouse  
77 phenotypes. We have therefore investigated the molecular consequences of CRY deficiency in cells

78 using an unbiased whole cell proteomic strategy. Our findings reveal a crucial role for CRY in the  
79 maintenance of protein homeostasis and suggest that the chronic stress-like state of CRY-deficient  
80 cells underlies the complex and numerous consequences of CRY deletion in mouse tissues and *in*  
81 *vivo*.

## 82 **Results**

### 83 **Cell-autonomous rhythms in the proteome and phosphoproteome persist in the absence of CRY**

84 To test the proteomic and phosphoproteomic consequences of CRY deletion, we used confluent  
85 primary mouse fibroblasts, a classic model of cellular circadian timekeeping where contact inhibition  
86 prevents any interference from the cell division cycle [9]. Wild-type (WT) and CRY1<sup>-/-</sup>; CRY2<sup>-/-</sup>  
87 (CKO) mouse fibroblasts in cell culture were synchronised using daily temperature cycles and  
88 sampled under constant conditions (Figure 1A). Quantitative proteomics detected over 6000 proteins  
89 and around 4000 phosphopeptides in both cell types. As expected [19,21,31] CRY1 was selectively  
90 detected in WT cells and displayed a rhythmic abundance profile with delayed phase relative to a  
91 PER2 luciferase reporter (PER2::LUC) recorded from parallel replicate cultures (Figure S1A).  
92 Examples of rhythmic and arrhythmic proteins and phosphopeptides are shown in Figure S1B/C.  
93 Based on estimates of intrinsic noise of gene expression [32–36], we chose a threshold of 10% relative  
94 amplitude to define biological significance. However, there was no relative amplitude threshold  
95 chosen for rhythmic phosphopeptides due to the lack of similar studies.

96

97 In WT cells, 7% of detected proteins and 8% of detected phosphopeptides showed significant  
98 circadian abundance rhythms. Unexpectedly, 17% of detected proteins and 14% of phosphopeptides  
99 in CKO cells were rhythmically abundant (Figure 1B-E). There was a modest but significant  
100 difference in the median relative amplitude of protein rhythms in CKO cells compared with WT  
101 (Figure S1D). Amongst the minority of proteins that were rhythmically abundant in both genotypes  
102 (Figure 1C), there was a strong positive correlation between their relative amplitudes (Figure S1E),  
103 which were overall higher in CKO cells compared with WT (Figure 2A).

104

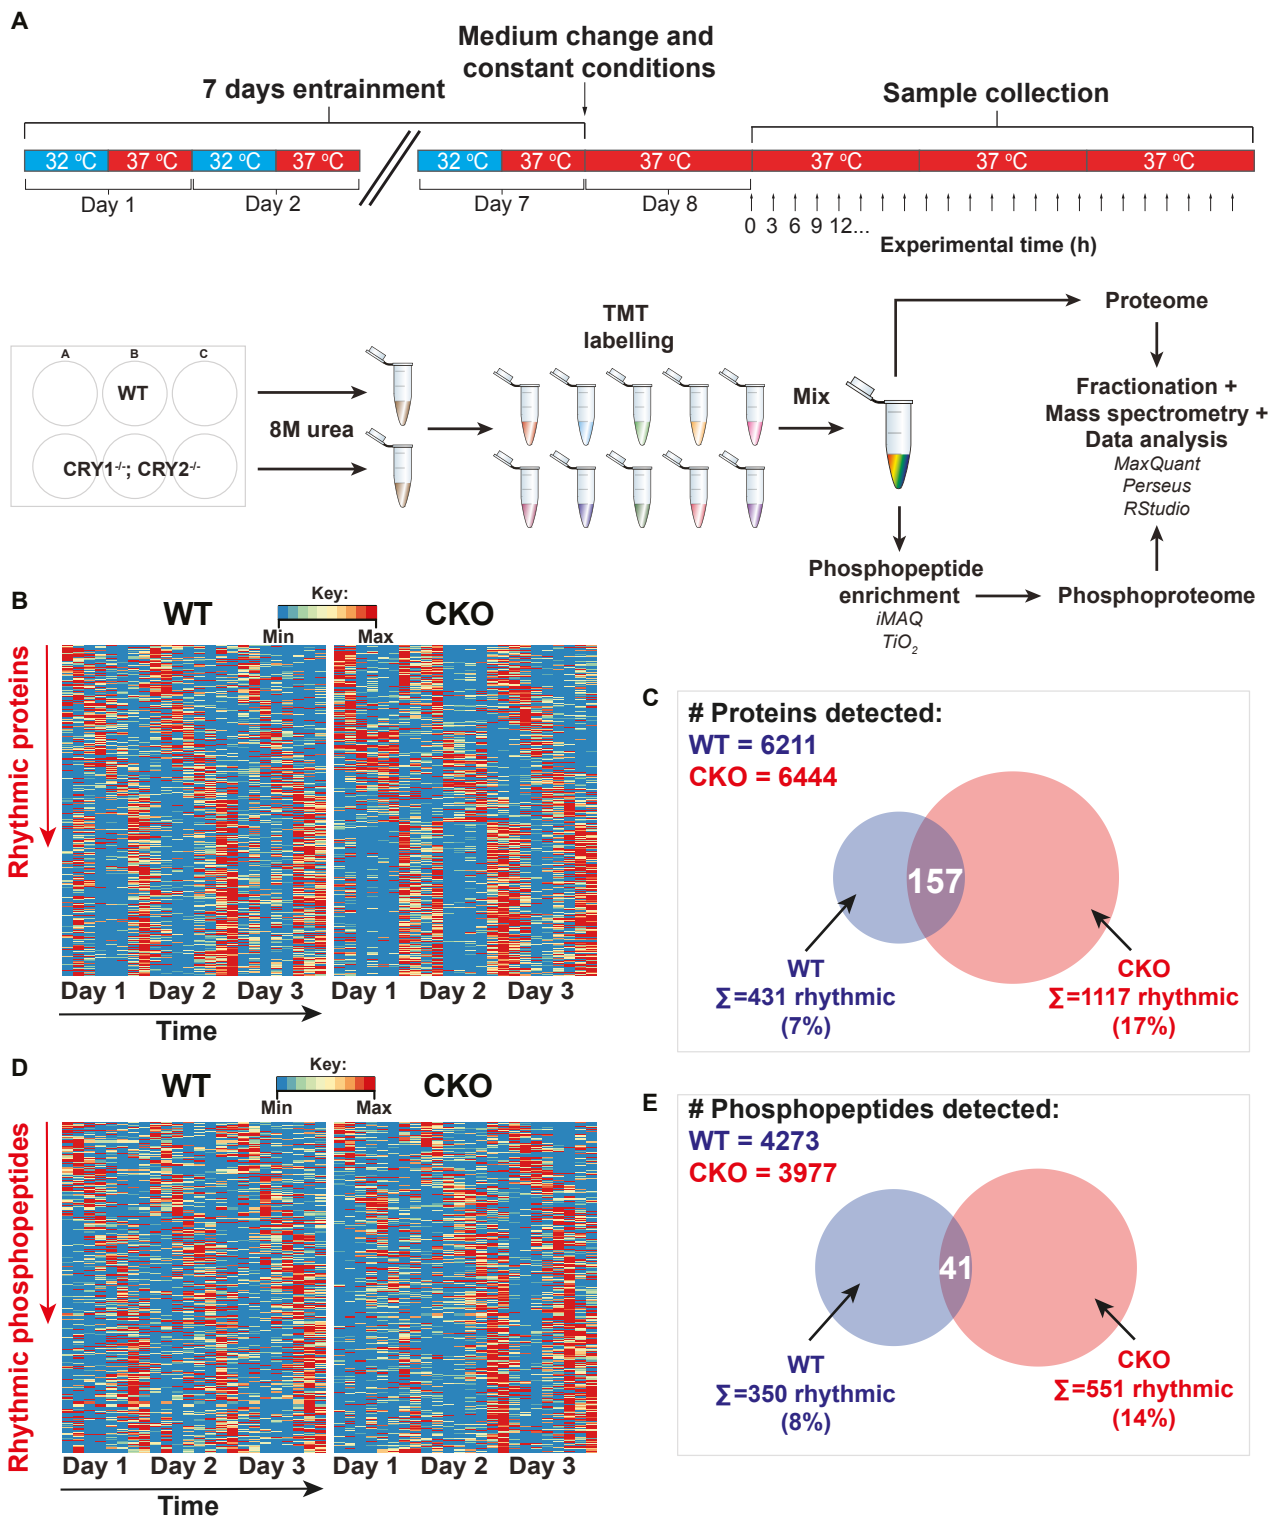

105

106 **Figure 1: Cell-autonomous rhythms in the proteome and phosphoproteome persist in the**  
 107 **absence of CRY. A)** An overview of the proteomics experimental workflow. Samples were taken  
 108 every 3 hours for 3 days in constant conditions, starting 24 h after medium change (“Experimental  
 109 time 0 h”). **B)** Heatmaps showing min-max normalized plots for all the rhythmic proteins in WT (left)  
 110 and CKO (right). For each genotype separately, rows represent proteins (sorted by phase), and each

111 column is a time point from the timecourse experiment. **C)** Venn diagram showing the numbers of  
112 rhythmic proteins in WT cells and CKO cells with relative amplitude  $\geq 10\%$ , with the overlap  
113 annotated. **D)** Heatmaps showing min-max normalized plots for all the rhythmic phosphopeptides in  
114 WT (left) and CKO (right). For each genotype separately, rows represent phosphopeptides (sorted by  
115 phase), and each column is a time point from the time-course experiment. **E)** Venn diagram showing  
116 the numbers of rhythmic phosphopeptides in WT cells and CKO cells, with the overlap annotated.

117

118 As with proteins, we found that CKO rhythmic phosphopeptides were significantly increased in  
119 relative amplitude and abundance compared with WT (Figure 2B). To gain more insight into the  
120 mechanism driving these phosphorylation rhythms we used the PHOSIDA database [37,38] to infer  
121 kinase activity using the rhythmic phosphopeptide sequences. Kinases typically associated with  
122 circadian period determination were not over-represented in WT or CKO rhythmic datasets compared  
123 to background however, nor in the set of phosphopeptides that were rhythmic in both genotypes  
124 (Figure S2 A-C).

125

126 The phase distribution of rhythmic proteins in both genotypes was clustered at experimental time 0 h  
127 (Figure 2C), when PER2::LUC activity in wild type cells was maximal (Figure S1A). This phase  
128 clustering was also true for proteins that were only rhythmic in CKO cells (Figure 2D), and for most  
129 proteins that were only rhythmic in WT cells (Figure 2E). A subset of proteins that were rhythmic in  
130 WT only, including CRY1, were clustered around experimental time 12 h (Figure 2E). This cluster  
131 was not present in proteins that were rhythmic in CKO only (Figure 2F). In WT cells, we observed  
132 clustering of protein phosphorylation to an earlier phase compared to rhythmically abundant proteins  
133 and PER2::LUC (Figure 2G). In comparison, there was a broader distribution of phase among  
134 rhythmic phosphopeptides in CKO cells (Figure 2H).

135



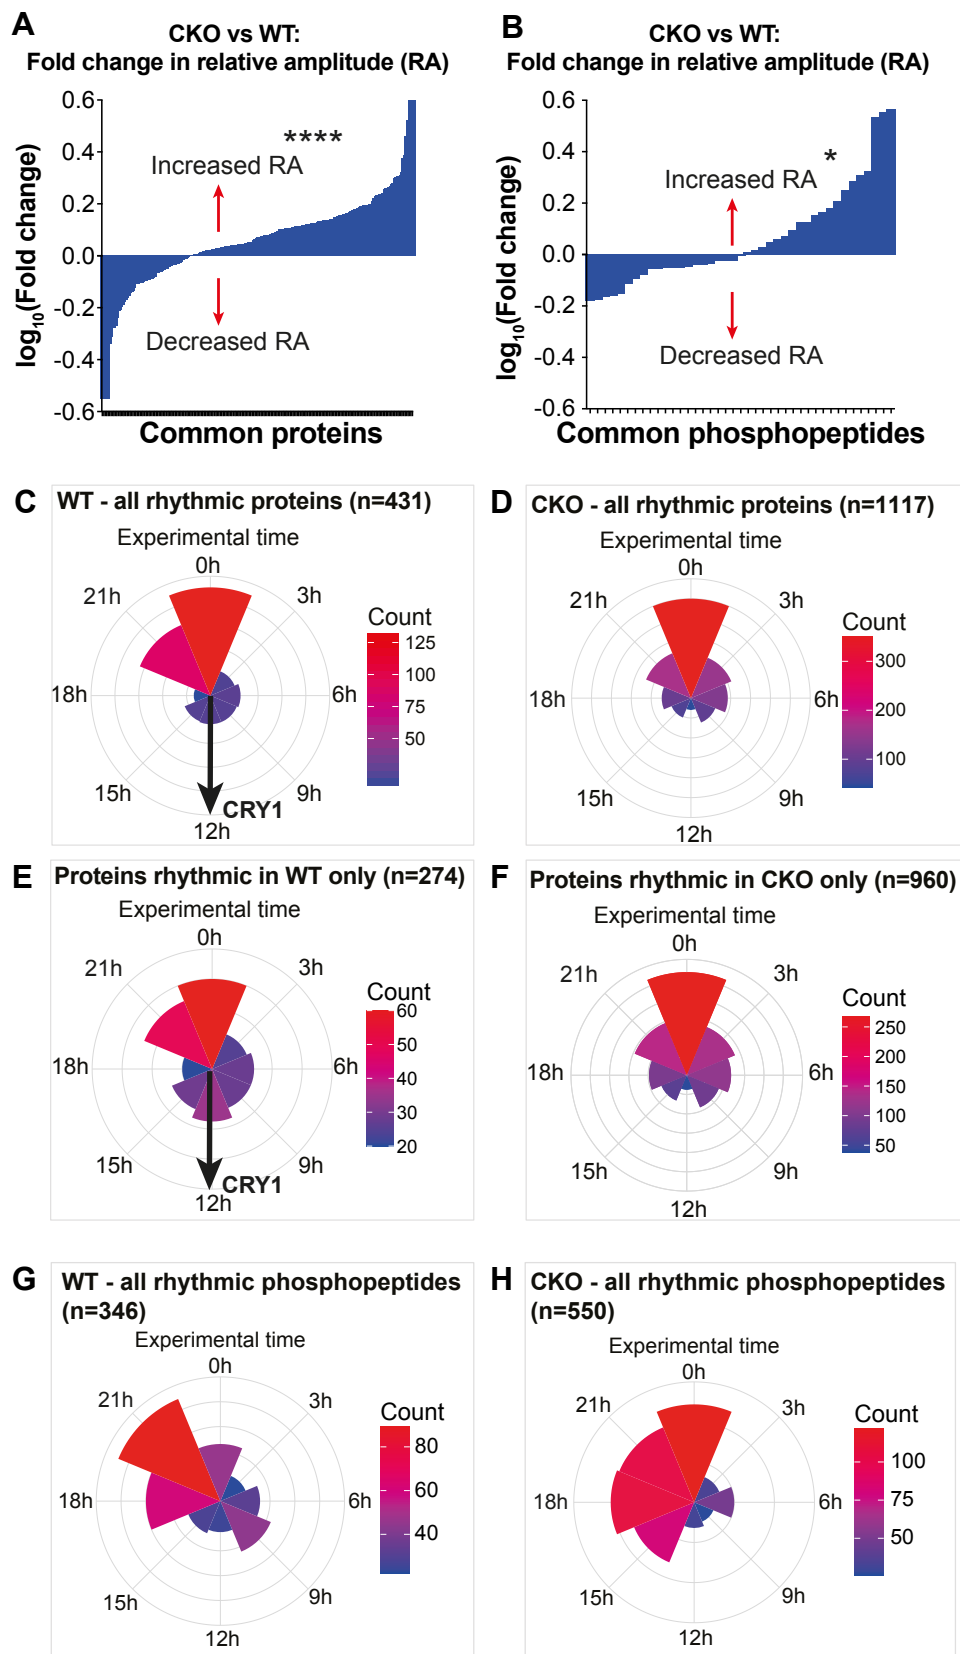

136

137 **Figure 2: CRY regulates relative amplitude and phase of the rhythmic proteome and**  
138 **phosphoproteome. A) Fold-change in relative amplitude (RA) was calculated for each of the proteins**  
139 **found to be rhythmic in both genotypes by RAIN analysis (i.e. no RA cut-off). The mean fold change**

140 (log) in RA was an increase of 14% in CKO cells compared to WT cells (One sample t-test,  $p < 0.0001$ ).

141 **B)** Fold-change in relative amplitude (RA) was calculated for each of the phosphopeptides found to  
142 be rhythmic in both genotypes by RAIN. On average, the RA was increased in CKO cells compared  
143 to WT cells by 6% (One sample t-test,  $p < 0.05$ ). **C, D)** Circular histograms showing the number of  
144 proteins at each rhythmic phase. Phase is defined and estimated by RAIN, as the time of the first  
145 predicted peak in a 24-hour period. Concentric circles represent the counts scale, with the outermost  
146 circle marking the upper end of the counts. The distributions of rhythmic proteins in CKO cells was  
147 significantly different to WT cells (left,  $p < 0.001$ , Watson's two-sample test). **E), F)** This was also  
148 the case for the proteins rhythmic in only one genotype (right,  $p < 0.001$ , Watson's two-sample test).

149 **G, H)** Circular histograms showing the number of phosphopeptides at each rhythmic phase. The  
150 distributions of rhythmic phosphopeptides in CKO cells was significantly different to WT cells  
151 ( $p < 0.001$ , Watson's two-sample test).

152

153 These observations demonstrate that cell-autonomous rhythmicity of protein abundance and  
154 phosphorylation occurs independently of CRY, and hence the canonical TTFL. Instead, the primary  
155 role of CRY appears to be two-fold. First, CRY suppresses the amplitude of protein and  
156 phosphopeptide abundance rhythms. The greater amplitude in the absence of CRY reveals more than  
157 twice the number of rhythmic proteins detected in WT cells. Second, CRY regulates the phase of  
158 rhythmicity for a sub-population of proteins and phosphopeptides.

## 159

### 160 **CRY suppresses the cell-autonomous rhythmic proteome and phosphoproteome**

161 To gain insight into which aspects of cell physiology are most impacted by CRY deletion, we  
162 searched for patterns and commonalities among the set of dysregulated proteins. Although it has been  
163 suggested that proteins with shorter half-life have been correlated with circadian regulation [39], our  
164 analysis showed little or no obvious relationship in either WT or CKO cells. If anything, rhythmic  
165 proteins had longer half-lives than non-rhythmic proteins (Figure S3A, B). In contrast, rhythmic

166 proteins showed significantly higher average expression than non-rhythmic proteins (Figure 3A, B)  
167 as previously suggested [40,41]. This relationship was true for both genotypes, but stronger in CKO  
168 cells. Although part of this correlation may be due to preferential and more accurate detection of  
169 oscillating high abundance proteins, this explanation cannot account for the different relationships in  
170 WT and CKO cells (Figure 3C). We found similar relationships in the phosphoproteome (Figure 3D).  
171 Thus, the TTFL-independent circadian rhythm seen in CKO acts preferentially towards more  
172 abundant proteins and phosphopeptides.

173

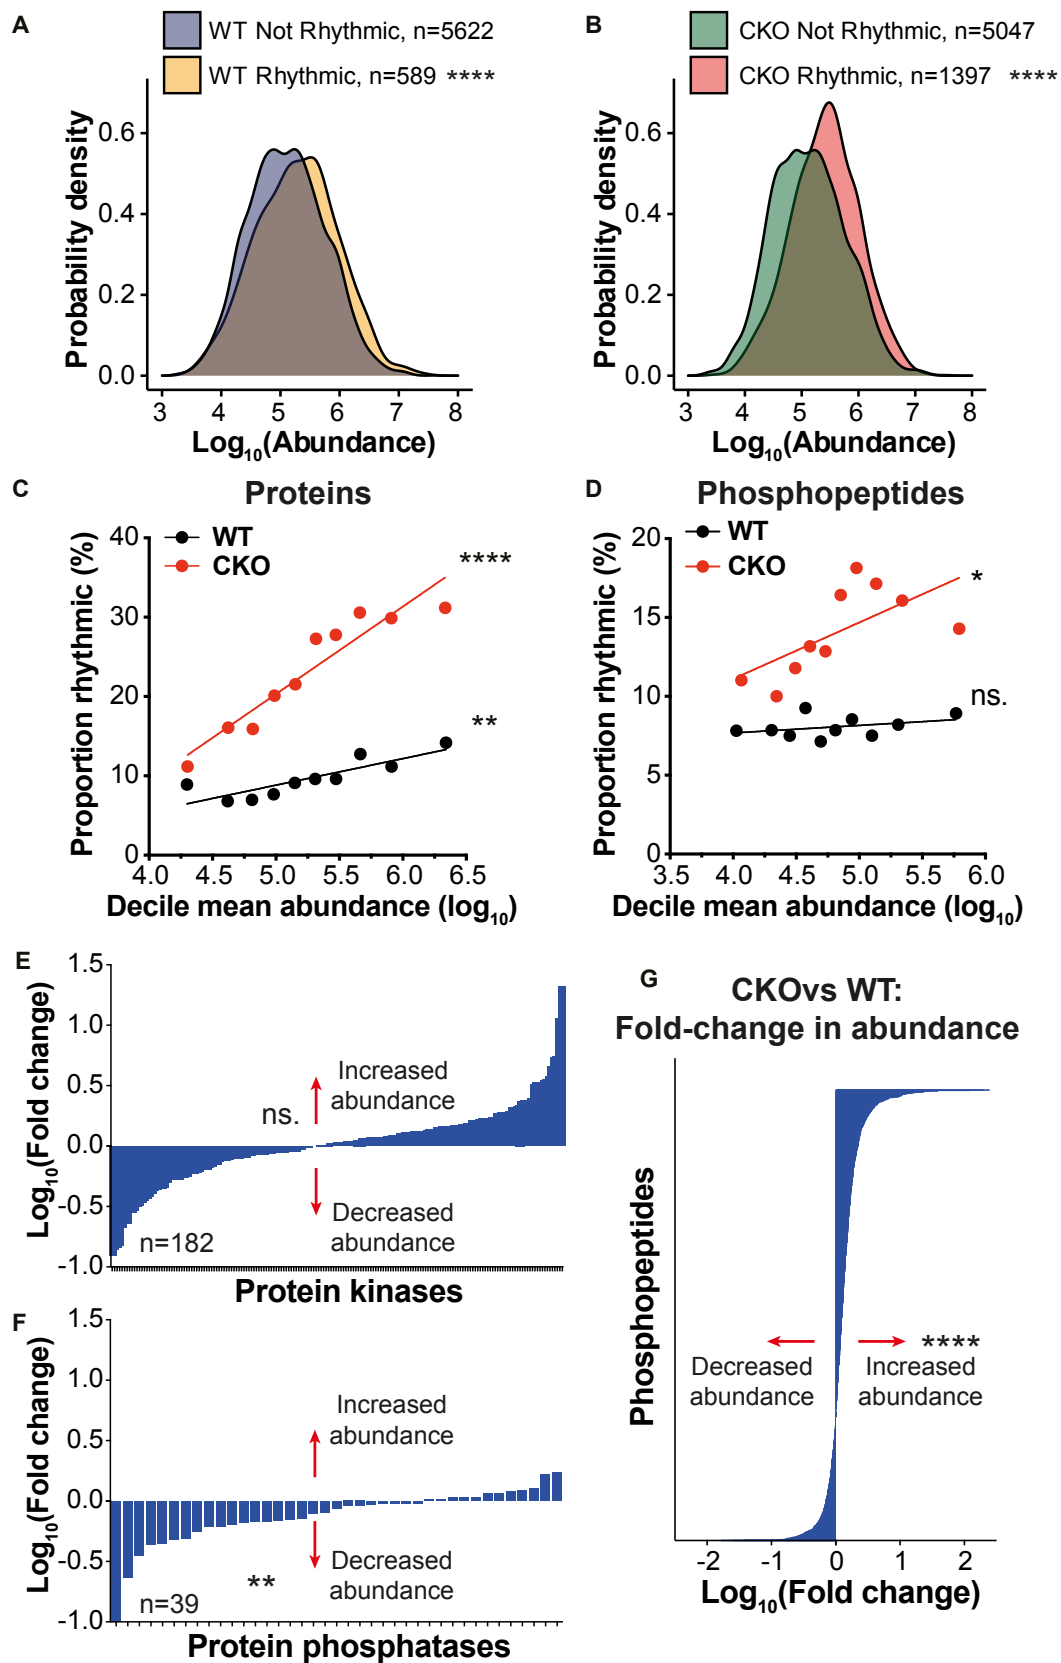

174

175 **Figure 3. CRY suppresses the cell-autonomous rhythmic proteome and phosphoproteome. A),**

176 **B) Probability density graphs compare the distribution of protein abundances. In both genotypes,**

177 **rhythmic proteins were more abundant than non-rhythmic (WT  $p < 0.0001$ , CKO  $p < 0.0001$ , t-test with**

178 log-transformed data). **C)** For each genotype, all proteins were divided into 10 deciles of equal  
179 number, ranked by abundance. The mean abundance of each decile was plotted against the proportion  
180 of the decile that was rhythmic. Linear regression lines are shown for each genotype, and the slopes  
181 were significantly non-zero (F test, WT  $p=0.0016$ , CKO  $p<0.0001$ ). The slopes were also  
182 significantly different to each other (F test,  $p=0.0001$ ). **D)** The same analysis in C) was carried out  
183 for phosphopeptides. The slopes was significantly non-zero in CKO but not WT (F test, WT  $p=0.3$ ,  
184 CKO  $p=0.04$ ). The slopes were also significantly different to each other (F test,  $p<0.0001$ ). **E), F)**  
185 Fold-change in abundance was calculated for protein kinases (E) and protein phosphatases (F)  
186 detected in the proteomics dataset. There was a significant downregulation of phosphatase abundance  
187 in CKO cells compared to WT (One sample t test,  $p=0.002$ ,  $n=39$ ), but no overall change in kinase  
188 abundance (One sample t test,  $p=0.7$ ,  $n=182$ ). **G)** Fold-change in abundance was calculated for each  
189 phosphopeptide. There was a significant upregulation of phosphorylation in CKO cells compared to  
190 WT (One sample t test,  $p<0.0001$ ,  $n=2803$ ).

191  
192 Overall, we observed that a remarkable 82% of the detected proteome in CKO cells were altered in  
193 abundance (Figure S3C, Abundance up + down), suggesting that global protein synthesis and  
194 degradation rates may be dysregulated. We therefore asked whether CRY deletion might unmask  
195 rhythmicity in proteins that normally exhibit similar rhythms of synthesis and degradation, thus  
196 appearing arrhythmic in WT cells. In our dataset there was a significant association between changes  
197 in abundance and changes in rhythmicity (Figure S3C). Our observations indicate that the cell-  
198 autonomous circadian clock regulates around 29% of the proteome (Figure S3C, green + blue +  
199 brown), with the TTFL primarily acting to suppress rhythms in the abundance of most of these  
200 proteins (Figure S3C, green). Similarly, we asked whether CRY deletion may impact upon the  
201 abundance of protein kinases and phosphatases, which act in dynamic equilibrium to determine the  
202 phosphorylation level of each phosphopeptide. In our proteomics dataset, there was no significant  
203 overall change in abundance of protein kinases (Figure 3E), but there was an overall decrease in

204 abundance of protein phosphatases (Figure 3F). Consistent with this, in our phosphoproteomics  
205 dataset we saw that overall there was an increase in phosphorylation (Figure 3G). We also found a  
206 strong link between changes in abundance and rhythmicity of phosphopeptides between the two  
207 genotypes (Figure S3D). This suggests that CRY represses global protein phosphorylation as well as  
208 rhythms in phosphorylation.

209

210 Bringing all these observations together, we suggest that CRY deletion may uncouple the synthesis  
211 and degradation of many proteins as well as the phosphorylation and dephosphorylation of many  
212 phosphosites. These two factors reveal more than twice the number of rhythmic proteins and  
213 phosphopeptides detected in WT cells, and results in a significant change in steady-state abundance  
214 of most of the proteome and phosphoproteome.

215

## 216 **CRYPTOCHROME regulates proteasome activity and translation rate**

217 We explored potential mechanisms for these widespread proteome changes by searching our dataset  
218 for key factors regulating protein synthesis and degradation. STAT3 and DDI2 are key regulators of  
219 proteasome abundance and activity [42]. We found their average expression levels were reduced in  
220 CKO cells (Figure 4A), accompanied by a striking reduction in the abundance of catalytic  
221 proteasomal subunits (Figure 4B, S4A) which we validated by western blot and enzymatic assays of  
222 proteasome activity (Figure 4C, S4B-C).

223

224 We also observed a significant increase in cytosolic protein synthesis rate by <sup>35</sup>S-methionine  
225 incorporation (Figure 4D, S4D-E). We considered that the combined effect of reduced proteasomal  
226 activity and increased translation rate would affect the overall steady state levels of cellular protein.

227 We found this to be the case, with significantly higher overall protein per CKO cell compared with  
228 WT (Figure 4E).

229

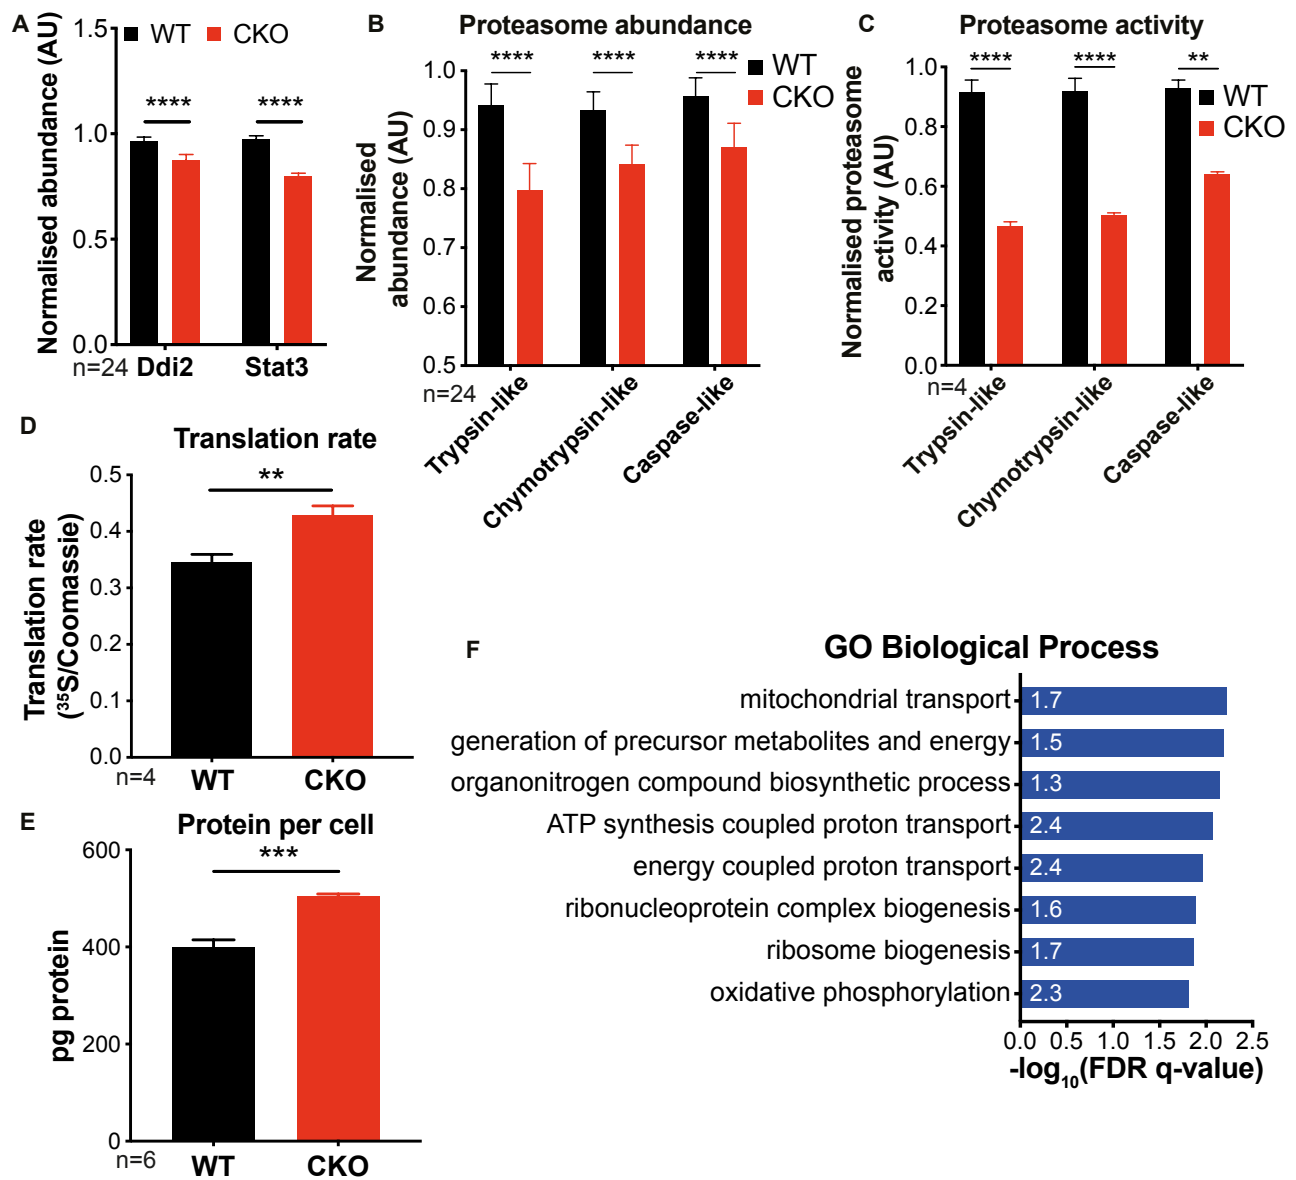

230

231 **Figure 4. CRYPTOCHROME regulates proteasome activity and translation rate.** A) The  
 232 average abundance of proteins encoded by *Ddi2* and *Stat3* was calculated and max normalised for  
 233 presentation. The average was calculated from all 24 time points of the proteomics experiment. Both  
 234 proteins were down-regulated in CKO cells Mean±SD, multiple t tests with Holm-Sidak correction.  
 235 **B)** The average abundance of catalytic proteasome subunits was calculated and max normalised for  
 236 presentation. Trypsin-like ( $\beta 2$ ), chymotrypsin-like ( $\beta 3$ ) and caspase-like ( $\beta 1$ ) subunits are shown.  
 237 The average was calculated from all 24 time points of the proteomics experiment. Mean±SD, 2-way  
 238 ANOVA with Sidak's multiple comparisons. **C)** Proteasome activity measured using the  
 239 ProteasomeGlo Assay (Promega). Mean±SEM, 2-way ANOVA with Sidak's multiple comparisons.  
 240 **N=6. D)** Translation rate was measured using <sup>35</sup>S-methionine labelling and imaging with phosphor

241 screens (images shown in Figure S4). The quantification values were normalised to the total protein  
242 concentration as measured using Coomassie stain. Mean±SEM, Student's t test with Welch correction.  
243 N=3. **E)** Total protein mass per cell in confluent WT and CKO cultures. Cells were grown in two 12-  
244 well plates; one was used for cell counting and the other was used for lysis in RIPA buffer prior to  
245 protein quantification by BCA assay. Mean±SEM, Student's t test with Welch correction. **F)** The top  
246 results by FDR q-value, of ranked gene ontology analysis with all proteins ranked by decreasing fold  
247 change in abundance between CKO and WT cells. Fold-enrichment is annotated on each bar.

248

249 mRNA translation is one of the most energetically demanding of cellular processes, consuming up to  
250 75% of the cellular ATP [1,43,44]. CKO cells showed increased abundance of proteins associated  
251 with ribosome biogenesis and energy generation which included many subunits of glycolytic and  
252 mitochondrial electron transport chain complexes as well as the F<sub>0</sub>/F<sub>1</sub>-ATP synthase (Figure 4F, S4F-  
253 H). Increased expression of proteins related to energy production may reflect an adaptation of CKO  
254 cells to accommodate the increased energetic demands of protein synthesis. Therefore cultured CKO  
255 cells have more protein, increased translation and decreased proteasomal degradation than WT cells,  
256 as well as an altered energetic state. Altogether, our data suggest that CKO cells likely maintain a  
257 different set point for protein homeostasis, as occurs in many pathological states [4,5].

258

### 259 **Rhythmic regulation of ion transport and protein content is TTF1-independent and amplified** 260 **by CRY deletion**

261 We explored cellular processes that may be rhythmically regulated in CKO cells using gene ontology  
262 (GO) analysis. Of the rhythmically abundant proteins, ranked GO analysis revealed a consistent  
263 enrichment for processes associated with ion transport, both in wild type and CKO cells when  
264 analysed separately or combined (Figure 5A-C). In our proteomics dataset we also found altered  
265 expression levels and increased relative amplitudes of many ion transporters in CKO compared with



266 WT cells (Figure 5D-E). This included several members of the SLC12A family of electroneutral  
 267 transporters (Figure 5F).

268

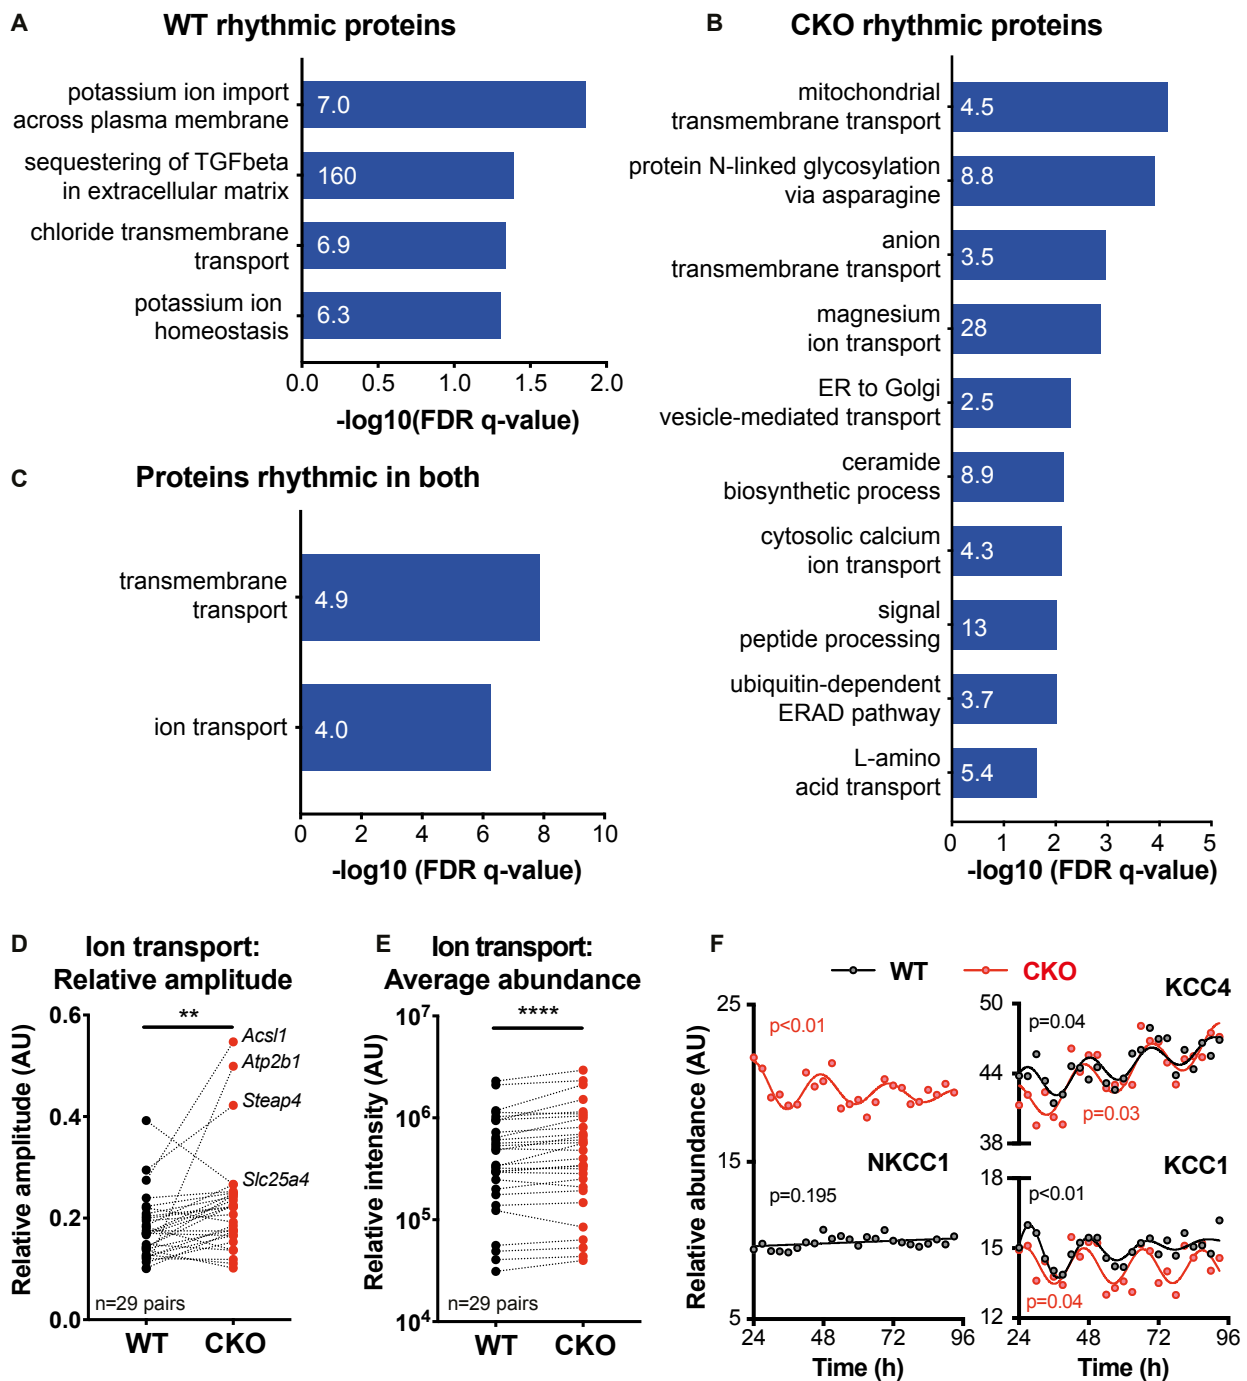

269

270 **Figure 5. Rhythmic regulation of ion transport in WT and CKO cells.** A) Gene ontology analysis  
 271 for rhythmic proteins was carried out using Gene ontology enrichment analysis and visualisation  
 272 (GOrilla) [45,46]. Significantly rhythmic WT proteins were compared against background (all  
 273 proteins identified in the experiment), and the top non-overlapping GO Biological Process terms

274 shown, sorted according to FDR q-value. Fold enrichment is annotated on each bar. The same GO  
275 analysis was carried out comparing proteins rhythmic in both genotypes to the background **(B)** as  
276 well as all proteins that were rhythmic in CKO cells **(C)**. **(D), E)** 29 proteins were annotated as “Ion  
277 transport” by the GO analysis from the proteomics experiment – relative amplitude and average  
278 abundance was calculated for each of these proteins, in both WT and CKO. On average, both relative  
279 amplitude and average abundance was increased in CKO cells compared to WT (Paired t test). **(F)**  
280 Examples of key ion transporters are shown, as detected in the proteomics experiment. P values show  
281 the results of an F test comparing fits of damped cosine against straight line. All proteins except WT  
282 NKCC1 had RAIN p-values <0.05.

283

284 To validate these findings, we measured the ion content of cells across the circadian cycle. Consistent  
285 with previous investigations (Stangherlin *et al.*, submitted), in WT cells, K<sup>+</sup> and digitonin-extracted  
286 cytosolic protein concentrations exhibited anti-phasic circadian rhythms (Figure 6A), with no  
287 significant daily variation in total cellular protein. The same was observed in CKO cells (Figure 6B),  
288 but with higher relative amplitude (Figure 6C, D), and without observable rhythms in  
289 bioluminescence of the clock protein reporter, PER2::LUC (Figure 6A,B, bottom panel). In light of  
290 the enrichment we observed among CKO but not WT rhythmic proteins for Mg<sup>2+</sup> and Ca<sup>2+</sup> transport  
291 (Figure 5B), we also found it pertinent that these ions showed significant circadian variation in CKO,  
292 but not WT cells, whereas Mn<sup>2+</sup> was rhythmic in neither (Figure S5). To understand the contribution  
293 of colloidal and ionic solutes to cytoplasmic osmolarity in our experiment we calculated the  
294 protein:ion ratio at each timepoint. We used K<sup>+</sup> levels as a proxy for ion content because it is the most  
295 abundant intracellular osmolyte. Protein:ion ratio was rhythmic, with CKO cells showing a higher  
296 average protein:ion ratio as well as a greater relative amplitude (Figure 6E-G). Considering our  
297 previous observations, the higher amplitude cytosolic protein rhythms in CKO cells likely drive the  
298 higher amplitude K<sup>+</sup> rhythms, because changing K<sup>+</sup> levels function through SLC12A transporter

299 activity to buffer cellular osmotic potential in response to changes in cytosolic macromolecular  
 300 content (Stangherlin *et al.*, submitted).  
 301

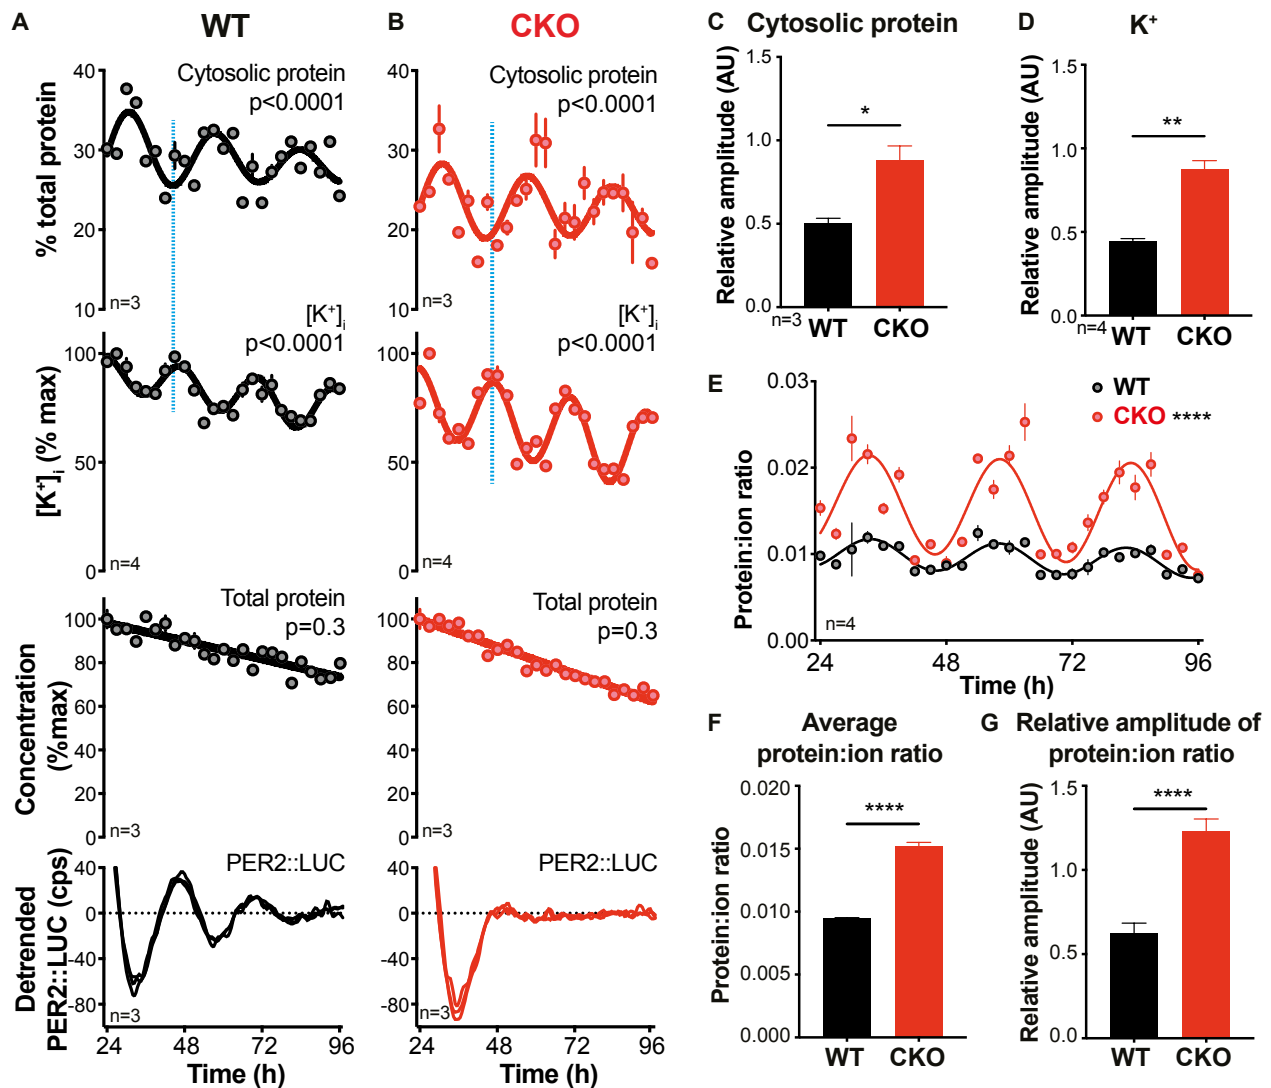

302  
 303 **Figure 6. CRY suppresses rhythms of ion transport and osmotic balance. A), B)** From one time-  
 304 course experiment, ions, cytosolic proteins and total protein were extracted in parallel samples. The  
 305 presented experiment is representative of 3 separate time-course experiments that were carried out  
 306 (N=3). Blue lines indicate the anti-phasic oscillations in cytosolic protein and potassium  
 307 concentration. Mean $\pm$ SEM, p-values from RAIN, red lines are fits by a damped cosine or a straight  
 308 line. Parallel PER2::LUC recordings were also performed and plotted as a phase marker. **C), D)**  
 309 Relative amplitudes of cytosolic protein and potassium concentrations oscillations in A) and B) were  
 310 greater in CKO compared to WT (Student's t test with Welch correction, mean $\pm$ SEM). **E)** Protein:ion

311 ratio was calculated from the cytosolic protein and potassium concentrations in A) and B). For each  
312 time point, the average cytosolic protein concentration was divided by the potassium concentration  
313 of each biological replicate. Mean±SD. P-values were calculated by RAIN and annotated using  
314 asterisks in the legend. **F), G)** Average protein:ion ratio and relative amplitude was greater in CKO  
315 compared to WT (Student's t test with Welch correction, mean±SEM).

316  
317 Our findings show that the rhythmic regulation of ion transport and cytosolic protein concentration  
318 may be of such fundamental importance to cell physiology that it is driven independently of CRY  
319 and therefore of canonical TTFL activity. Indeed, an important role of CRY may be to suppress daily  
320 changes in cytosolic macromolecular content and thus to efficiently maintain osmotic homeostasis.  
321 The loss of this function may be an important way in which protein homeostasis is altered in CKO  
322 cells compared to WT, since osmotic homeostasis is critical to cellular function and viability [47].

323

#### 324 **CRY-deficient cells are more sensitive to proteotoxic stress**

325 The viability of CKO cells suggests that they can maintain protein homeostasis overall, despite the  
326 altered set point of protein homeostasis. Using ranked GO analysis of overall protein fold-changes  
327 compared with WT, we found that the expression of proteins involved in “response to stress” was  
328 increased in CKO cells (Figure 7A, S6A), suggesting that the proteostasis network in CKO cells is in  
329 an activated state [48–50].

330

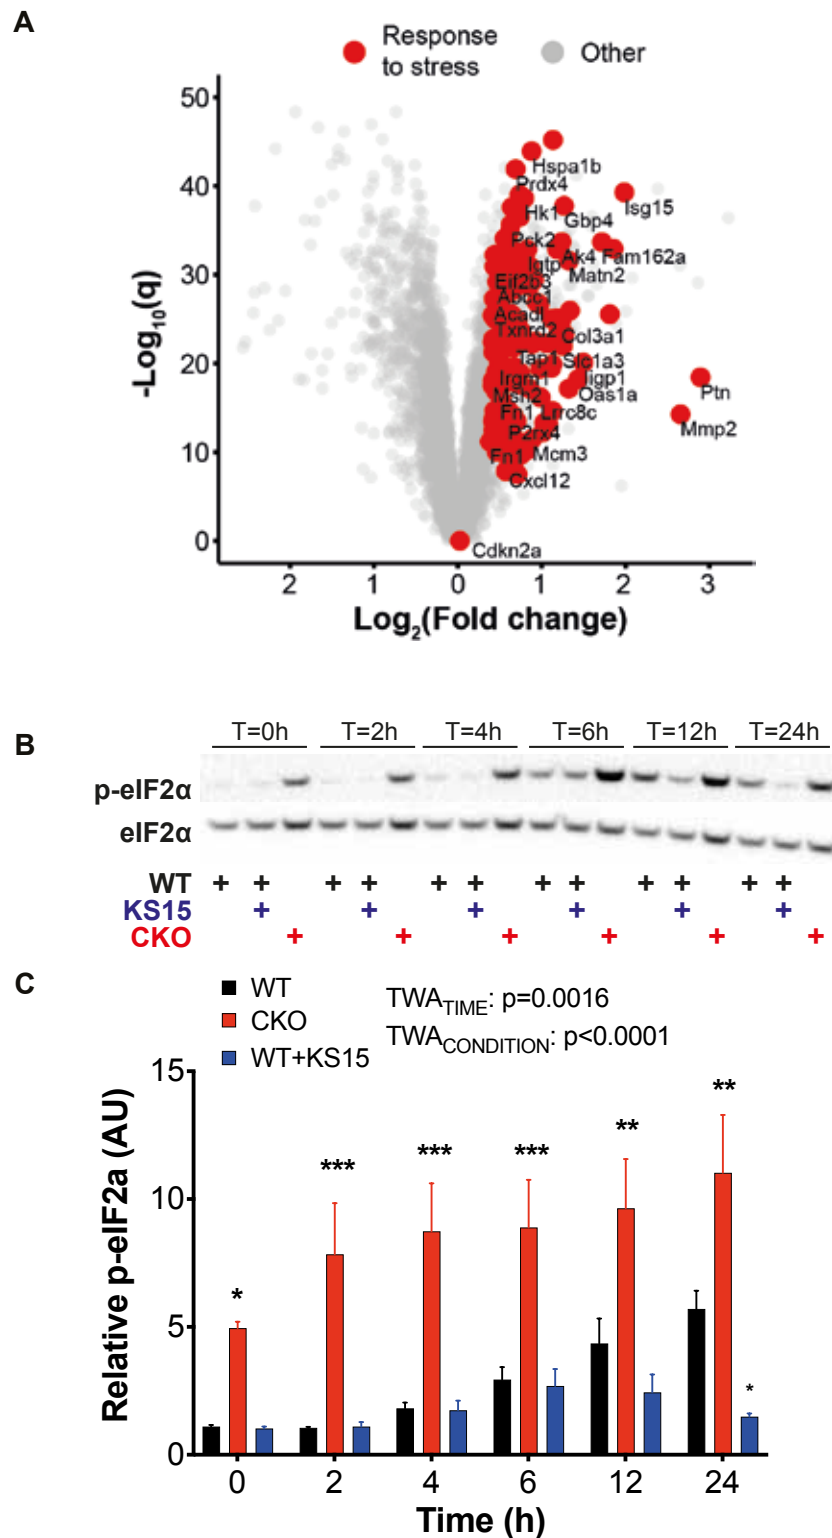

331

332 **Figure 7. Increased stress in CKO cells.** A) Volcano plot showing the fold change in average  
 333 expression of all proteins in CKO cells compared to WT ( $q$  = Benjamini-Hochberg corrected  $p$ -value).  
 334 Proteins annotated as “Response to stress” from GO analysis are highlighted in red, showing that  
 335 these are upregulated in CKO cells. B) Cells treated with 500 nM tunicamycin (TUN) were lysed in  
 336 RIPA buffer at time points from 2-24 hours. WT cells treated with 50  $\mu$ M KS15 (CRY inhibitor)

337 were used as a control (see text). A representative western blot is shown, with probes against  
338 phosphorylated (above) and total (below) eIF2 $\alpha$ . C) Quantification of the western blots in B),  
339 including all replicates. Mean $\pm$ SEM, n=4. 2-way ANOVA p-values are reported. Asterisks indicate  
340 results of Holm-Sidak's multiple comparisons test vs. WT for each timepoint. WT cells also showed  
341 a linear trend by 1-way ANOVA (p<0.0001).

342

343 We therefore hypothesised that CKO cells may be more susceptible to perturbations that would elicit  
344 a proteotoxic stress response. To test this, we probed WT and CKO cells for phosphorylation of eIF2 $\alpha$ ,  
345 a well-characterised marker of the integrated stress response (ISR). As a control we treated cells with  
346 tunicamycin, which induces the ISR *via* inhibition of secretory pathway protein glycosylation [51,52].  
347 We also treated cells with the CRY-inhibitor KS15 [53,54] to distinguish the acute effects of CRY  
348 inactivation from the long-term effects of its genetic deletion on cellular proteostasis. We found that  
349 CKO cells had higher basal levels of phosphorylated eIF2 $\alpha$  compared with wild type or KS15 treated  
350 cells, as well as a significantly increased eIF2 $\alpha$  phosphorylation following tunicamycin treatment  
351 (Figure 7B, C). Phosphorylation inactivates eIF2 $\alpha$  in most cases to suppress translation [48], but we  
352 observed a net increase in protein synthesis in CKO cells (Figure 4D, S4D-E). Therefore the overall  
353 increase in translation rate must be higher than the suppression mediated by eIF2 $\alpha$  phosphorylation.

354

355 From these observations we suggest that the altered set point of protein homeostasis in CKO renders  
356 them more susceptible to proteotoxic stress. Indeed, we found that even medium changes were  
357 sufficient to induce an increased stress response compared with WT cells (Figure S6B).

358

359

360

361

362

### 363 **Physiological consequences of CRY-deletion**

364 Given our observations we considered how the general change of protein homeostasis in CKO cells  
365 might impact more broadly upon cellular and organismal physiology. Protein synthesis comprises the  
366 most expensive portion of a cell's energy budget [1], and since we observed a net increased translation  
367 rate in CKO cells we hypothesised that they may display increased energy consumption. Consistent  
368 with this, we found that CKO cells had higher rates of glycolysis compared to WT cells (Figure 8A,  
369 B).

370

371 Moreover, we also found features of increased energy usage in CKO mice. Both male and female  
372 CKO mice displayed a reduced growth rate, despite increased food consumption (Figure 8C-E),  
373 rescued by a single copy of *Cry2* in *Cry1*<sup>-/-</sup>; *Cry2*<sup>+/-</sup> mice. This suggests that the increased energy  
374 usage of cells that lack CRY may be a general cellular defect that affects the physiology of the animal.

375

376 Taking this further, we considered that the increased energy usage and susceptibility to proteotoxic  
377 stress might lead to a general impairment of health in CKO mice. In a retrospective analysis of mouse  
378 husbandry records we found a >3-fold increase in the death rate of weaned CKO mice compared with  
379 isogenic WT controls, which was rescued in *Cry1*<sup>-/-</sup>; *Cry2*<sup>+/-</sup> mice (Figure 8F). Post-mortem and  
380 histopathology examinations were performed on 4 mice that underwent spontaneous death, and the  
381 most common finding was mild extramedullary haematopoiesis (EMH), a sign of systemic  
382 inflammation [55,56] (Table 1). This is consistent with previous observations of a pro-inflammatory  
383 state in CKO mice [57–60]. Taking into account all our observations, we suggest that the increased  
384 cellular energy usage coupled with impaired proteostasis may be a major contributor to the pleiotropic  
385 physiological defects in CKO mice.

386

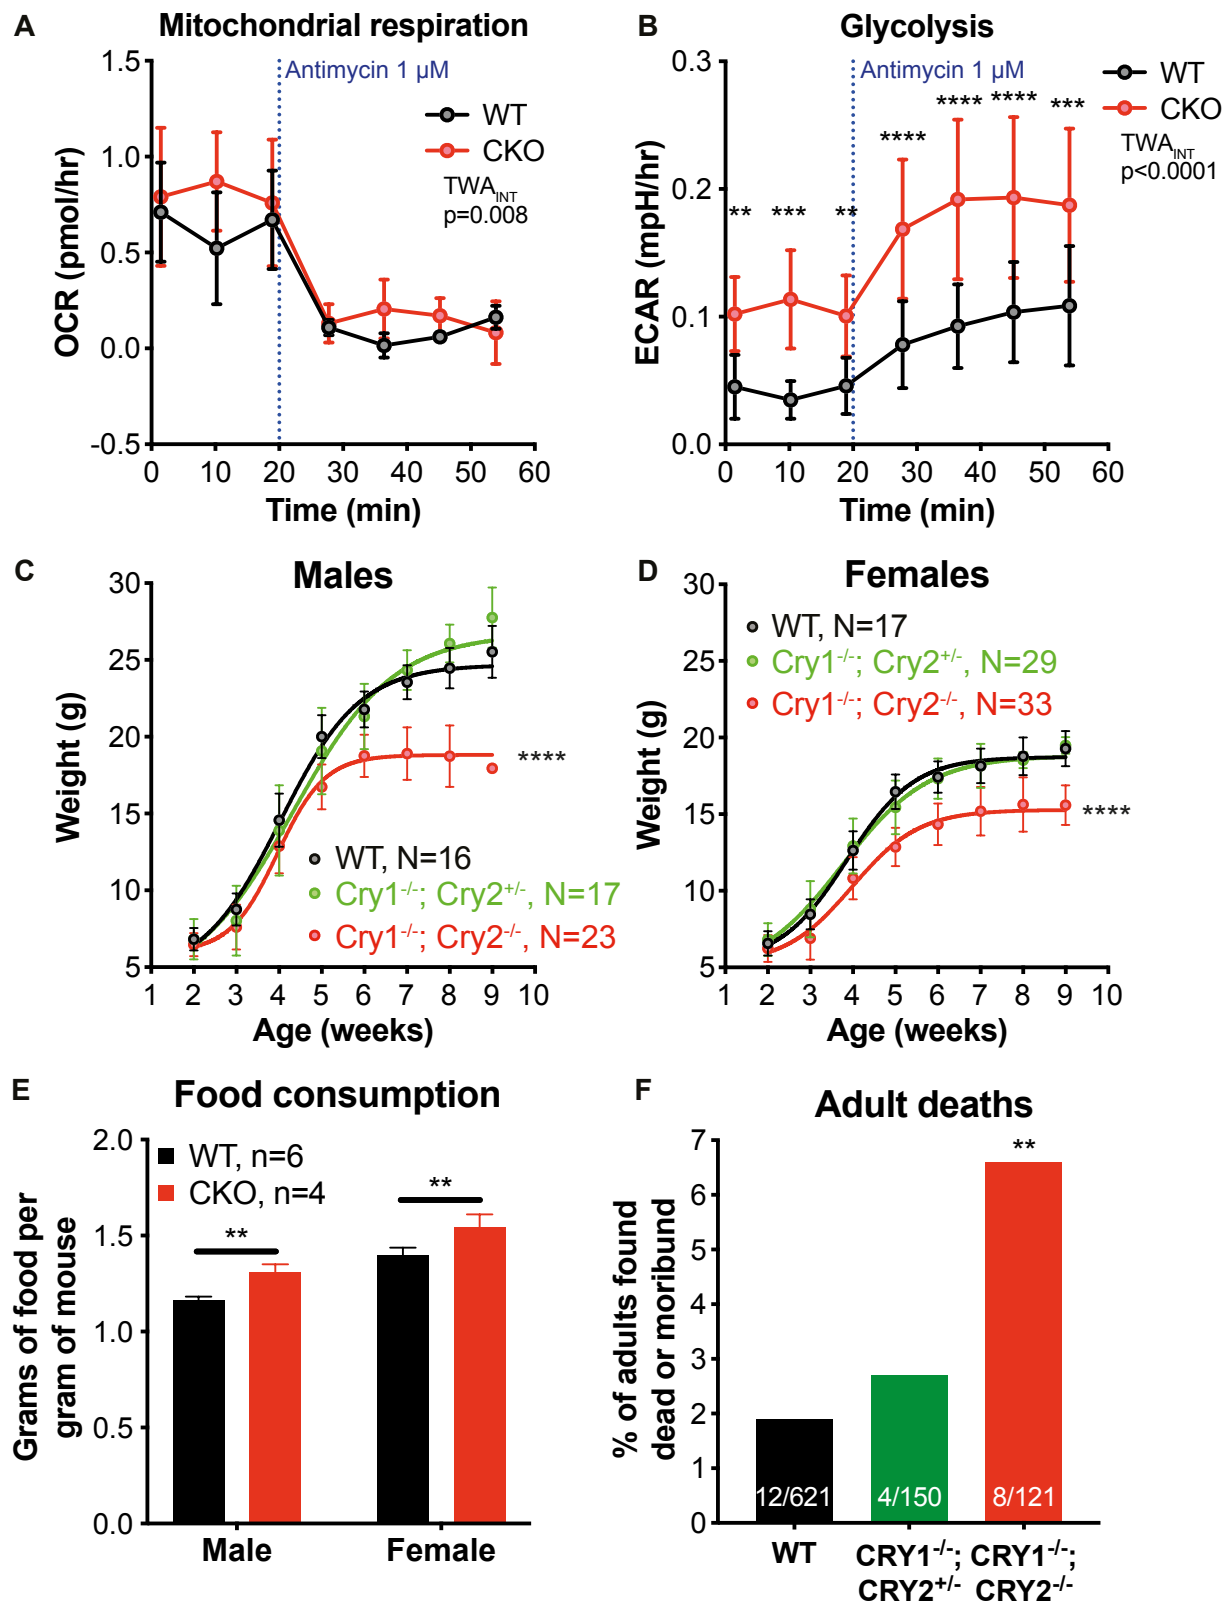

387

388 **Figure 8. Metabolic and pathological consequences of CRY deletion.** A), B) Seahorse assays were  
 389 performed with WT and CKO cells in culture to measure oxygen consumption rate (OCR, A), which  
 390 is a measure of mitochondrial respiration, as well as extracellular acidification rate (ECAR, B). The  
 391 vertical blue line indicates that after 20 minutes of measurement, antimycin was added to halt



392 mitochondrial respiration. Mean±SEM, 2-way ANOVA with Holm-Sidak multiple comparisons test  
393 denoted by asterisks, N=3. **C), D)** Growth curves of male and female mice were weighed weekly.  
394 Mice were of the following genotypes: WT, CRY1<sup>-/-</sup>; CRY2<sup>+/-</sup> and CRY1<sup>-/-</sup>; CRY2<sup>-/-</sup> (CKO). F test  
395 was used to test the null hypothesis that one curve fits all sets. P values annotated as asterisks. **E)**  
396 Food consumption measured over 1 week, normalised for mouse weight. Food consumption was  
397 monitored by weighing food daily. Mean±SD, 2-way ANOVA. **F)** Death rates among the 3 genotypes  
398 mentioned above, expressed as a percentage of the number of mice. The absolute numbers of deaths  
399 and total population size are annotated on the bars. Only mice that had been weaned were included,  
400 and unnatural causes of death (e.g. cage flooding, fighting) were excluded. Asterisk indicates  
401 significance from Chi-squared test for trend, p=0.007. Comparing WT and CKO, Fisher's exact test  
402 p=0.009. Comparing WT and Het, Fisher's exact test p=0.5.

403

| Mouse ID | Sex | Age at death (weeks) | Report findings                                           |
|----------|-----|----------------------|-----------------------------------------------------------|
| 1        | M   | 3                    | <b>EMH</b> , neutrophilic inflammation in lungs           |
| 2        | F   | 0.3                  | <b>EMH</b> , low liver glycogen, bilateral hydronephrosis |
| 3        | F   | 8                    | <b>EMH</b> , bilateral hydronephrosis                     |
| 4        | F   | 20                   | <b>EMH</b> , severe lower urinary tract inflammation      |

404

405 **Table 1: Histopathology of CRY-deficient mice.** 4 histopathological examinations were carried out  
406 on mice that were moribund and culled as a result. All mice were confirmed CRY1<sup>-/-</sup>; CRY2<sup>-/-</sup> by  
407 genotyping. Extra-medullary haematopoiesis (EMH) was found in all cases.

408

409 **Discussion**

410 We have shown that the absence of CRY does not abolish circadian organisation of the cellular  
411 proteome and phosphoproteome. Moreover, in CRY-deficient (CKO) cells we found a remarkable  
412 proteome dysregulation, leading to an altered set point of protein homeostasis that renders cells more  
413 susceptible to proteotoxic stress. This may be a general cellular feature that contributes to the  
414 pathophysiological state of CKO mice. These findings have significant implications for the role of  
415 the canonical TTFL and opens up several important avenues for future study.

416

417 There is accumulating evidence showing that the cell-intrinsic capacity to sustain ~24h rhythms does  
418 not require the canonical TTFL, and is generated post-translationally [12,24–28,61,62]. Instead the  
419 major contribution of CRY-mediated transcriptional-translational feedback to daily timing is to  
420 confer robustness upon the oscillation; indeed, CRY-deficiency simply appears to be epistatic to the  
421 daily organisation of behaviour and physiology *in vivo* under most conditions [23]. Our findings add  
422 to this growing body of literature, showing that circadian regulation at the proteome level persists in  
423 the absence of CRY-mediated feedback repression.

424

425 When analysing the effects of ablating clock genes, it is important to consider both altered rhythmicity  
426 of proteins and altered overall levels of proteins [63]. The abundance of any protein is a function of  
427 a dynamic equilibrium between synthesis and degradation. Global rates of protein synthesis are  
428 circadian regulated *in vitro* and *in vivo* [7,8,64–66], whereas total cellular protein levels are not  
429 (Figure 6; Stangherlin *et al.*, submitted) [23]. Therefore one or more pathways for protein degradation  
430 should normally be circadian regulated, for which some supporting evidence exists [67–69]. Since  
431 most rhythmically abundant mRNAs do not encode rhythmically abundant protein [10,24,70–74] this  
432 indicates that for most proteins, their relative rates of synthesis and degradation are either constant or  
433 have sufficiently similar rhythms that their concentrations do not change over 24h.

434

435 In our study, a key observation was that roughly twice as many proteins and phosphopeptides were  
436 rhythmic in CKO cells compared with WT, but only a small minority of rhythmic species were  
437 common to both genotypes. We also found that significant changes in the overall abundance of a  
438 given protein or phosphopeptide was associated with a change in rhythmicity. The parsimonious  
439 interpretation of our findings is that CRY normally functions to suppress rhythms in the abundance  
440 of a substantial proportion (19%) of cellular proteins by coupling rhythms of synthesis and  
441 degradation (Figure S3C). Removing CRY unmasks the rhythm for these proteins. In most cases  
442 (16%) this leads to a change in the abundance of that protein, due to the new equilibrium that results  
443 from a change in the average rate of protein synthesis relative to degradation. A smaller proportion  
444 of cellular proteins (6%) upon which CRY normally confers rhythmic abundance lose that rhythm  
445 when CRY is absent, with most (5%) reaching a new equilibrium concentration for the same reason.  
446 The resultant change in abundance of >20% rhythmically regulated proteins in CKO cells may result  
447 in an adaptation that leads to a change in the composition of most of the rest of the proteome (57%)  
448 to maintain cellular homeostasis (Figure S3C). Such profound remodelling of the proteome is likely  
449 to arise as an indirect consequence of CRY-deficiency as opposed to the direct regulation of most  
450 cellular proteins by CRY.

451

452 For decades it has been argued that the adaptive advantage of cellular circadian clocks is to anticipate  
453 the differential demands of day and night, by turning on genes to accommodate predicted demand.  
454 Protein synthesis is the most energetically expensive process that most cells undertake however, and  
455 multiple mechanisms exist to inactivate and sequester proteins that are not required [1,75]. Intuitively  
456 then, it makes sense that cells would expend energy to ensure a constant abundance of most proteins  
457 – to be mobilised as and when needed. However costly though, damaged proteins do need to be  
458 degraded and replaced to avoid deleterious consequences such as aggregation. We therefore  
459 hypothesise that a fundamental advantage offered by the canonical TTFL is the temporal

460 consolidation of proteome renewal, matching synthesis and degradation rates to keep protein  
461 concentrations constant and maintain protein homeostasis overall.

462

463 In addition to regulating circadian rhythms, CRYs have also been reported to play a role in  
464 magnetoreception [76,77], autoimmunity [57], cell cycle progression [78], and DNA damage  
465 signalling [79], as well as regulation of membrane potential [80], phototransduction [80], synaptic  
466 plasticity [81], GPCR signalling [82]. CRYs are therefore seemingly multifunctional. However,  
467 CRYs have also been found to have functions in fundamental cellular process that may underlie many  
468 of these reports. For example, CRYs regulate the transcription of many genes directly [21,31] and  
469 indirectly through interactions with various nuclear receptors [83]. CRY proteins are also  
470 promiscuous E3 ligase adaptors which target >100 cellular proteins for ubiquitination by the  
471 SCF<sup>FBXL3</sup> complex to be degraded by the proteasome. These targets include CRL4<sup>COP1</sup> [84], c-MYC  
472 [85], TLK2 [86], FOXO1 [87] and E2F family members. Finally, CRYs may also mediate a more  
473 general repression of BMAL1-stimulated translation [23,64,88]. Adding to this, we found that  
474 proteasome activity was reduced in CKO cells whilst translation rate was increased, indicating a  
475 general function of CRY in protein homeostasis regulation.

476

477 It is likely that these factors all contribute to the changes in protein abundance for 82% of the  
478 proteome, that we observed in CKO cells (Figure S3C). Our observations of increased energy  
479 production and ion transport may reflect adaptations to the remodelled proteome in these cells. This  
480 adapted state in CKO cells renders them more sensitive to proteotoxic stress. We found that compared  
481 to WT, CKO cells have increased protein abundance and reduced K<sup>+</sup> levels overall, as well as higher  
482 amplitude rhythms of cytosolic protein and K<sup>+</sup>. Changes in soluble protein concentration require  
483 stoichiometrically larger changes in ion concentration to maintain osmotic homeostasis [89]. We  
484 therefore suggest that CKO cells may have an impaired ability to buffer changes in intracellular  
485 osmolarity, which may contribute to the sensitivity to stress [47,90].

486 The increased energy consumption of CKO cells, associated with impaired regulation of protein  
487 homeostasis and increased sensitivity to proteotoxic stress may have systemic consequences for the  
488 animals. We suggest that this broad range of consequences of CRY deletion may contribute to the  
489 pronounced pathophysiology previously reported in CKO mice. For example, other studies have also  
490 reported impaired body growth in CKO mice, along with dysregulated growth hormone release  
491 [91,92]. Furthermore, CKO mice have an altered response to high fat diet, characterised by increased  
492 insulin secretion and lipid storage in adipocytes [93]. Female CKO mice have impaired fertility, and  
493 this is thought to be age-dependent [94]. Finally, CKO mice have increased susceptibility to cancer,  
494 in multiple models for carcinogenesis [95–98]. It is likely that a combination of the loss of specific  
495 functions of CRY, and a general protein homeostasis function of the TTFL are responsible for these  
496 CKO mutant phenotypes, since many are not shared with other behaviourally arrhythmic circadian  
497 mutant mice [63,99,100]. Of course, further work will be required to assess how successfully the  
498 interpretation we propose accounts for the circadian function of CRYPTOCHROME *in vivo*, and that  
499 of transcriptional-translational feedback loops more generally.

500

501 In this investigation, we have not addressed the nature of the post-translational mechanism postulated  
502 to generate circadian rhythms in mammalian cells, which is discussed elsewhere [12,23]. We note,  
503 however, that oscillations of protein synthesis stimulate facilitatory metabolism and compensatory  
504 ion transport to maintain osmotic and protein homeostasis during the metabolic cycle of yeast cells  
505 [101]. The many mechanistic features shared between mammalian circadian rhythms and yeast  
506 respiratory oscillations may indicate a common ancestral origin [30].

507

508 In our kinase inference analysis, we were surprised not to find evidence supportive of circadian  
509 phosphorylation by casein kinase 1 or any of the other kinases implicated in the post-translational  
510 circadian regulation. Indeed, the very poor overlap in rhythmically phosphorylated proteins between  
511 the two genotypes, and between rhythmic phosphorylation and rhythmic protein in either genotype,

512 suggests that the circadian functions of this post-translational modification are likely to be context-  
513 dependent. As with the proteome, however, we did notice a highly significant association between  
514 change in rhythmicity and change in phosphopeptide abundance. If a similar interpretation to that  
515 which we propose for the proteome were true, it would imply that as much as 20% of protein  
516 phosphorylation is subject to cell-autonomous circadian regulation (Figure S3D), but in most cases it  
517 is matched by a dephosphorylation rhythm of similar phase and amplitude. Given the consolidation  
518 of phosphorylation rhythms around a temporal window that anticipates the active phase (Figure 2G),  
519 we speculate that the circadian regulation of dynamic steady state phosphorylation might confer more  
520 sensitive and rapid transduction of a given extracellular stimulus when received around the rest-to-  
521 active transition compared with 12 hours later. Future work will be required to test this hypothesis  
522 experimentally.

523

524 In conclusion, we have shown that CRY-dependent feedback mechanisms are not required for cell-  
525 autonomous circadian rhythms of protein abundance or phosphorylation in mammalian cells.  
526 Moreover, when CRY is present, it functions to suppress more abundance rhythms than it facilitates.  
527 Loss of CRY also creates an overall imbalance of the proteome, with reduced proteasome activity,  
528 increased protein synthesis and protein levels. Cells adapt to this genetic insult through increased  
529 energy expenditure, and by altering osmotic balance and proteome composition to achieve a different  
530 set point for protein homeostasis, that renders them more sensitive to proteotoxic stress. This state  
531 may in turn have physiological consequences for the whole animal. We propose that the principal  
532 utility of CRY-mediated feedback repression is to couple global protein synthesis and degradation  
533 rates, ensuring the temporal consolidation of proteome renewal without commensurate change in  
534 protein abundance.

535

536

537

538 **Methods**

539 **Mammalian cell culture**

540 All animal work was licensed by the Home Office under the Animals (Scientific Procedures) Act  
541 1986, with Local Ethical Review by the Medical Research Council and the University of Cambridge,  
542 UK. Fibroblasts homozygous for PER2::LUCIFERASE [102] were extracted from adult mouse lung  
543 tissue and then serial passage was used as described previously to induce spontaneous  
544 immortalisation [30,103]. Fibroblasts were cultured in Dulbecco's Modified Eagle Medium (DMEM),  
545 supplemented with 100 units/ml penicillin, 100 µg/ml streptomycin (Gibco) and 10% FetalClone III  
546 serum (HyClone, Thermo Fisher). All cells were confirmed to be free of Mycoplasma. Unless stated  
547 otherwise, confluent cell cultures up to a maximum of 30 passages were used during experiments to  
548 abolish any effects of cell division, since these cells display contact inhibition.

549

550 **General statistics**

551 P values are annotated in figures with asterisks, where the number of asterisks indicates the  
552 significance: Ns = not significant; \* =  $p \leq 0.05$ ; \*\* =  $p \leq 0.01$ , \*\*\* =  $p \leq 0.001$ ; \*\*\*\* =  $p \leq 0.0001$ .  
553 Technical replicates are denoted as “n” in the figures or figure legends (e.g. n=3), and biological  
554 replicates are denoted as “N”. Statistical tests were carried out using Prism Graphpad 8 (San Diego,  
555 Ca) or R v3.6.3.

556

557 **Longitudinal bioluminescent reporter experiments**

558 Data from longitudinal bioluminescence recordings were analysed using Prism Graphpad 8 (San  
559 Diego, Ca). A 24-hour moving average was used to detrend data, and so circa-24 hour rhythms can  
560 more easily be observed and measured. Detrending in this way removes changes in baseline that occur  
561 on a timescale greater than a day; 24-hour rhythms cannot be introduced by this method. Then a  
562 circadian damped cosine wave was fitted by least-squares regression to determine period, phase and  
563 amplitude. The formula is as follows:

564 
$$y = (mx + c) + a e^{-kx} \cos \left( \frac{2\pi x - r}{p} \right)$$

565

566 Where  $m$  is the baseline gradient,  $c$  is the displacement in the  $y$  axis,  $k$  is the damping rate,  $a$  is the  
567 amplitude,  $r$  is the phase and  $p$  is the period. The first 24 hours of each recording were omitted because  
568 this represents the transient effects of medium change on clock gene expression. Rhythmicity of  
569 bioluminescence recordings was assessed by comparing the fit of this equation to the null hypothesis  
570 of a straight line using the Extra sum-of-squares F test in Prism Graphpad 8 (San Diego, CA). If  
571 fitting to the damped cosine was preferred ( $p \leq 0.05$ ) then the recording was deemed “rhythmic”.

572

### 573 **Timecourse experiments: general structure**

574 Cells were plated at a near-confluent density (roughly 27,000 cells per  $\text{cm}^2$ ) and cultured in DMEM  
575 with 10% FetalClone III serum for one week in a temperature-controlled incubator that was  
576 programmed to oscillate between 32°C and 37°C, with transitions every 12 hours. The cells received  
577 a medium change at the transition between 37°C and 32°C after 4 days. After another 3 days the cells  
578 received another medium change at the same transition time into medium containing either 10% or  
579 1% serum, and the incubator was programmed to remain at 37°C constantly. At this time, a subset of  
580 cells received medium containing 1 mM luciferin, and these were placed into an ALLIGATOR for  
581 bioluminescent recording. After 24 hours, sampling began, with 3 hour intervals, and continuing for  
582 3 days. The time point of the first sample is known as “Experimental time 0”, and all time points are  
583 reported relative to this. The nature of the sampling varied according to the specific experiment, and  
584 details are presented in separate sections.

585

### 586 **Proteomics and phosphoproteomics**

#### 587 ***Sample preparation***

588 A timecourse was carried out as described above. At each timepoint cells were washed twice in ice  
589 cold PBS and then lysed at room temperature in 100  $\mu\text{L}$  lysis buffer (8 M urea, 20 mM Tris, pH 8)



590 for 20 minutes. The lysis buffer was prepared the day before sampling began, and frozen in 1 mL  
591 aliquots. At each timepoint, one aliquot was defrosted at room temperature (23°C) whilst shaking at  
592 700 rpm for 5 minutes. After lysis the cells were scraped and technical replicates were combined  
593 before flash freezing in liquid nitrogen and storage at -80°C.

594

595 After defrosting the samples were sonicated for 2 minutes and the protein concentration was measured  
596 using a BCA assay (Pierce). 12 pooled samples were created by combining a portion of each  
597 experimental sample such that each sample/pool contained an equal amount of protein. All samples  
598 were then flash frozen in liquid nitrogen and stored at -80°C.

599

#### 600 ***Enzymatic Digestion***

601 Each sample (256 µg) was reduced with 5 mM DTT at 56°C for 30 minutes and then alkylated with  
602 10 mM iodoacetamide in the dark at room temperature for 30 minutes. They were then digested with  
603 mass spectrometry grade Lys-C (Promega) at a protein:Lys-C ratio of 100:1 (w/w) for 4 hours at  
604 25°C. Next, the samples were diluted to 1.5 M urea using 20 mM HEPES (pH 8.5) and digested at  
605 30°C overnight with trypsin (Promega) at a ratio of 70:1 (w/w). Digestion was quenched by the  
606 addition of trifluoroacetic acid (TFA) to a final concentration of 1%. Any precipitates were removed  
607 by centrifugation at 13000g for 15 minutes. The supernatants were desalted using homemade C18  
608 stage tips containing 3M Empore extraction disks (Sigma) and 5 mg of Poros R3 resin (Applied  
609 Biosystems). Bound peptides were eluted with 30-80% acetonitrile (MeCN) in 0.1% TFA and  
610 lyophilized.

611

#### 612 ***TMT (Tandem mass tag) peptide labelling***

613 The lyophilized peptides from each sample were resuspended in 100 µl of 2.5% MeCN, 250 mM  
614 triethylammonium bicarbonate. According to manufacturer's instructions, 0.8 mg of each TMT  
615 10plex reagent (Thermo) was reconstituted in 41 µl of anhydrous MeCN. The peptides from each

616 time point and pooled sample were labelled with a distinct TMT tag for 75 minutes at room  
617 temperature. The labelling reaction was quenched by incubation with 8  $\mu$ l 5% hydroxylamine for 30  
618 min. For each set of 10-plex TMT reagent, the labelled peptides from 8 time point samples + 2 pools  
619 were combined into a single sample and partially dried to remove MeCN in a SpeedVac (Thermo  
620 Scientific). After this, the sample was desalted as before and the eluted peptides were lyophilized.

621

### 622 ***Basic pH Reverse-Phase HPLC fractionation***

623 The TMT labelled peptides were subjected to off-line High Performance Liquid Chromatography  
624 (HPLC) fractionation, using an XBridge BEH130 C18, 3.5  $\mu$ m, 4.6 mm x 250 mm column with an  
625 XBridge BEH C18 3.5  $\mu$ m Van Guard cartridge (Waters), connected to an Ultimate 3000  
626 Nano/Capillary LC System (Dionex). Peptide mixtures were resolubilized in solvent A (5% MeCN,  
627 95% 10 mM ammonium bicarbonate, pH 8) and separated with a gradient of 1-90% solvent B (90%  
628 MeCN, 10% 10 mM ammonium bicarbonate, pH 8) over 60 minutes at a flow rate of 500  $\mu$ l/min. A  
629 total of 60 fractions were collected. They were combined into 20 fractions and lyophilized and  
630 desalted as before. 5% of the total eluate from each fraction was taken out for proteome LC-MS/MS  
631 analysis and the rest was used for phosphopeptide enrichment.

632

### 633 ***Enrichment of phosphopeptides***

634 All 20 fractions of peptide mixture were enriched first using PHOS-Select iron affinity gel, an Iron  
635 (III) Immobilised Metal Chelate Affinity Chromatography (IMAC) resin (Sigma). Desalted peptides  
636 were resuspended in 30% MeCN, 0.25 M acetic acid (loading solution) and 30  $\mu$ l of IMAC beads,  
637 previously equilibrated with the loading solution, was added. After 60 minutes incubation at room  
638 temperature, beads were transferred to a homemade C8 (3M Empore) stage tip and washed 3 times  
639 with loading solution. Phosphopeptides were eluted sequentially with 0.4 M  $\text{NH}_3$ , 30% MeCN, 0.4  
640 M  $\text{NH}_3$  and 20  $\mu$ l of 50% MeCN, 0.1% TFA.

641

642 The flow-through from the C8 stage tips was collected and combined into 10 fractions, and used for  
643 titanium dioxide (TiO<sub>2</sub>) phosphopeptide enrichment. For this, the total volume of flow-through was  
644 made up to 50% MeCN, 2 M lactic acid (loading buffer) and incubated with 1-2 mg TiO<sub>2</sub> beads  
645 (Titansphere, GL Sciences, Japan) at room temperature for 1 hour. The beads were transferred into  
646 C8 stage tips, washed in the tip twice with the loading buffer and once with 50% MeCN, 0.1% TFA.  
647 Phosphopeptides were then eluted sequentially with 50 mM K<sub>2</sub>HPO<sub>4</sub> (pH 10) followed by 50%  
648 MeCN, 50 mM K<sub>2</sub>HPO<sub>4</sub> (pH 10) and 50% MeCN, 0.1% TFA.

649  
650 The first 10 fractions of IMAC and the 10 fractions of TiO<sub>2</sub> enriched phosphopeptides were combined,  
651 and the other 10 fractions from IMAC enrichment were combined into 5 fractions, thus making a  
652 total of 15 fractions for phosphoproteomics analysis. Phosphopeptide solution from these fractions  
653 were acidified, partially dried, and desalted with a C18 Stage tip that contained 1.5 µl of Poros R3  
654 resin. These were then partially dried again and thus ready for mass spectrometry analysis.

655

### 656 *LC MS/MS*

657 The fractionated peptides were analysed by LC-MS/MS using a fully automated Ultimate 3000 RSLC  
658 nano System (Thermo) fitted with a 100 µm x 2 cm PepMap100 C18 nano trap column and a 75 µm  
659 × 25 cm reverse phase C18 nano column (Acclaim PepMap, Thermo). Samples were separated using  
660 a binary gradient consisting of buffer A (2% MeCN, 0.1% formic acid) and buffer B (80% MeCN,  
661 0.1% formic acid), and eluted at 300 nL/min with an acetonitrile gradient. The outlet of the nano  
662 column was directly interfaced via a nanospray ion source to a Q Exactive Plus mass spectrometer  
663 (Thermo). The mass spectrometer was operated in standard data-dependent mode, performing a MS  
664 full-scan in the m/z range of 350-1600, with a resolution of 70000. This was followed by MS2  
665 acquisitions of the 15 most intense ions with a resolution of 35000 and Normalised Collision Energy  
666 (NCE) of 33%. MS target values of 3e6 and MS2 target values of 1e5 were used. The isolation  
667 window of precursor ion was set at 0.7 Da and sequenced peptides were excluded for 40 seconds.

668

669 ***Spectral processing and peptide and protein identification***

670 The acquired raw files from LC-MS/MS were processed using MaxQuant (Cox and Mann) with the  
671 integrated Andromeda search engine (v1.6.3.3). MS/MS spectra were quantified with reporter ion  
672 MS2 from TMT 10plex experiments and searched against the *Mus musculus* UniProt Fasta database  
673 (Dec 2016). Carbamidomethylation of cysteines was set as fixed modification, while methionine  
674 oxidation, N-terminal acetylation and phosphorylation (STY) (for phosphoproteomics group only)  
675 were set as variable modifications. Protein quantification requirements were set at 1 unique and razor  
676 peptide. In the identification tab, second peptides and match between runs were not selected. Other  
677 parameters in MaxQuant were set to default values.

678

679 The MaxQuant output file was then processed with Perseus (v1.6.2.3). Reporter ion intensities were  
680 uploaded to Perseus. The data was filtered: identifications from the reverse database were removed,  
681 only identified by site, potential contaminants were removed and we only considered proteins with  
682  $\geq 1$  unique and razor peptide. Then all columns with an intensity “less or equal to zero” were converted  
683 to “NAN” and exported as a .txt file.

684

685 The MaxQuant output file with phosphor (STY) sites table was also processed with Perseus software  
686 (v1.6.2.3). The data was filtered: identifications from the reverse database were removed, only  
687 identified by site, potential contaminants were removed and we only considered phosphopeptides  
688 with localization probability  $\geq 0.75$ . Then all columns with intensity “less or equal to zero” were  
689 converted to “NAN” and exported as a .txt file.

690

691 ***Bioinformatics***

692 All data handling was done using R v3.6.3. Since the sample for timepoint 12 was missing for CRY1<sup>-</sup>  
693 <sup>-</sup>; CRY2<sup>-</sup>, abundance values were inferred for each protein by taking the mean of the two

694 neighbouring timepoints. WT and CKO datasets were analysed either combined or independently.  
695 The combined analysis was used to directly compare protein and phosphopeptide abundances  
696 between genotypes, since the internal reference scaling normalisation accounts for batch effects. The  
697 independent method was used for all other analysis that did not require comparison of abundance,  
698 thus allowing the detection of proteins that were present in one genotype but not the other.

699  
700 Proteins and phosphopeptides were only accepted for further analysis if present in all timepoints and  
701 pooled samples. Hence in the combined analysis, proteins/phosphopeptides had to be present in all  
702 timepoints for both genotypes, as well as all pooled samples. In the independent analysis,  
703 proteins/phosphopeptides had to be present in all timepoints and pools for one genotype only. Sample  
704 loading normalisation was carried out by taking the sum of all intensities for each time point and  
705 normalising to the mean of these, since an equal amount of protein was used for each TMT labelling  
706 reaction. This was followed by internal reference scaling (IRS) to allow for comparisons between  
707 TMT experiments [104]: for each TMT 10plex set the mean abundance for each protein in both pools  
708 was calculated. Then the mean of these means was calculated and used to normalise the values for  
709 each protein for all the samples.

710  
711 Rhythmicity was tested using the RAIN (Rhythmicity Analysis Incorporating Non-parametric  
712 methods) algorithm [105], and multiple testing was corrected for using the adaptive Benjamini-  
713 Hochberg method. Proteins with a corrected  $p \leq 0.05$  were deemed significant. Relative amplitude of  
714 rhythmic proteins was calculated by detrending the data using a 24-hour moving average and dividing  
715 the resultant range by the average normalised protein abundance. To include only proteins with a  
716 biologically relevant level of oscillation, only those with relative amplitude  $\geq 10\%$  were taken for  
717 further analysis (see text for details). Phosphoproteomics data were handled in the same way, except  
718 that normalised phosphopeptide abundances were adjusted according to the changes in abundance of

719 the corresponding protein from the normalised total proteome data, and no threshold for relative  
720 amplitude was used.

721

722 Gene ontology analysis was performed using the GOrilla online tool [45,46]. Analysis was performed  
723 either as a single ranked list of gene names, or as a target dataset compared to background (all proteins  
724 detected in the experiment). Kinase recognition motifs were screened using a custom script written  
725 in Python v2.7, which used the PHOSIDA database [37,38].

726

### 727 **Western blotting**

728 For Western blots, proteins were run on NuPAGE™ Novex™ 4-12% Bis-Tris Protein Gels (Thermo  
729 Fisher) before transferring to nitrocellulose membranes. For transfer, the iBlot system (Thermo Fisher)  
730 was used. Membranes were blocked using 5% milk powder (Marvel) or 0.125% BSA (Sigma) and  
731 0.125% milk powder (Marvel) in TBS containing 0.1% Tween-20 (TBST) for 30 minutes at room  
732 temperature then incubated with primary antibody at 4°C overnight. HRP-conjugated secondary  
733 antibodies (Thermo Fisher) diluted 1:10000 in blocking buffer were incubated with the blots for 1  
734 hour at room temperature. Chemiluminescence was detected in a Biorad chemidoc using Immobilon  
735 reagent (Millipore). Protein loading was checked by staining gels with Colloidal Coomassie Blue  
736 Stain (Severn Biotech). Densitometric analysis was carried out using Image Lab 4.1 (Biorad  
737 Laboratories 2012).

738

### 739 **Measurement of cellular protein content**

740 At specified time points, confluent monolayers of cells were washed twice with ice-cold PBS. Cells  
741 were then incubated with 200 µL digitonin lysis buffer (50 mM Tris pH 7.4, 0.01% digitonin, 5 mM  
742 EDTA, 150 mM NaCl, 1 U/mL Benzonase, protease and phosphatase inhibitors) on ice for 15 minutes  
743 before lysates were collected. For total protein extraction, cells were instead incubated with 200 µL  
744 RIPA buffer (50 mM Tris pH 7.4, 1% SDS, 5 mM EDTA, 150 mM NaCl, 1 U/mL Benzonase,

745 protease and phosphatase inhibitors), on ice for 15 minutes. Cells lysed with RIPA buffer were then  
746 scraped and collected and all samples were flash frozen in liquid nitrogen. After thawing, RIPA  
747 lysates were sonicated at high power for 10 seconds at 4°C to shear genomic DNA. RIPA lysates and  
748 digitonin lysates were clarified by centrifugation at 21,000 g for 15 minutes at 4°C.

749

750 Intrinsic tryptophan fluorescence was used to measure protein concentrations. 10 µL of each sample  
751 was transferred into a UV-transparent 384 well plate (Corning 4681) in quadruplicate. After brief  
752 centrifugation of the plate, quantification was carried out using a Tecan Spark 10M microplate reader,  
753 with excitation at 280 nm and emission at 350 nm. Standards were made using bovine serum albumin  
754 (Fisher Scientific), dissolved using the same lysis buffer as the lysates being measured. Standard  
755 curves were fitted to a quadratic curve using Prism Graphpad 8 (San Diego, Ca), and protein  
756 concentrations were interpolated.

757

#### 758 **Measurement of intracellular ion content by Inductively Coupled Plasma - Mass Spectrometry** 759 **(ICP-MS)**

760 Confluent monolayers of cells were washed on ice with iso-osmotic buffer A (300 mM sucrose, 10  
761 mM Tris base, 1 mM EDTA, pH 7.4 adjusted with phosphoric acid, 330-340 mOsm adjusted with  
762 sucrose/HPLC water), followed by iso-osmotic buffer B (300 mM sucrose, 10 mM Tris base, 1 mM  
763 EDTA, pH 7.4 adjusted with acetic acid, 330-340 mOsm adjusted with sucrose/HPLC water). Iso-  
764 osmotic buffer A contains phosphoric acid which displaces lipid bound ions. Iso-osmotic buffer B  
765 contains acetic acid which removes traces of phosphates. Cells were then incubated for 30 minutes at  
766 room temperature in 200 µL ICP-MS cell lysis buffer (65% nitric acid, 0.1 mg/mL (100 ppb) cerium).  
767 Lysates were then collected and stored at -80°C. All samples were thawed simultaneously and diluted  
768 using HPLC water to a final concentration of 5% nitric acid. Diluted samples were analysed by  
769 Inductively Coupled Plasma - Mass Spectrometry (ICP-MS) using the NexION 350D ICP-MS  
770 (PerkinElmer Inc.) as described previously [8].

771

772 **Proteasome activity assays**

773 20,000 cells per well were plated in a 96-well plate using standard culture medium, and on the  
774 following day the medium was changed. 10  $\mu$ M epoxomicin in the medium was used as negative  
775 control. 3 hours later, the ProteasomeGlo Cell-Based Assay (Promega) was used to measure  
776 proteasome catalytic activity. Chymotrypsin-like, trypsin-like and caspase-like activities were  
777 measured separately using the relevant substrates from Promega (Suc-LLVY-Glo, Z-LRR-Glo, Z-  
778 nLPnLD-Glo respectively). Assay reagents were prepared according to the manufacturer's  
779 instructions. The 96-well plate was equilibrated to room temperature, and a volume of assay reagent  
780 equal to the volume of medium was added to each well before shaking at 700 rpm for 2 minutes. The  
781 plate was incubated at room temperature for a further 10 minutes, and then luminescence was  
782 measured using the Tecan Spark 10M microplate reader, recording counts for 1 second. The  
783 luminescence readings from the epoxomicin controls represent background protease activity, and so  
784 this was subtracted from all other recordings.

785

786 **Measurement of translation rate**

787 WT and CKO mouse lung fibroblasts were grown to confluence in 48-well plates, and medium was  
788 changed 24h before the experiment to either low (1%) or high (10%) serum. The cells were pulsed  
789 with 0.1 mCi/ml <sup>35</sup>S-L-methionine/<sup>35</sup>S-L-cysteine mix (EasyTag™ EXPRESS35S Protein Labeling  
790 Mix, Perkin Elmer) in cysteine/methionine-free DMEM for 15 min at 37°C, with or without serum  
791 supplement. Afterwards, cells were washed with ice-cold PBS and lysed in digitonin-based buffer  
792 (with protease inhibitor tablet, added freshly) on ice. Lysates were reduced with LDS buffer and run  
793 on 4-12% Bis-Tris SDS-PAGE using MES buffer. Gels were then dried at 80°C and exposed  
794 overnight to a phosphorimager screen. Images were acquired with Typhoon FLA700 gel scanner, and  
795 quantified using Fiji.

796



797 For the puromycin pulse experiment, cells were seeded (in the presence of 1 mM luciferin) in  
798 fibronectin-coated dishes at high density one day before starting the experiment. Separate 6-well  
799 plates were used for each time point. 30 minutes before the start of the experiment, cells were  
800 synchronised by a dexamethasone pulse (10 nM), after which cells were exchanged into Air medium  
801 (DMEM without glucose, L-glutamine, phenol red, sodium pyruvate and sodium bicarbonate (Sigma).  
802 The following were added: 0.35 g/L sodium bicarbonate (Sigma), 5 g/L glucose (Sigma), 20 mM  
803 MOPS (VWR), penicillin/streptomycin solution (as above), Glutamax (Thermo Fisher), B27  
804 (Thermo Fisher), 1 mM potassium luciferin solution (Biosyth), 1% FetalClone III serum. The medium  
805 was adjusted to pH 7.6 at room temperature, and osmolality adjusted to 350-360 mOsm/kg using  
806 sodium chloride). At the indicated time points, 10 µg/mL puromycin was added while keeping cells  
807 warm on a hot plate, after which the plate was incubated in tissue culture incubator for exactly 10  
808 minutes. Timepoint 0 represents cells just before the dexamethasone pulse. Cells were then washed  
809 with ice-cold PBS, after which they were lysed in lysis buffer (50 mM tris, pH 7.5, 1% Triton X-  
810 100, 0.1% SDS, 1.5 mM MgCl<sub>2</sub>, 100 mM NaCl, cOmplete protease inhibitor cocktail (Roche)) and  
811 flash frozen. For Western blot analysis, samples were spun down, diluted in Laemmli sample buffer,  
812 ran on 4-20% gradient gels, and blots were probed for ATF4 and tubulin.

813

#### 814 **Metabolic profiling of cells in culture**

815 To characterise the metabolic profile of cells in culture metabolic assays from Seahorse Biosciences  
816 were used [106,107] to measure extracellular acidification rate (ECAR) and oxygen consumption rate  
817 (OCR) according to manufacturer's instructions (Agilent). 18,000 cells per well were plated in a 24-  
818 well cell culture microplate (Agilent) and incubated at 37°C overnight to adhere the cells. Empty  
819 wells in positions recommended by the manufacturer were used to assess background. Cells were  
820 then changed into warm "Seahorse medium" (DMEM without phenol red or bicarbonate, 4.5 g/L  
821 glucose, 1 mM pyruvate, 4 mM glutamine), and incubated for 30 minutes in a CO<sub>2</sub>-free incubator at  
822 37°C for equilibration. An Agilent Seahorse XFe24 Analyser was then used to measure OCR and

823 ECAR, with injection of antimycin diluted in Seahorse medium at a working concentration of 1  $\mu$ M  
824 after the assay as a negative control.

825

826 **Antibodies**

| <b>Antibody name/target</b> | <b>Host species</b> | <b>Catalogue number</b> | <b>Manufacturer</b>         |
|-----------------------------|---------------------|-------------------------|-----------------------------|
| Anti-mouse-HRP              | Goat                | A4416                   | Sigma                       |
| Anti-rabbit-HRP             | Goat                | A6154                   | Sigma                       |
| Anti-rat-HRP                | Goat                | 629520                  | Thermo                      |
| Tubulin YL1-2               | Rat                 |                         | in-house                    |
| Proteasome 20S alpha 1-7    | Mouse               | ab22674                 | Abcam                       |
| EIF2a                       | Mouse               | AhO0802                 | Thermo                      |
| P-EIF2a                     | Rabbit              | ab32157                 | Abcam                       |
| ATF4 (CREB-2)               | Mouse               | sc-390063               | Santa-Cruz<br>Biotechnology |
| Histone H3                  | Rabbit              | ab1791                  | Abcam                       |

827

828

829 **Acknowledgements**

830 We thank biomedical technical staff at Medical Research Council (MRC) Ares facility and LMB  
831 facilities for assistance; G.T. van der Horst and J.S. Takahashi for sharing rodent models; Y-G. Suh,  
832 M.H. Hastings and E.S. Maywood for providing reagents and input; M. Hegde, E. Zavodszky, R.  
833 Edgar, N. Hoyle, M. Coetzee, J. Chesham, A. Hufnagel, P. Crosby, D.S. Tourigny, J.E. Chambers,  
834 H.C. Causton and Tim Stevens for assistance with analysis and experiments as well as valuable  
835 discussion. DCSW was supported by the MRC Doctoral Training Programme and the Frank Edward  
836 Elmore Fund. AS was supported by the AstraZeneca Blue Skies Initiative. NMR was supported by  
837 the Medical Research Council (MR/S022023/1). MP was supported by the Dutch Cancer Foundation  
838 (KWF, BUIT-2014-6637) and EMBO (ALTF-654-2014). JON was supported by the Medical  
839 Research Council (MC\_UP\_1201/4) and the Wellcome Trust (093734/Z/10/Z).

840

841 **Contributions**

842 DCSW, ES and JON designed the study, analysed the data and wrote the manuscript; DCSW, ES,  
843 AS, AZ and MP performed cell experiments; SPC and JD performed mass spectrometry analyses;  
844 DCSW, NMR, ADB and JON performed mouse studies; MR performed tissue collection and  
845 husbandry. All authors commented on the manuscript.

846

847 **Conflicts of interest**

848 The authors declare that they have no conflict of interest.

849

850 **References**

- 851 1. Wolff S, Weissman JS, Dillin A: **Differential Scales of Protein Quality Control**. *Cell* 2014,  
852 **157**:52–64.
- 853 2. Juskiewicz S, Hegde RS: **Quality Control of Orphaned Proteins**. *Mol Cell* 2018, **71**:443–  
854 457.
- 855 3. Harper JW, Bennett EJ: **Proteome complexity and the forces that drive proteome**  
856 **imbalance**. *Nature* 2016, **537**:328–338.
- 857 4. Labbadia J, Morimoto RI: **The Biology of Proteostasis in Aging and Disease**. *Annu Rev*  
858 *Biochem* 2015, **84**:435–464.
- 859 5. Balchin D, Hayer-Hartl M, Hartl FU: **In vivo aspects of protein folding and quality control**.  
860 *Science* 2016, **353**:aac4354.
- 861 6. Cederroth CR, Albrecht U, Bass J, Brown SA, Dyhrfeld-Johnsen J, Gachon F, Green CB,  
862 Hastings MH, Helfrich-Förster C, Hogenesch JB, et al.: **Medicine in the Fourth Dimension**.  
863 *Cell Metab* 2019, **30**:238–250.
- 864 7. Jouffe C, Cretenet G, Symul L, Martin E, Atger F, Naef F, Gachon F: **The Circadian Clock**  
865 **Coordinates Ribosome Biogenesis**. *PLoS Biol* 2013, **11**.
- 866 8. Feeney KA, Hansen LL, Putker M, Olivares-Yañez C, Day J, Eades LJ, Larrondo LF, Hoyle  
867 NP, O’Neill JS, van Ooijen G: **Daily magnesium fluxes regulate cellular timekeeping and**  
868 **energy balance**. *Nature* 2016, **532**:375–379.
- 869 9. Hoyle NP, Seinkmane E, Putker M, Feeney KA, Krogager TP, Chesham JE, Bray LK, Thomas  
870 JM, Dunn K, Blaikley J, et al.: **Circadian actin dynamics drive rhythmic fibroblast**  
871 **mobilization during wound healing**. *Sci Transl Med* 2017, **9**:eaal2774.
- 872 10. Reddy AB, Karp NA, Maywood ES, Sage EA, Deery M, O’Neill JS, Wong GKY, Chesham J,  
873 Odell M, Lilley KS, et al.: **Circadian Orchestration of the Hepatic Proteome**. *Curr Biol*  
874 2006, **16**:1107–1115.
- 875 11. Crosby P, Hamnett R, Putker M, Hoyle NP, Reed M, Karam CJ, Maywood ES, Stangherlin A,

- 876 Chesham JE, Hayter EA, et al.: **Insulin/IGF-1 Drives PERIOD Synthesis to Entrain**  
877 **Circadian Rhythms with Feeding Time.** *Cell* 2019, **177**:896-909.e20.
- 878 12. Wong DC, O'Neill JS: **Non-transcriptional processes in circadian rhythm generation.**  
879 *Curr Opin Physiol* 2018, **5**:117–132.
- 880 13. Takahashi JS: **Transcriptional architecture of the mammalian circadian clock.** *Nat Rev*  
881 *Genet* 2016, **18**:164–179.
- 882 14. Ukai H, Ueda HR: **Systems Biology of Mammalian Circadian Clocks.** *Annu Rev Physiol*  
883 2010, **72**:579–603.
- 884 15. Rosbash M: **The Implications of Multiple Circadian Clock Origins.** *PLoS Biol* 2009,  
885 **7**:e1000062.
- 886 16. Ye R, Selby CP, Chiou Y-Y, Ozkan-Dagliyan I, Gaddameedhi S, Sancar A: **Dual modes of**  
887 **CLOCK:BMAL1 inhibition mediated by Cryptochrome and Period proteins in the**  
888 **mammalian circadian clock.** *Genes Dev* 2014, **28**:1989–98.
- 889 17. Chiou Y-Y, Yang Y, Rashid N, Ye R, Selby CP, Sancar A: **Mammalian Period represses**  
890 **and de-represses transcription by displacing CLOCK-BMAL1 from promoters in a**  
891 **Cryptochrome-dependent manner.** *Proc Natl Acad Sci U S A* 2016, **113**:E6072–E6079.
- 892 18. Kume K, Zylka MJ, Sriram S, Shearman LP, Weaver DR, Jin X, Maywood ES, Hastings MH,  
893 Reppert SM: **mCRY1 and mCRY2 are essential components of the negative limb of the**  
894 **circadian clock feedback loop.** *Cell* 1999, **98**:193–205.
- 895 19. Sato TK, Yamada RG, Ukai H, Baggs JE, Miraglia LJ, Kobayashi TJ, Welsh DK, Kay SA,  
896 Ueda HR, Hogenesch JB: **Feedback repression is required for mammalian circadian clock**  
897 **function.** *Nat Genet* 2006, **38**:312–319.
- 898 20. van der Horst GT, Muijtjens M, Kobayashi K, Takano R, Kanno S, Takao M, de Wit J, Verkerk  
899 A, Ekerdt P, van Leenen D, et al.: **Mammalian Cry1 and Cry2 are essential for**  
900 **maintenance of circadian rhythms.** *Nature* 1999, **398**:627–30.
- 901 21. Ukai-Tadenuma M, Yamada RG, Xu H, Ripperger JA, Liu AC, Ueda HR: **Delay in feedback**

- 902            **repression by cryptochrome 1 is required for circadian clock function.** *Cell* 2011,  
903            **144:268–281.**
- 904 22. Ode KL, Ukai H, Susaki EA, Narumi R, Matsumoto K, Hara J, Koide N, Abe T, Kanemaki  
905 MT, Kiyonari H, et al.: **Knockout-Rescue Embryonic Stem Cell-Derived Mouse Reveals**  
906 **Circadian-Period Control by Quality and Quantity of CRY1.** *Mol Cell* 2017, **65:176–190.**
- 907 23. Putker M, Wong D, Seinkmane E, Rzechorzek NM, Zeng A, Hoyle NP, Chesham JE, Edwards  
908 MD, Feeney KA, Fischer R, et al.: **CRYPTOCHROMES confer robustness, not**  
909 **rhythmicity, to circadian timekeeping.** *bioRxiv* 2020, doi:10.1101/2020.05.14.095968.
- 910 24. Ray S, Valekunja UK, Stangherlin A, Howell SA, Snijders AP, Damodaran G, Reddy AB:  
911 **Circadian rhythms in the absence of the clock gene Bmal1.** *Science (80- )* 2020, **367:800–**  
912 **806.**
- 913 25. Henslee EA, Crosby P, Kitcatt SJ, Parry JSW, Bernardini A, Abdallat RG, Braun G, Fatoyinbo  
914 HO, Harrison EJ, Edgar RS, et al.: **Rhythmic potassium transport regulates the circadian**  
915 **clock in human red blood cells.** *Nat Commun* 2017, **8:1978.**
- 916 26. Beale AD, Kruchek E, Kitcatt SJ, Henslee EA, Parry JSW, Braun G, Jabr R, von Schantz M,  
917 O’Neill JS, Labeed FH: **Casein Kinase 1 Underlies Temperature Compensation of**  
918 **Circadian Rhythms in Human Red Blood Cells.** *J Biol Rhythms* 2019, **34:144–153.**
- 919 27. O’Neill J, Reddy A: **Circadian clocks in human red blood cells.** *Nature* 2011, **469:498–503.**
- 920 28. Edgar RS, Green EW, Zhao Y, van Ooijen G, Olmedo M, Qin X, Xu Y, Pan M, Valekunja  
921 UK, Feeney KA, et al.: **Peroxiredoxins are conserved markers of circadian rhythms.**  
922 *Nature* 2012, **485:459.**
- 923 29. Hastings MH, Maywood ES, O’Neill JS: **Cellular Circadian Pacemaking and the Role of**  
924 **Cytosolic Rhythms.** *Curr Biol* 2008, **18:R805–R815.**
- 925 30. Causton HC, Feeney KA, Ziegler CA, O’Neill JS: **Metabolic Cycles in Yeast Share Features**  
926 **Conserved among Circadian Rhythms.** *Curr Biol* 2015, **25:1056–1062.**
- 927 31. Koike N, Yoo S-H, Huang H-C, Kumar V, Lee C, Kim T-K, Takahashi JS: **Transcriptional**

- 928 **architecture and chromatin landscape of the core circadian clock in mammals.** *Science*  
929 2012, **338**:349–54.
- 930 32. Elowitz MB, Levine AJ, Siggia ED, Swain PS: **Stochastic gene expression in a single cell.**  
931 *Science (80- )* 2002, **297**:1183–1186.
- 932 33. Raser JM, O’Shea EK: **Control of stochasticity in eukaryotic gene expression.** *Science (80- )*  
933 2004, **304**:1811–1814.
- 934 34. Volfson D, Marciniak J, Blake WJ, Ostroff N, Tsimring LS, Hasty J: **Origins of extrinsic**  
935 **variability in eukaryotic gene expression.** *Nature* 2006, **439**:861–864.
- 936 35. Sigal A, Milo R, Cohen A, Geva-Zatorsky N, Klein Y, Liron Y, Rosenfeld N, Danon T, Perzov  
937 N, Alon U: **Variability and memory of protein levels in human cells.** *Nature* 2006, **444**:643–  
938 646.
- 939 36. Pedraza JH, Van Oudenaarden A: **Noise propagations in gene networks.** *Science (80- )* 2005,  
940 **307**:1965–1969.
- 941 37. Gnad F, Gunawardena J, Mann M: **PHOSIDA 2011: The posttranslational modification**  
942 **database.** *Nucleic Acids Res* 2011, **39**:253–260.
- 943 38. Gnad F, Ren S, Cox J, Olsen J V., Macek B, Oroshi M, Mann M: **PHOSIDA**  
944 **(phosphorylation site database): Management, structural and evolutionary investigation,**  
945 **and prediction of phosphosites.** *Genome Biol* 2007, **8**.
- 946 39. Lück S, Thurley K, Thaben PF, Westermark PO: **Rhythmic Degradation Explains and**  
947 **Unifies Circadian Transcriptome and Proteome Data.** *Cell Rep* 2014, **9**:741–751.
- 948 40. Cheng Y, Chi Y, Zhang L, Wang GZ: **A single factor dominates the behavior of rhythmic**  
949 **genes in mouse organs.** *BMC Genomics* 2019, **20**:879.
- 950 41. Wang G-Z, Hickey SL, Shi L, Huang H-C, Nakashe P, Koike N, Tu BP, Takahashi JS,  
951 Konopka G: **Cycling Transcriptional Networks Optimize Energy Utilization on a Genome**  
952 **Scale.** *Cell Rep* 2015, **13**:1868–80.
- 953 42. Marshall RS, Vierstra RD: **Dynamic regulation of the 26S proteasome: From synthesis to**

- 954        **degradation.** *Front Mol Biosci* 2019, **6**:40.
- 955    43.    Buttgereit F, Brandt MD: **A hierarchy of ATP-consuming processes in mammalian cells.**
- 956        *Biochem J* 1995, **312**:163–167.
- 957    44.    Rolfe DFS, Brown GC: **Cellular energy utilization and molecular origin of standard**
- 958        **metabolic rate in mammals.** *Physiol Rev* 1997, **77**:731–758.
- 959    45.    Eden E, Navon R, Steinfeld I, Lipson D, Yakhini Z: **GOrilla: A tool for discovery and**
- 960        **visualization of enriched GO terms in ranked gene lists.** *BMC Bioinformatics* 2009, **10**.
- 961    46.    Eden E, Lipson D, Yogev S, Yakhini Z: **Discovering motifs in ranked lists of DNA**
- 962        **sequences.** *PLoS Comput Biol* 2007, **3**:0508–0522.
- 963    47.    Danziger J, Zeidel ML: **Osmotic homeostasis.** *Clin J Am Soc Nephrol* 2015, **10**:852–62.
- 964    48.    Pakos-Zebrucka K, Koryga I, Mnich K, Ljujic M, Samali A, Gorman AM: **The integrated**
- 965        **stress response.** *EMBO Rep* 2016, **17**:1374–1395.
- 966    49.    Kroemer G, Mariño G, Levine B: **Autophagy and the integrated stress response.** *Mol Cell*
- 967        2010, **40**:280–93.
- 968    50.    Klaips CL, Jayaraj GG, Hartl FU: **Pathways of cellular proteostasis in aging and disease.** *J*
- 969        *Cell Biol* 2018, **217**:51–63.
- 970    51.    Heifetz A, Keenan RW, Elbein AD: **Mechanism of action of tunicamycin on the UDP-**
- 971        **GlcNAc:dolichyl-phosphate GlcNAc-1-phosphate transferase.** *Biochemistry* 1979,
- 972        **18**:2186–2192.
- 973    52.    Osowski CM, Urano F: **Measuring ER stress and the unfolded protein response using**
- 974        **mammalian tissue culture system.** *Methods Enzymol* 2011, **490**:71–92.
- 975    53.    Chun SK, Jang J, Chung S, Yun H, Kim NJ, Jung JW, Son GH, Suh YG, Kim K: **Identification**
- 976        **and validation of cryptochrome inhibitors that modulate the molecular circadian clock.**
- 977        *ACS Chem Biol* 2014, **9**:703–710.
- 978    54.    Chun SK, Chung S, Kim HD, Lee JH, Jang J, Kim J, Kim D, Son GH, Oh YJ, Suh YG, et al.:
- 979        **A synthetic cryptochrome inhibitor induces anti-proliferative effects and increases**



- 980           **chemosensitivity in human breast cancer cells.** *Biochem Biophys Res Commun* 2015,  
981           **467:441–446.**
- 982 55. Chiu SC, Liu HH, Chen CL, Chen PR, Liu MC, Lin SZ, Chang KT: **Extramedullary**  
983           **hematopoiesis (EMH) in laboratory animals: Offering an insight into stem cell research.**  
984           *Cell Transplant* 2015, **24:349–366.**
- 985 56. Johns JL, Christopher MM: **Extramedullary Hematopoiesis: A New Look at the**  
986           **Underlying Stem Cell Niche, Theories of Development, and Occurrence in Animals.** *Vet*  
987           *Pathol* 2012, **49:508–523.**
- 988 57. Cao Q, Zhao X, Bai J, Gery S, Sun H, Lin DC, Chen Q, Chen Z, Mack L, Yang H, et al.:  
989           **Circadian clock cryptochrome proteins regulate autoimmunity.** *Proc Natl Acad Sci U S A*  
990           2017, **114:12548–12553.**
- 991 58. Hand LE, Hopwood TW, Dickson SH, Walker AL, Loudon ASI, Ray DW, Bechtold DA,  
992           Gibbs JE: **The circadian clock regulates inflammatory arthritis.** *FASEB J* 2016, **30:3759–**  
993           **3770.**
- 994 59. Lamia KA, Papp SJ, Yu RT, Barish GD, Uhlenhaut NH, Jonker JW, Downes M, Evans RM:  
995           **Cryptochromes mediate rhythmic repression of the glucocorticoid receptor.** *Nature* 2011,  
996           **480:552–556.**
- 997 60. Narasimamurthy R, Hatori M, Nayak SK, Liu F, Panda S, Verma IM: **Circadian clock protein**  
998           **cryptochrome regulates the expression of proinflammatory cytokines.** *Proc Natl Acad Sci*  
999           *U S A* 2012, **109:12662–12667.**
- 1000 61. Millius A, Ode KL, Ueda HR: **A period without PER: understanding 24-hour rhythms**  
1001           **without classic transcription and translation feedback loops.** *F1000Research* 2019, **8.**
- 1002 62. Cho C-S, Yoon HJ, Kim JY, Woo HA, Rhee SG: **Circadian rhythm of hyperoxidized**  
1003           **peroxiredoxin II is determined by hemoglobin autoxidation and the 20S proteasome in**  
1004           **red blood cells.** *Proc Natl Acad Sci* 2014, **111:12043–12048.**
- 1005 63. Yu EA, Weaver DR: **Disrupting the circadian clock: Gene-specific effects on aging, cancer,**

- 1006           **and other phenotypes.** *Aging (Albany NY)* 2011, **3**:479–493.
- 1007   64.   Lipton JO, Yuan ED, Boyle LM, Ebrahimi-Fakhari D, Kwiatkowski E, Nathan A, Güttler T,  
1008   Davis F, Asara JM, Sahin M: **The Circadian Protein BMAL1 Regulates Translation in**  
1009   **Response to S6K1-Mediated Phosphorylation.** *Cell* 2015, **161**:1138–1151.
- 1010   65.   Jang C, Lahens NF, Hogenesch JB, Sehgal A: **Ribosome profiling reveals an important role**  
1011   **for translational control in circadian gene expression.** *Genome Res* 2015,  
1012   doi:10.1101/gr.191296.115.4.
- 1013   66.   Sinturel F, Gerber A, Mauvoisin D, Wang J, Gatfield D, Stubblefield JJ, Green CB, Gachon F,  
1014   Schibler U: **Diurnal Oscillations in Liver Mass and Cell Size Accompany Ribosome**  
1015   **Assembly Cycles.** *Cell* 2017, **169**:651–663.e14.
- 1016   67.   Desvergne A, Ugarte N, Radjei S, Gareil M, Petropoulos I, Friguet B: **Circadian modulation**  
1017   **of proteasome activity and accumulation of oxidized protein in human embryonic kidney**  
1018   **HEK 293 cells and primary dermal fibroblasts.** *Free Radic Biol Med* 2016, **94**:195–207.
- 1019   68.   Ma D, Lin JD: **Circadian regulation of autophagy rhythm through transcription factor**  
1020   **C/EBP $\beta$ .** *Autophagy* 2012, **8**:124–125.
- 1021   69.   Ma D, Panda S, Lin JD: **Temporal orchestration of circadian autophagy rhythm by**  
1022   **C/EBP $\beta$ .** *EMBO J* 2011, **30**:4642–4651.
- 1023   70.   Deery MJ, Maywood ES, Chesham JE, Sládek M, Karp NA, Green EW, Charles PD, Reddy  
1024   AB, Kyriacou CP, Lilley KS, et al.: **Proteomic analysis reveals the role of synaptic vesicle**  
1025   **cycling in sustaining the suprachiasmatic circadian clock.** *Curr Biol* 2009, **19**:2031–6.
- 1026   71.   Robles MS, Cox J, Mann M: **In-Vivo Quantitative Proteomics Reveals a Key Contribution**  
1027   **of Post-Transcriptional Mechanisms to the Circadian Regulation of Liver Metabolism.**  
1028   *PLoS Genet* 2014, **10**.
- 1029   72.   Mauvoisin D, Wang J, Jouffe C, Martin E, Atger F, Waridel P, Quadroni M, Gachon F, Naef  
1030   F: **Circadian clock-dependent and -independent rhythmic proteomes implement distinct**  
1031   **diurnal functions in mouse liver.** *Proc Natl Acad Sci U S A* 2014, **111**:167–72.

- 1032 73. Rey G, Milev NB, Valekunja UK, Ch R, Ray S, Santos MS Dos, Nagy AD, Antrobus R,  
1033 MacRae JI, Reddy AB: **Metabolic oscillations on the circadian time scale in *Drosophila***  
1034 **cells lacking clock genes.** *Mol Syst Biol* 2018, **14**:e8376.
- 1035 74. Hurley JM, Jankowski MS, De Los Santos H, Crowell AM, Fordyce SB, Zucker JD, Kumar  
1036 N, Purvine SO, Robinson EW, Shukla A, et al.: **Circadian Proteomic Analysis Uncovers**  
1037 **Mechanisms of Post-Transcriptional Regulation in Metabolic Pathways.** *Cell Syst* 2018,  
1038 **7**:613-626.e5.
- 1039 75. Hipp MS, Kasturi P, Hartl FU: **The proteostasis network and its decline in ageing.** *Nat Rev*  
1040 *Mol Cell Biol* 2019, **20**:421–435.
- 1041 76. Bazalova O, Kvicalova M, Valkova T, Slaby P, Bartos P, Netusil R, Tomanova K, Braeunig  
1042 P, Lee H-J, Sauman I, et al.: **Cryptochrome 2 mediates directional magnetoreception in**  
1043 **cockroaches.** *Proc Natl Acad Sci U S A* 2016, **113**:1660–5.
- 1044 77. Gegear RJ, Foley LE, Casselman A, Reppert SM: **Animal cryptochromes mediate**  
1045 **magnetoreception by an unconventional photochemical mechanism.** *Nature* 2010,  
1046 **463**:804–7.
- 1047 78. Destici E, Oklejewicz M, Saito S, van der Horst GTJ: **Mammalian cryptochromes impinge**  
1048 **on cell cycle progression in a circadian clock-independent manner.** *Cell Cycle* 2011,  
1049 **10**:3788–97.
- 1050 79. Papp SJ, Huber AL, Jordan SD, Kriebs A, Nguyen M, Moresco JJ, Yates JR, Lamia KA: **DNA**  
1051 **damage shifts circadian clock time via hausp-dependent cry1 stabilization.** *Elife* 2015,  
1052 **2015**:1–19.
- 1053 80. Baik LS, Au DD, Nave C, Foden AJ, Enrriquez-Villalva WK, Holmes TC: **Distinct**  
1054 **mechanisms of *Drosophila* CRYPTOCHROME-mediated light-evoked membrane**  
1055 **depolarization and in vivo clock resetting.** *Proc Natl Acad Sci U S A* 2019, **116**:23339–  
1056 23344.
- 1057 81. Damulewicz M, Mazzotta GM, Sartori E, Rosato E, Costa R, Pyza EM: **Cryptochrome Is a**

- 1058 **Regulator of Synaptic Plasticity in the Visual System of *Drosophila melanogaster*.** *Front*  
1059 *Mol Neurosci* 2017, **10**:165.
- 1060 82. Zhang EE, Liu Y, Dentin R, Pongsawakul PY, Liu AC, Hirota T, Nusinow DA, Sun X, Landais  
1061 S, Kodama Y, et al.: **Cryptochrome mediates circadian regulation of cAMP signaling and**  
1062 **hepatic gluconeogenesis.** *Nat Med* 2010, **16**:1152–1156.
- 1063 83. Kriebs A, Jordan SD, Soto E, Henriksson E, Sandate CR, Vaughan ME, Chan AB, Duglan D,  
1064 Papp SJ, Huber A-L, et al.: **Circadian repressors CRY1 and CRY2 broadly interact with**  
1065 **nuclear receptors and modulate transcriptional activity.** *Proc Natl Acad Sci* 2017,  
1066 **114**:8776–8781.
- 1067 84. Rizzini L, Levine DC, Perelis M, Bass J, Peek CB, Pagano M: **Cryptochromes-Mediated**  
1068 **Inhibition of the CRL4Cop1-Complex Assembly Defines an Evolutionary Conserved**  
1069 **Signaling Mechanism.** *Curr Biol* 2019, **29**:1954-1962.e4.
- 1070 85. Huber AL, Papp SJ, Chan AB, Henriksson E, Jordan SD, Kriebs A, Nguyen M, Wallace M,  
1071 Li Z, Metallo CM, et al.: **CRY2 and FBXL3 Cooperatively Degrade c-MYC.** *Mol Cell* 2016,  
1072 **64**:774–789.
- 1073 86. Correia SP, Chan AB, Vaughan M, Zolboot N, Perea V, Huber A-L, Kriebs A, Moresco JJ,  
1074 Yates JR, Lamia KA: **The circadian E3 ligase complex SCFFBXL3+CRY targets TLK2.**  
1075 *Sci Rep* 2019, **9**:198.
- 1076 87. Jang H, Lee GY, Selby CP, Lee G, Jeon YG, Lee JH, Cheng KKY, Titchenell P, Birnbaum  
1077 MJ, Xu A, et al.: **SREBP1c-CRY1 signalling represses hepatic glucose production by**  
1078 **promoting FOXO1 degradation during refeeding.** *Nat Commun* 2016, **7**.
- 1079 88. Lipton JO, Boyle LM, Yuan ED, Hochstrasser KJ, Chifamba FF, Nathan A, Tsai PT, Davis F,  
1080 Sahin M: **Aberrant Proteostasis of BMAL1 Underlies Circadian Abnormalities in a**  
1081 **Paradigmatic mTOR-opathy.** *Cell Rep* 2017, **20**:868–880.
- 1082 89. Freedman J: *Cell Physiology Source Book*. Academic Press; 2012.
- 1083 90. Hoffmann EK, Lambert IH, Pedersen SF: **Physiology of Cell Volume Regulation in**

- 1084 **Vertebrates.** *Physiol Rev* 2009, **89**:193–277.
- 1085 91. Bur IM, Cohen-Solal AM, Carmignac D, Abecassis PY, Chauvet N, Martin AO, van der Horst  
1086 GTJ, Robinson ICAF, Maurel P, Mollard P, et al.: **The circadian clock components CRY1  
1087 and CRY2 are necessary to sustain sex dimorphism in mouse liver metabolism.** *J Biol  
1088 Chem* 2009, **284**:9066–73.
- 1089 92. Masuki S, Todo T, Nakano Y, Okamura H, Nose H: **Reduced  $\alpha$ -adrenoceptor  
1090 responsiveness and enhanced baroreflex sensitivity in Cry-deficient mice lacking a  
1091 biological clock.** *J Physiol* 2005, **566**:213–224.
- 1092 93. Barclay JL, Shostak A, Leliavski A, Tsang AH, Johren O, Muller-Fielitz H, Landgraf D,  
1093 Naujokat N, van der Horst GTJ, Oster H: **High-fat diet-induced hyperinsulinemia and  
1094 tissue-specific insulin resistance in Cry-deficient mice.** *AJP Endocrinol Metab* 2013,  
1095 **304**:E1053–E1063.
- 1096 94. Takasu NN, Nakamura TJ, Tokuda IT, Todo T, Block GD, Nakamura W: **Recovery from  
1097 Age-Related Infertility under Environmental Light-Dark Cycles Adjusted to the  
1098 Intrinsic Circadian Period.** *Cell Rep* 2015, **12**:1407–1413.
- 1099 95. Chan AB, Lamia KA: **Cancer, hear my battle CRY.** *J Pineal Res* 2020,  
1100 doi:10.1111/jpi.12658.
- 1101 96. Kettner NM, Voicu H, Finegold MJ, Coarfa C, Sreekumar A, Putluri N, Katchy CA, Lee C,  
1102 Moore DD, Fu L: **Circadian Homeostasis of Liver Metabolism Suppresses  
1103 Hepatocarcinogenesis.** *Cancer Cell* 2016, **30**:909–924.
- 1104 97. Lee S, Donehower LA, Herron AJ, Moore DD, Fu L: **Disrupting Circadian Homeostasis of  
1105 Sympathetic Signaling Promotes Tumor Development in Mice.** *PLoS One* 2010, **5**:e10995.
- 1106 98. Mteyrek A, Filipinski E, Guettier C, Oklejewicz M, van der Horst GTJ, Okyar A, Lévi F:  
1107 **Critical cholangiocarcinogenesis control by cryptochrome clock genes.** *Int J Cancer* 2017,  
1108 **140**:2473–2483.
- 1109 99. Maury E, Hong HK, Bass J: **Circadian disruption in the pathogenesis of metabolic**

- 1110            **syndrome.** *Diabetes Metab* 2014, **40**:338–46.
- 1111    100. Paschos GK, FitzGerald GA: **Circadian clocks and vascular function.** *Circ Res* 2010,  
1112            **106**:833–841.
- 1113    101. O’Neill J, Hoyle NP, Robertson JB, Edgar RS, Beale AD, Peak-Chew SY, Day J, Costa ASH,  
1114            Frezza C, Causton HC: **Eukaryotic cell biology is temporally coordinated to support the**  
1115            **energetic demands of protein homeostasis.** *bioRxiv* 2020, doi:10.1101/2020.05.14.095521.
- 1116    102. Yoo S-H, Yamazaki S, Lowrey PL, Shimomura K, Ko CH, Buhr ED, Siepkka SM, Hong H-K,  
1117            Oh WJ, Yoo OJ, et al.: **PERIOD2::LUCIFERASE real-time reporting of circadian**  
1118            **dynamics reveals persistent circadian oscillations in mouse peripheral tissues.** *Proc Natl*  
1119            *Acad Sci U S A* 2004, **101**:5339–46.
- 1120    103. Seluanov A, Vaidya A, Gorbunova V: **Establishing Primary Adult Fibroblast Cultures**  
1121            **From Rodents.** *J Vis Exp* 2010, doi:10.3791/2033.
- 1122    104. Plubell DL, Wilmarth PA, Zhao Y, Fenton AM, Minnier J, Reddy AP, Klimek J, Yang X,  
1123            David LL, Pamir N: **Extended Multiplexing of Tandem Mass Tags (TMT) Labeling**  
1124            **Reveals Age and High Fat Diet Specific Proteome Changes in Mouse Epididymal Adipose**  
1125            **Tissue.** *Mol Cell Proteomics* 2017, **16**:873–890.
- 1126    105. Thaben PF, Westermark PO: **Detecting rhythms in time series with rain.** *J Biol Rhythms*  
1127            2014, **29**:391–400.
- 1128    106. Plitzko B, Kaweesa EN, Loesgen S: **The natural product mensacarcin induces**  
1129            **mitochondrial toxicity and apoptosis in melanoma cells.** *J Biol Chem* 2017, **292**:21102–  
1130            21116.
- 1131    107. Plitzko B, Loesgen S: **Measurement of Oxygen Consumption Rate (OCR) and**  
1132            **Extracellular Acidification Rate (ECAR) in Culture Cells for Assessment of the Energy**  
1133            **Metabolism.** *BIO-PROTOCOL* 2018, **8**.
- 1134    108. McShane E, Sin C, Zauber H, Wells JN, Donnelly N, Wang X, Hou J, Chen W, Storchova Z,  
1135            Marsh JA, et al.: **Kinetic Analysis of Protein Stability Reveals Age-Dependent**

1136            **Degradation.** *Cell* 2016, **167**:803-815.e21.

1137

1138

1139

## Supplementary figures

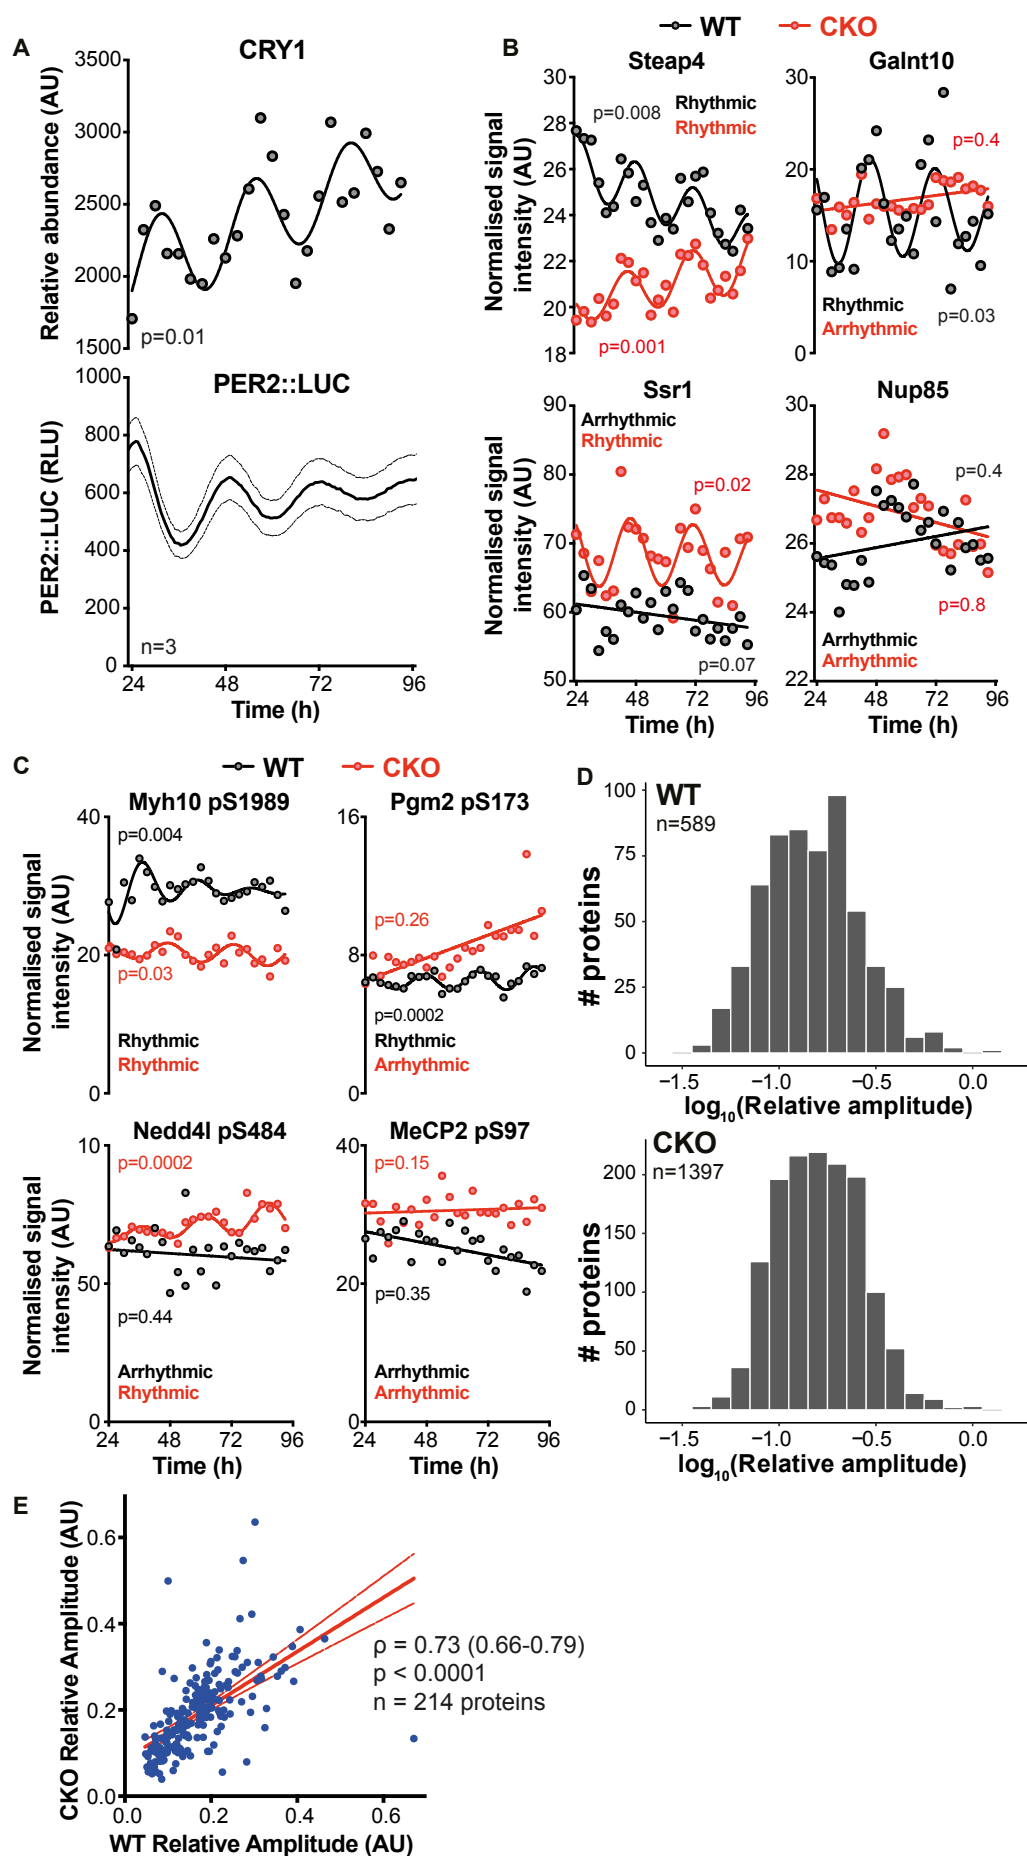

1140



1141 **Figure S1. Benchmarking and comparing relative amplitudes of the rhythmic proteome**

1142 **A)** The relative abundance of CRY1 detected in the WT dataset is plotted. It was preferentially fit by  
1143 a damped cosine wave over a straight line (Extra sum-of-squares F test,  $p=0.01$ ). Below: Longitudinal  
1144 bioluminescence recording of WT PER2::LUC fibroblasts, performed simultaneously with the  
1145 proteomics experiment as a phase marker. Mean $\pm$ SEM.

1146 **B)** Examples of proteins detected by mass spectrometry are shown, labelled by gene name. Examples  
1147 are included of proteins that are rhythmic in both genotypes, rhythmic in only one genotype, or not  
1148 rhythmic in either. P-values shown are from a comparison of fit (F test, damped cosine against straight  
1149 line). Annotation as rhythmic/arrhythmic are from the RAIN output.

1150 **C)** Examples of phosphopeptides detected by mass spectrometry are shown, labelled by gene name  
1151 and phosphosite. Examples are included of phosphopeptides that are rhythmic in both genotypes,  
1152 rhythmic in only one genotype, or not rhythmic in either. Annotation as in B).

1153 **D)** Histograms showing the frequency distributions of relative amplitudes of proteins in WT and CKO  
1154 cells. The median relative amplitude was significantly higher in CKO cells compared to WT ( $p=0.008$ ,  
1155 Kolmogorov-Smirnov test), although the difference was small (WT median = 0.15, CKO median =  
1156 0.16).

1157 **E)** The relative amplitudes of all proteins rhythmic (without the 10% threshold applied) in both WT  
1158 and CKO cells were plotted, showing a positive correlation between the genotypes. Spearman  
1159 correlation coefficient ( $\rho$ ) = 0.73 (95% confidence interval 0.66-0.79),  $p < 0.0001$ ,  $n = 214$  proteins.  
1160 In red, the linear regression line is plotted with 95% confidence interval.

1161

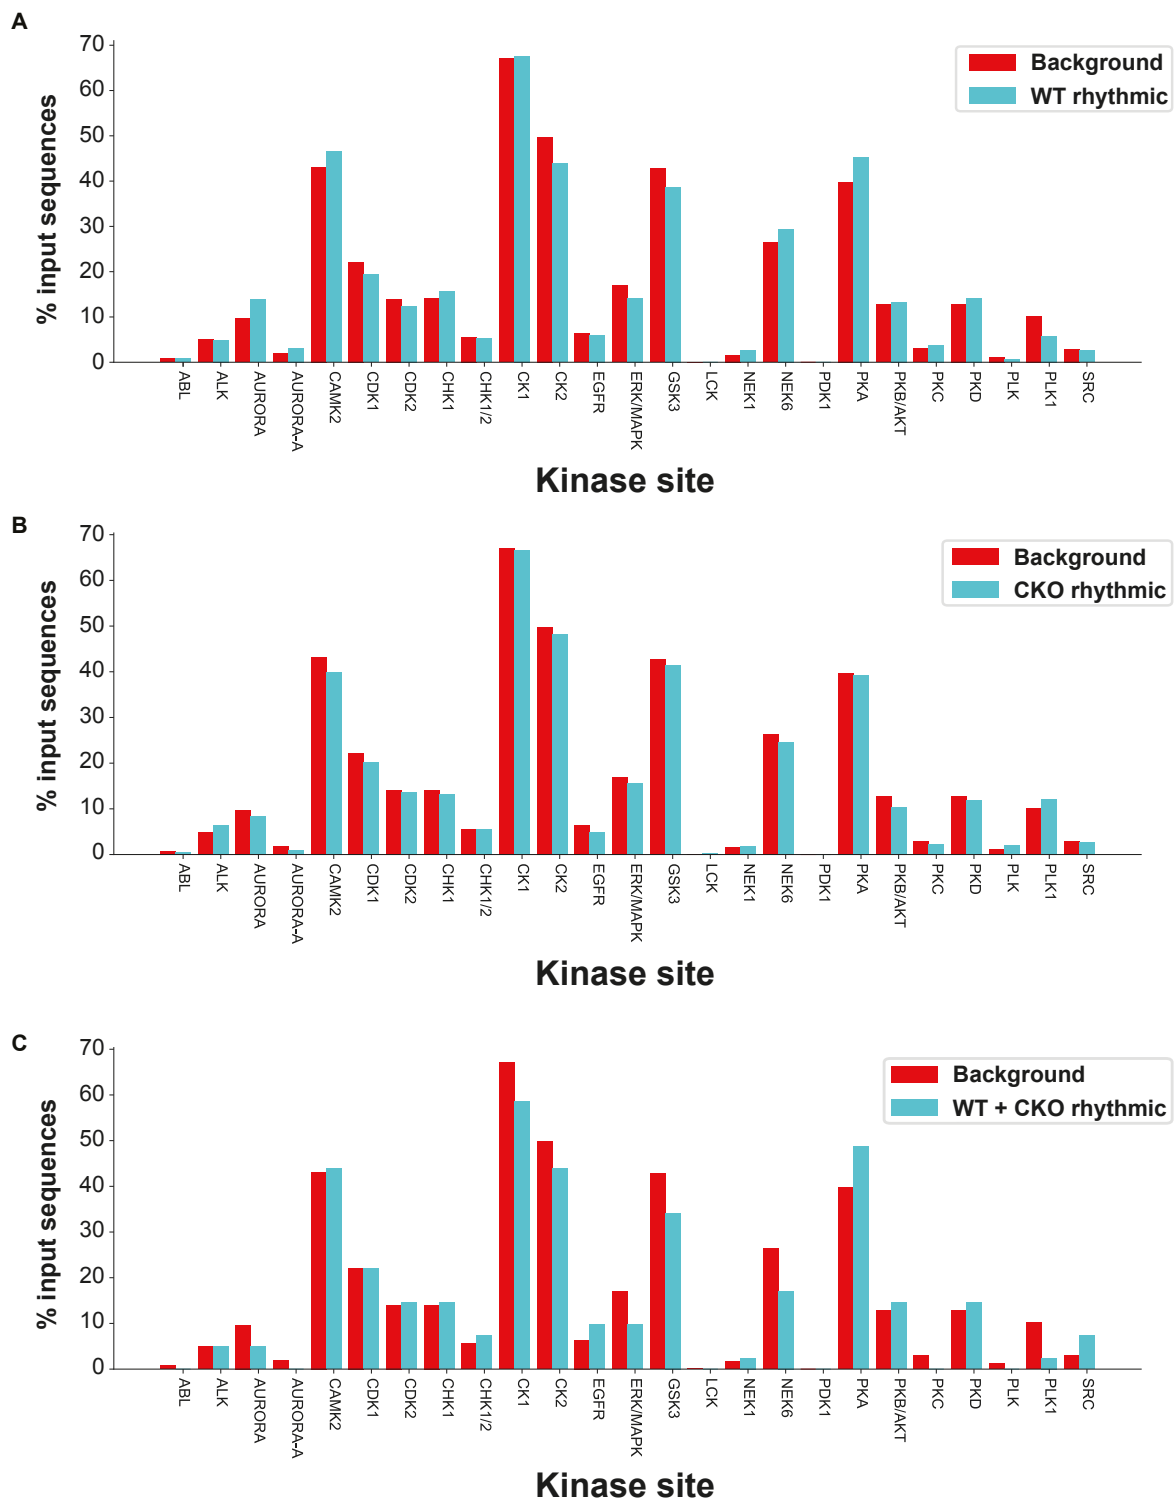

1162

1163 **Figure S2. Kinase inference from phosphopeptides in WT and CKO cells**

1164 **A), B, C)** Using the phosphoproteomics dataset, phosphopeptide sequences were analysed, with the  
 1165 number of kinase binding motifs counted for a panel of 25 kinases present in the PHOSIDA database  
 1166 [37,38]. Phosphopeptides that were rhythmic (in WT, in CKO, or in both genotypes respectively)  
 1167 were compared to the background of phosphopeptides present in all samples and pools.

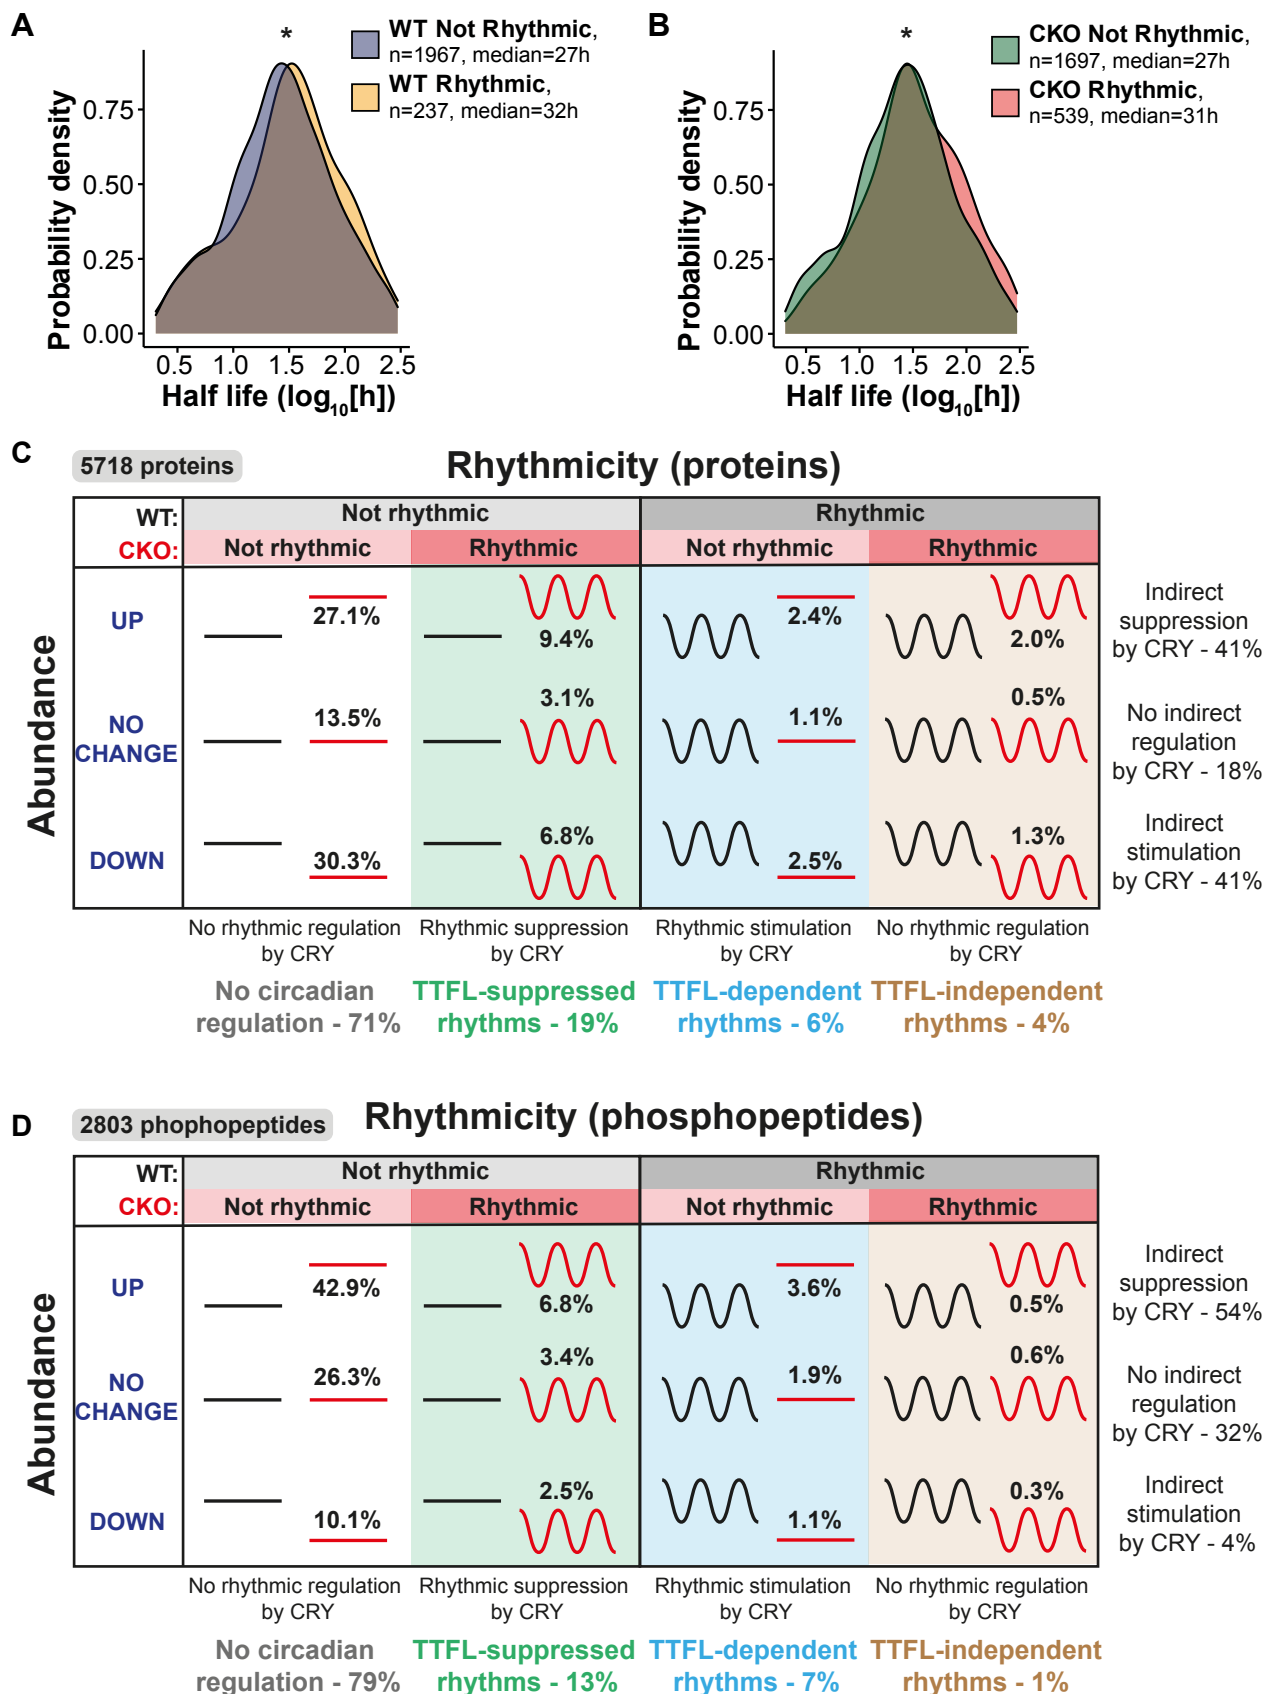

1168

1169 **Figure S3. CRY suppresses the proteome and phosphoproteome**

1170 **A), B)** Probability density graphs compare the distribution of protein half-life between rhythmic and

1171 non-rhythmic proteins. Half-life was calculated using data from McShane et al. [108]. In both

1172 genotypes, the difference in half-life was statistically significant (WT  $p=0.04$ , CKO  $p=0.01$ , boot-  
1173 strapped Kolmogorov-Smirnov test), but many proteins in our dataset were not present in the  
1174 published dataset. Medians (med): WT rhythmic = 32h, WT non-rhythmic = 27h, CKO rhythmic =  
1175 31h, CKO non-rhythmic = 27h.

1176 **C)** Table summarising the numbers of proteins detected in both genotypes with significantly  
1177 increased or decreased abundance (corrected  $p<0.05$  vs.  $p\geq 0.05$ ) and significant change in  
1178 rhythmicity (RAIN  $p<0.05$  vs.  $p\geq 0.05$ ) between WT and CKO cells. Rhythms in the abundance of  
1179 more proteins are suppressed by CRY than are dependent on CRY, and the abundance of most  
1180 detected proteins changes as a consequence of CRY deletion. There was a significant association  
1181 between change in abundance and change in rhythmicity (Fisher's exact test,  $p=0.04$ ).

1182 **D)** Table summarising the numbers of phosphopeptides detected in both genotypes with significantly  
1183 increased or decreased abundance (corrected  $p<0.05$  vs.  $p\geq 0.05$ ) and significant change in  
1184 rhythmicity (RAIN  $p<0.05$  vs.  $p\geq 0.05$ ) between WT and CKO cells. More rhythms in protein  
1185 phosphorylation are suppressed by CRY than are facilitated by CRY, and most detected protein  
1186 phosphorylation changes as a consequence of CRY deletion. There was a significant association  
1187 between change in abundance and change in rhythmicity (Fisher's exact test,  $p=0.009$ ).

1188

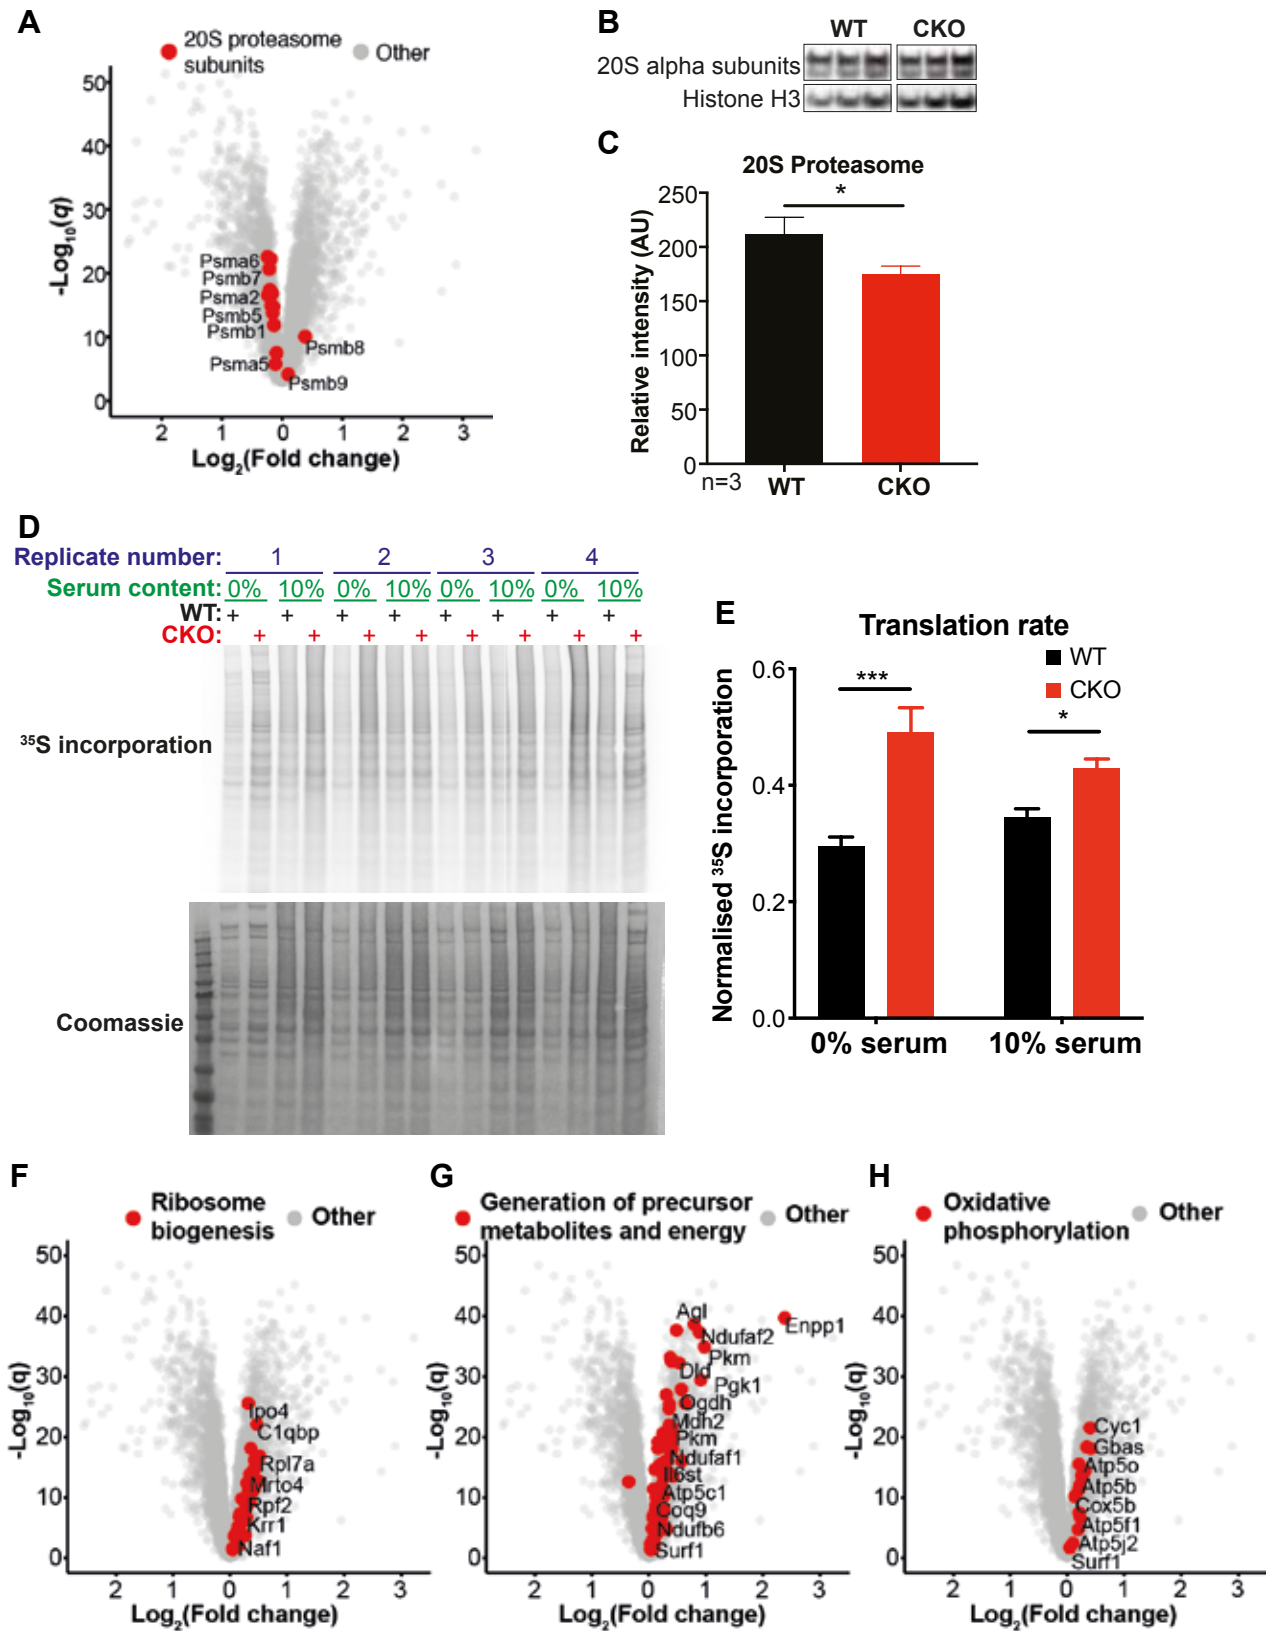

1189

1190 **Figure S4. CKO cells have fewer 20S proteasomes, increased translation rate, and upregulated**

1191 **energy generation protein expression**

1192 **A)** Volcano plot showing the fold change in average expression of all proteins in CKO cells compared  
1193 to WT ( $q$  = Benjamini-Hochberg corrected p-value). 20S proteasome subunits are highlighted in red,  
1194 showing that most of these subunits are downregulated in CKO cells.

1195 **B)** Representative Western blot using an antibody that recognises all 7  $\alpha$  subunits of the 20S  
1196 proteasome, with anti-histone H3 as loading control.

1197 **C)** Quantification of the blots in B), using all replicates. Mean $\pm$ SEM, Student's t test with Welch  
1198 correction.

1199 **D)**  $^{35}\text{S}$ -methionine incorporation was used to measure translation rate in cultured WT and CKO cells.  
1200 This was carried out at 0% and 10% serum. 4 replicates are shown, run on the same gel. An image of  
1201 the phosphor screen is shown above, with the corresponding Coomassie stain below. The condition  
1202 with 10% serum is shown in Figure 2 as this represents normal culture conditions.

1203 **E)** Quantification of D). 2-way ANOVA showed interaction between the effects of serum and  
1204 genotype ( $p=0.045$ ). Holm-Sidak multiple comparisons results are shown as asterisks.  $N=3$ .

1205 **F), G), H)** Volcano plots illustrate the upregulation of proteins classed in the GO terms: ribosome  
1206 biogenesis, generation of precursor metabolites and energy, oxidative phosphorylation. Proteins that  
1207 are classified under each GO term are highlighted in red, whilst all other proteins are shown in grey.  
1208 Gene names of the proteins are labelled, within the constraints of space.

1209

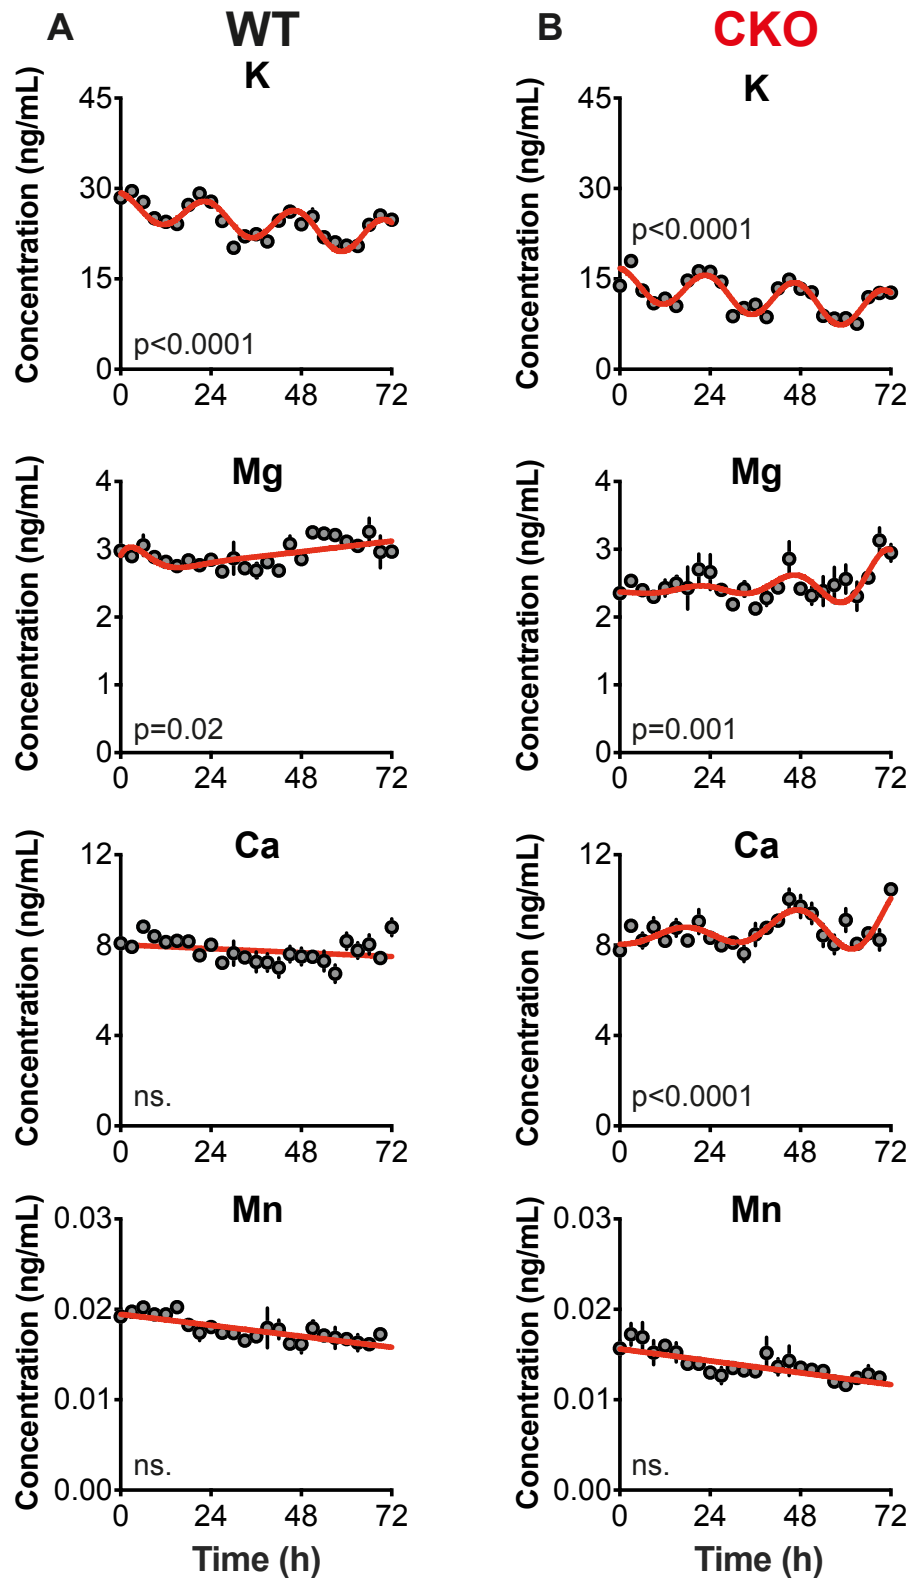

1210

1211 **Figure S5. ICP-MS measurement of cellular ion content in CKO and WT cells**

1212 **A), B)** Examples of ions detected from both WT and CKO cells by ICP-MS are shown. Mean $\pm$ SEM,

1213 F test for comparison of fit between damped cosine and straight line, N=3. The preferred fit is shown

1214 in red.

**A** **GO Biological Process**  
**CKO vs WT ranked by fold change**

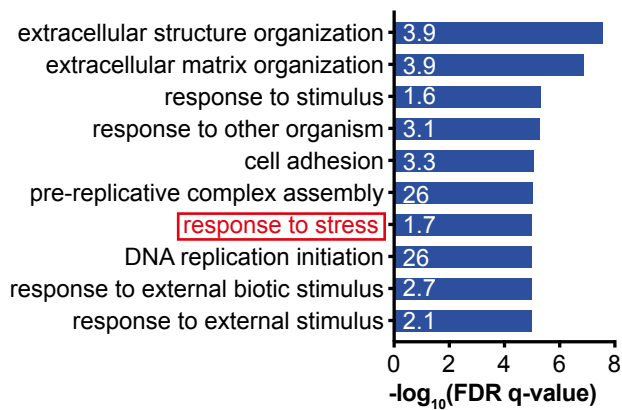

1215

**B**

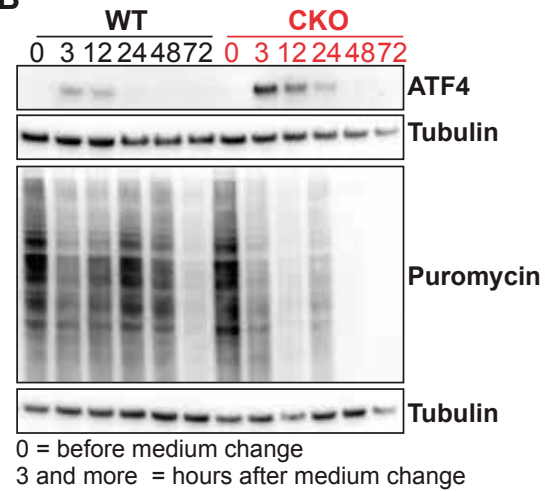

1216 **Figure S6. Increased stress response in CKO cells**

1217 **A)** Ranked gene ontology for Biological Process was analysed using a list of all the detected proteins  
1218 in the proteomics experiment, ranked according to fold change in average expression in CKO cells  
1219 relative to WT. The top GO terms by FDR q-value are shown, with fold-enrichment annotated.

1220 **B)** Western blot showing an increased stress response in response to a medium change in CKO cells  
1221 compared to WT. Cultured cells had the medium changed at time 0 hours into “air medium” (see  
1222 Methods), and at each time point indicated a puromycin pulse was applied before lysing the cells to  
1223 measure translation rate. ATF4 is a marker of the integrated stress response, and Tubulin is the  
1224 loading control.

1225
